# Supplementary material
Source: PubMed Central journal article supplement (PMC3112310)
Supplement: NIHMS289746-supplement-1_si_001.pdf [file NIHMS289746-supplement-1_si_001.pdf]

# $\alpha$ -Azido bisphosphonates: synthesis and nucleotide analogues

Brian T. Chamberlain, Thomas G. Upton, Boris A. Kashemirov and Charles E. McKenna\*

Department of Chemistry, University of Southern California, Los Angeles, CA 90089-0744 USA

\*mckenna@usc.edu

## Supporting Information

### Table of Contents

|                                                                                                                 |    |
|-----------------------------------------------------------------------------------------------------------------|----|
| Materials and Methods.....                                                                                      | 3  |
| Preparation of azido transfer reagents.....                                                                     | 3  |
| Preparation of tert-butyl hypochlorite, t-BuOCl.....                                                            | 3  |
| Figure S1. <sup>1</sup> H NMR spectrum (CDCl <sub>3</sub> ; 399.8 MHz) of 1.....                                | 4  |
| Figure S2. gCOSY NMR spectrum (CDCl <sub>3</sub> ; 400.2 MHz) of 1.....                                         | 5  |
| Figure S3. <sup>13</sup> C { <sup>1</sup> H} NMR spectrum (CDCl <sub>3</sub> ; 100.5 MHz) of 1.....             | 6  |
| Figure S4. <sup>31</sup> P NMR spectra (CDCl <sub>3</sub> ; 161.9 MHz) of 1.....                                | 7  |
| Figure S5. IR spectrum (film, NaCl plate) of 1.....                                                             | 8  |
| Figure S6. <sup>1</sup> H NMR spectrum (CDCl <sub>3</sub> ; 399.8 MHz) of 2.....                                | 9  |
| Figure S7. gCOSY NMR spectrum (CDCl <sub>3</sub> ; 400.2 MHz) of 2.....                                         | 10 |
| Figure S8. <sup>13</sup> C { <sup>1</sup> H} NMR spectrum (CDCl <sub>3</sub> ; 100.5 MHz) of 2.....             | 11 |
| Figure S9. <sup>31</sup> P NMR spectra (CDCl <sub>3</sub> ; 161.9 MHz) of 2.....                                | 12 |
| Figure S10. IR spectrum (film, NaCl plate) of 2.....                                                            | 13 |
| Figure S11. <sup>1</sup> H NMR spectrum (D <sub>2</sub> O, pH 10.88; 399.8 MHz) of 3.....                       | 14 |
| Figure S12. <sup>13</sup> C { <sup>1</sup> H} NMR spectrum (D <sub>2</sub> O, pH 10.88; 100.5 MHz) of 3.....    | 15 |
| Figure S13. <sup>31</sup> P NMR spectra (D <sub>2</sub> O, pH 10.88; 161.9 MHz) of 3.....                       | 16 |
| Figure S14. IR spectrum (KBr pellet) of 3.....                                                                  | 17 |
| Figure S15. HRMS (ESI/ACPI) of 3.....                                                                           | 18 |
| Figure S16. <sup>1</sup> H NMR spectrum (D <sub>2</sub> O, pH 10.88; 399.8 MHz) of 4.....                       | 19 |
| Figure S17. <sup>13</sup> C { <sup>1</sup> H} NMR spectrum (D <sub>2</sub> O, pH 10.88; 100.5 MHz) of 4.....    | 20 |
| Figure S18. <sup>31</sup> P NMR spectra (D <sub>2</sub> O, pH 10.88; 161.9 MHz) of 4.....                       | 21 |
| Figure S19. IR spectrum (KBr pellet) of 4.....                                                                  | 22 |
| Figure S20. HRMS (ESI/ACPI) of 4.....                                                                           | 23 |
| Figure S21. <sup>1</sup> H NMR spectrum (D <sub>2</sub> O, pH 10.88; 399.8 MHz) of 5a/b.....                    | 24 |
| Figure S22. <sup>31</sup> P { <sup>1</sup> H} NMR spectrum (D <sub>2</sub> O, pH 10.88; 161.9 MHz) of 5a/b..... | 25 |
| Figure S23. <sup>31</sup> P { <sup>1</sup> H} NMR of 5a/b.....                                                  | 26 |
| Figure S24. HRMS (ESI/ACPI) of 5a/b.....                                                                        | 27 |
| Figure S25. <sup>1</sup> H NMR spectrum (D <sub>2</sub> O, pH 10.88; 399.8 MHz) of 6a/b.....                    | 28 |
| Figure S26. <sup>31</sup> P { <sup>1</sup> H} NMR spectrum (D <sub>2</sub> O, pH 10.88; 161.9 MHz) of 6a/b..... | 29 |
| Figure S27. HRMS (ESI/ACPI) of 6a/b.....                                                                        | 30 |

|                                                                                                                                                       |    |
|-------------------------------------------------------------------------------------------------------------------------------------------------------|----|
| Figure S28. <sup>31</sup> P NMR spectrum (D <sub>2</sub> O, pH 10.88; 161.9 MHz) of 14a. ....                                                         | 31 |
| Figure S29. <sup>31</sup> P NMR spectrum (D <sub>2</sub> O, pH 10.88; 161.9 MHz) of 14b. ....                                                         | 32 |
| Figure S30. <sup>1</sup> H NMR spectrum (D <sub>2</sub> O, pH 10.88; 399.8 MHz) of 14a. ....                                                          | 33 |
| Figure S31. <sup>1</sup> H NMR spectrum (D <sub>2</sub> O, pH 10.88; 399.8 MHz) of 14b. ....                                                          | 34 |
| Figure S32. <sup>1</sup> H NMR spectrum (D <sub>2</sub> O, pH 10.88; 499.7 MHz) of 7a. ....                                                           | 35 |
| Figure S33. <sup>31</sup> P { <sup>1</sup> H} NMR spectrum (D <sub>2</sub> O, pH 10.88; 202.5 MHz) of 7a. ....                                        | 36 |
| Figure S34. <sup>1</sup> H NMR spectrum (D <sub>2</sub> O, pH 10.88; 499.7 MHz) of 7b. ....                                                           | 37 |
| Figure S35. <sup>31</sup> P { <sup>1</sup> H} NMR spectrum (D <sub>2</sub> O, pH 10.88; 202.3 MHz) of 7b. ....                                        | 38 |
| Figure S36. UV/VIS spectrum of 7a in H <sub>2</sub> O. pH 8. ....                                                                                     | 39 |
| Figure S37. UV/VIS spectrum of 7b in H <sub>2</sub> O, pH 8. ....                                                                                     | 39 |
| Figure S38. CD spectra of 7a and 7b (25o C, 0.05 mM) in H <sub>2</sub> O, pH 8. ....                                                                  | 40 |
| Figure S39. <sup>31</sup> P spectrum (D <sub>2</sub> O, pH 10.88; 242.8 MHz) of 15a/b. ....                                                           | 41 |
| Figure S40. <sup>1</sup> H NMR spectrum (D <sub>2</sub> O, pH 10.88; 400.2 MHz) of 8a/b. ....                                                         | 42 |
| Figure S41. <sup>31</sup> P { <sup>1</sup> H} NMR spectrum (D <sub>2</sub> O, pH 10.88; 202.3 MHz) of 8a/b. ....                                      | 43 |
| Table S1. Summary of HPLC (SAX) retention data for dNTP analogues. ....                                                                               | 44 |
| Figure S42. Representative analytical HPLC (SAX) analysis. ....                                                                                       | 44 |
| Figure S43. <sup>31</sup> P { <sup>1</sup> H} of t-BuOK-induced decomposition of 2. ....                                                              | 45 |
| Figure S44. <sup>31</sup> P NMR spectrum (DMF; 202.5 MHz) of reaction mixture obtained by procedure for synthesis of “azido” product ref. 5. ....     | 46 |
| Figure S45. <sup>31</sup> P NMR spectrum (CDCl <sub>3</sub> ; 202.5 MHz) of triethyl diazophosphonoacetate obtained using procedure from ref. 5. .... | 47 |
| Figure S46. <sup>1</sup> H NMR spectrum (CDCl <sub>3</sub> ; 400.2 MHz) of triethyl diazophosphonoacetate obtained using procedure from ref. 5. ....  | 48 |
| Figure S47. MS (ACPi) [M+1] <sup>+</sup> spectrum of reaction mixture obtained using procedure from ref. 5. ....                                      | 49 |
| Figure S48. MS/MS spectrum of m/z 251. ....                                                                                                           | 50 |
| References. ....                                                                                                                                      | 51 |

## Materials and Methods

Proton spectra were referenced to residual  $\text{CHCl}_3$  ( $\delta$  7.24) in  $\text{CDCl}_3$  or to HDO ( $\delta$  4.79).  $^{13}\text{C}$  spectra were referenced to internal  $\text{CDCl}_3$  ( $\delta$  77.03) or internal carbonate ( $\delta$  168.88).  $^{31}\text{P}$  NMR spectra were referenced to external 85 %  $\text{H}_3\text{PO}_4$  (capillary,  $\delta$  0.00). pH values are reported without a deuterium isotope correction. IR samples were prepared for **1** and **2** as films on NaCl disks, and for **3** and **4** as solid KBr pellets.

### Preparation of azido transfer reagents

The desired sulfonyl chloride (1 equiv.) was dissolved in acetone and mixed with a solution of 3.5 equiv. of sodium azide in water, then stirred overnight at room temperature. The sulfonyl azide was precipitated by the addition of excess water, extracted into hexanes, dried over  $\text{MgSO}_4$ , and concentrated under reduced pressure. The sulfonyl azide reagents were used without further purification.

### Preparation of tert-butyl hypochlorite, *t*-BuOCl

To ice cold Clorox<sup>®</sup> (250 mL), a solution of 18.5 mL *t*-BuOH and 12.25 mL glacial acetic acid was added quickly. The mixture was stirred and poured into a separatory funnel where it was washed with 25 mL 10 %  $\text{Na}_2\text{CO}_3$ .<sup>1</sup> The organic layer was dried and stored over  $\text{CaCl}_2$  and used without further purification.

Figure S1.  $^1\text{H}$  NMR spectrum ( $\text{CDCl}_3$ ; 399.8 MHz) of **1**.

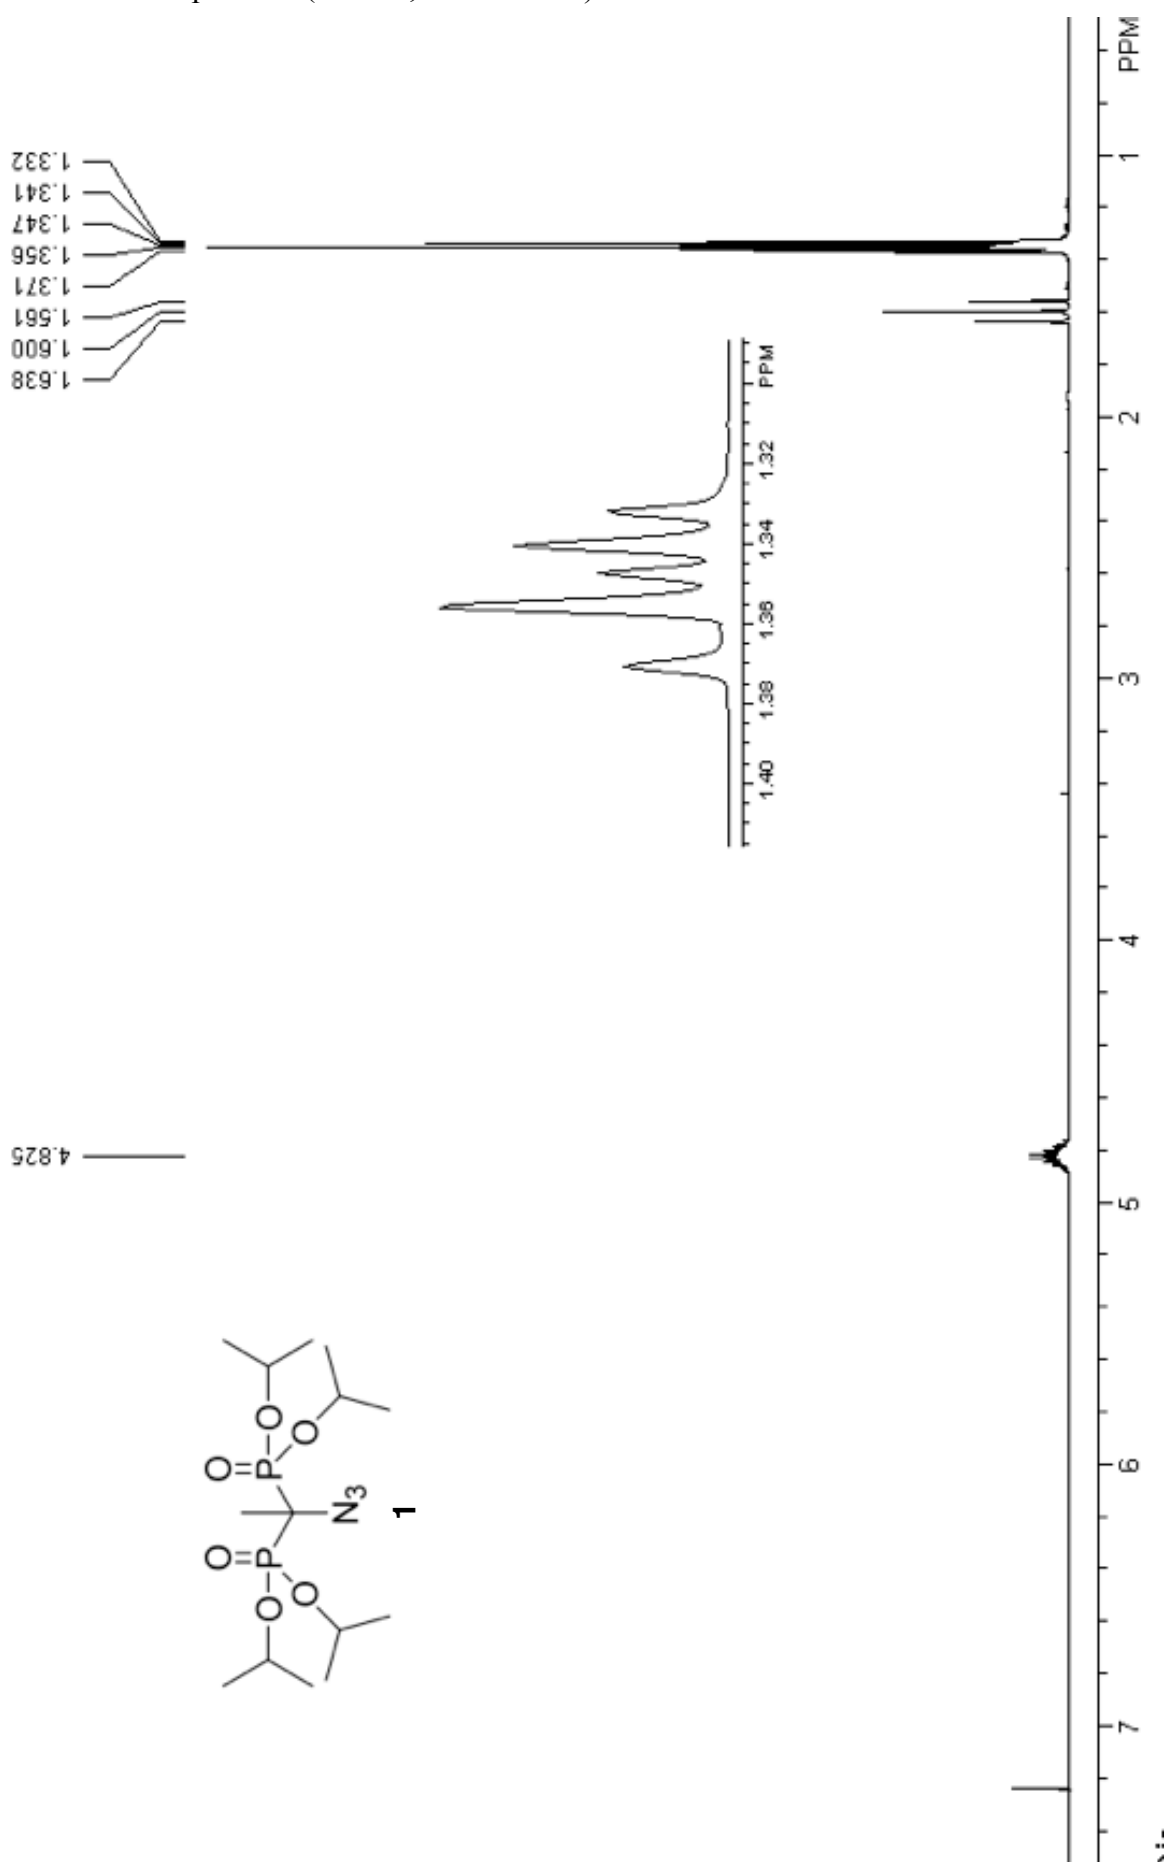

**Figure S2.** gCOSY NMR spectrum (CDCl<sub>3</sub>; 400.2 MHz) of **1**.

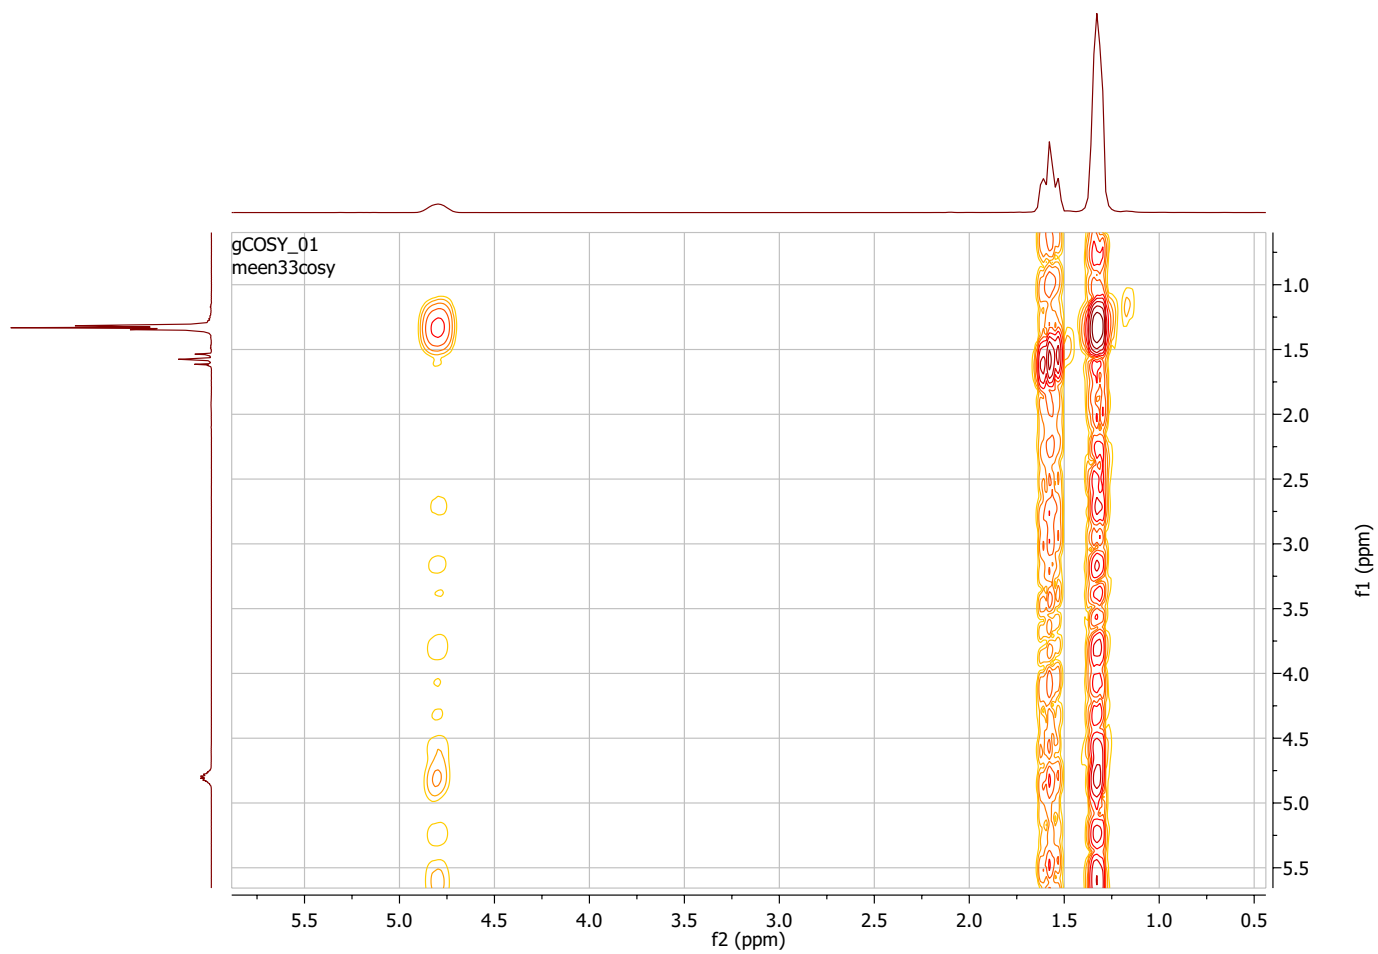

**Figure S3.**  $^{13}\text{C}$   $\{^1\text{H}\}$  NMR spectrum ( $\text{CDCl}_3$ ; 100.5 MHz) of **1**.

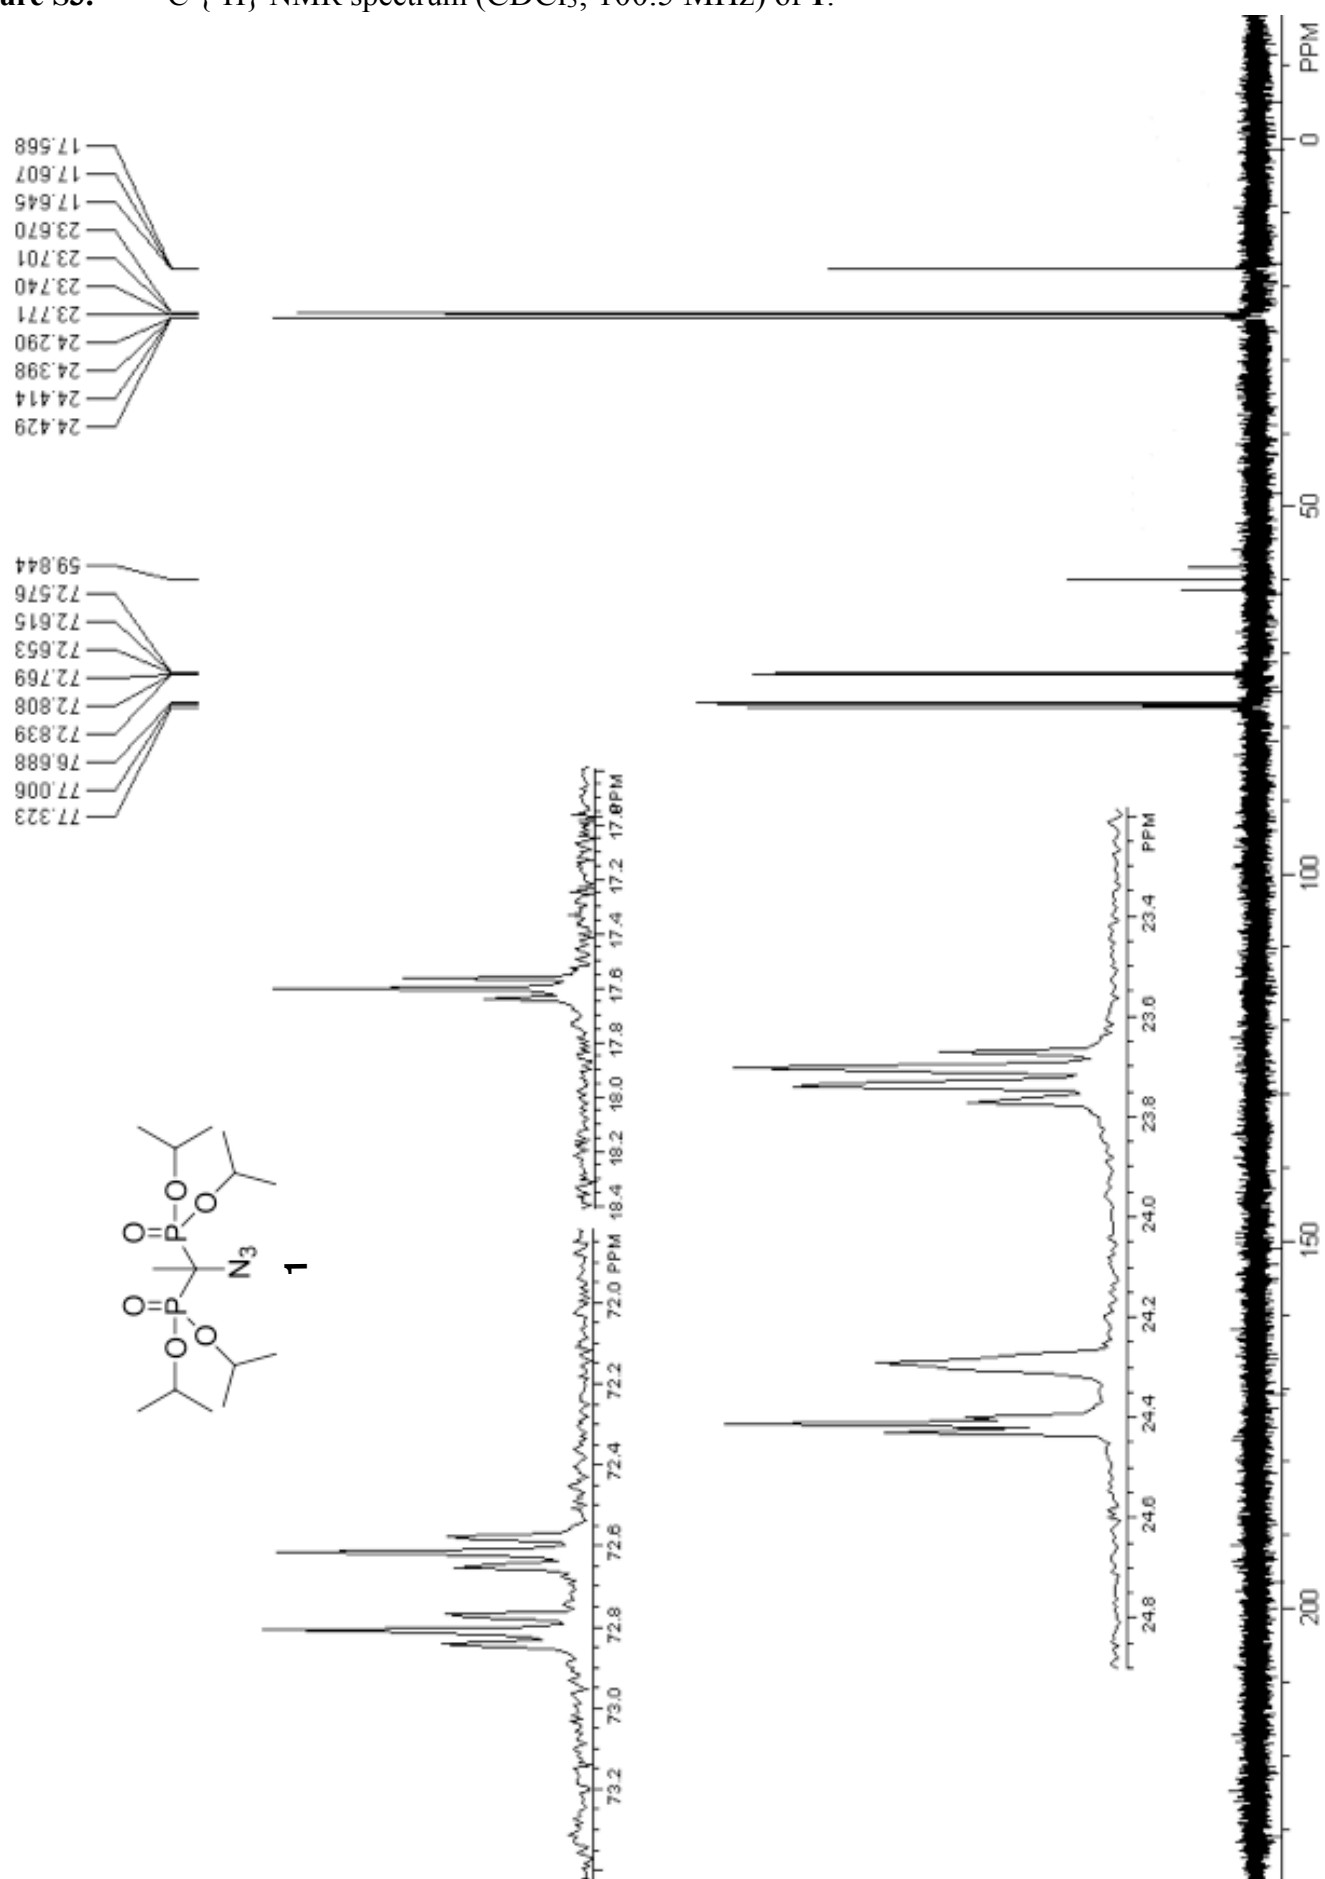

**Figure S4.**  $^{31}\text{P}$  NMR spectra ( $\text{CDCl}_3$ ; 161.9 MHz) of **1**.

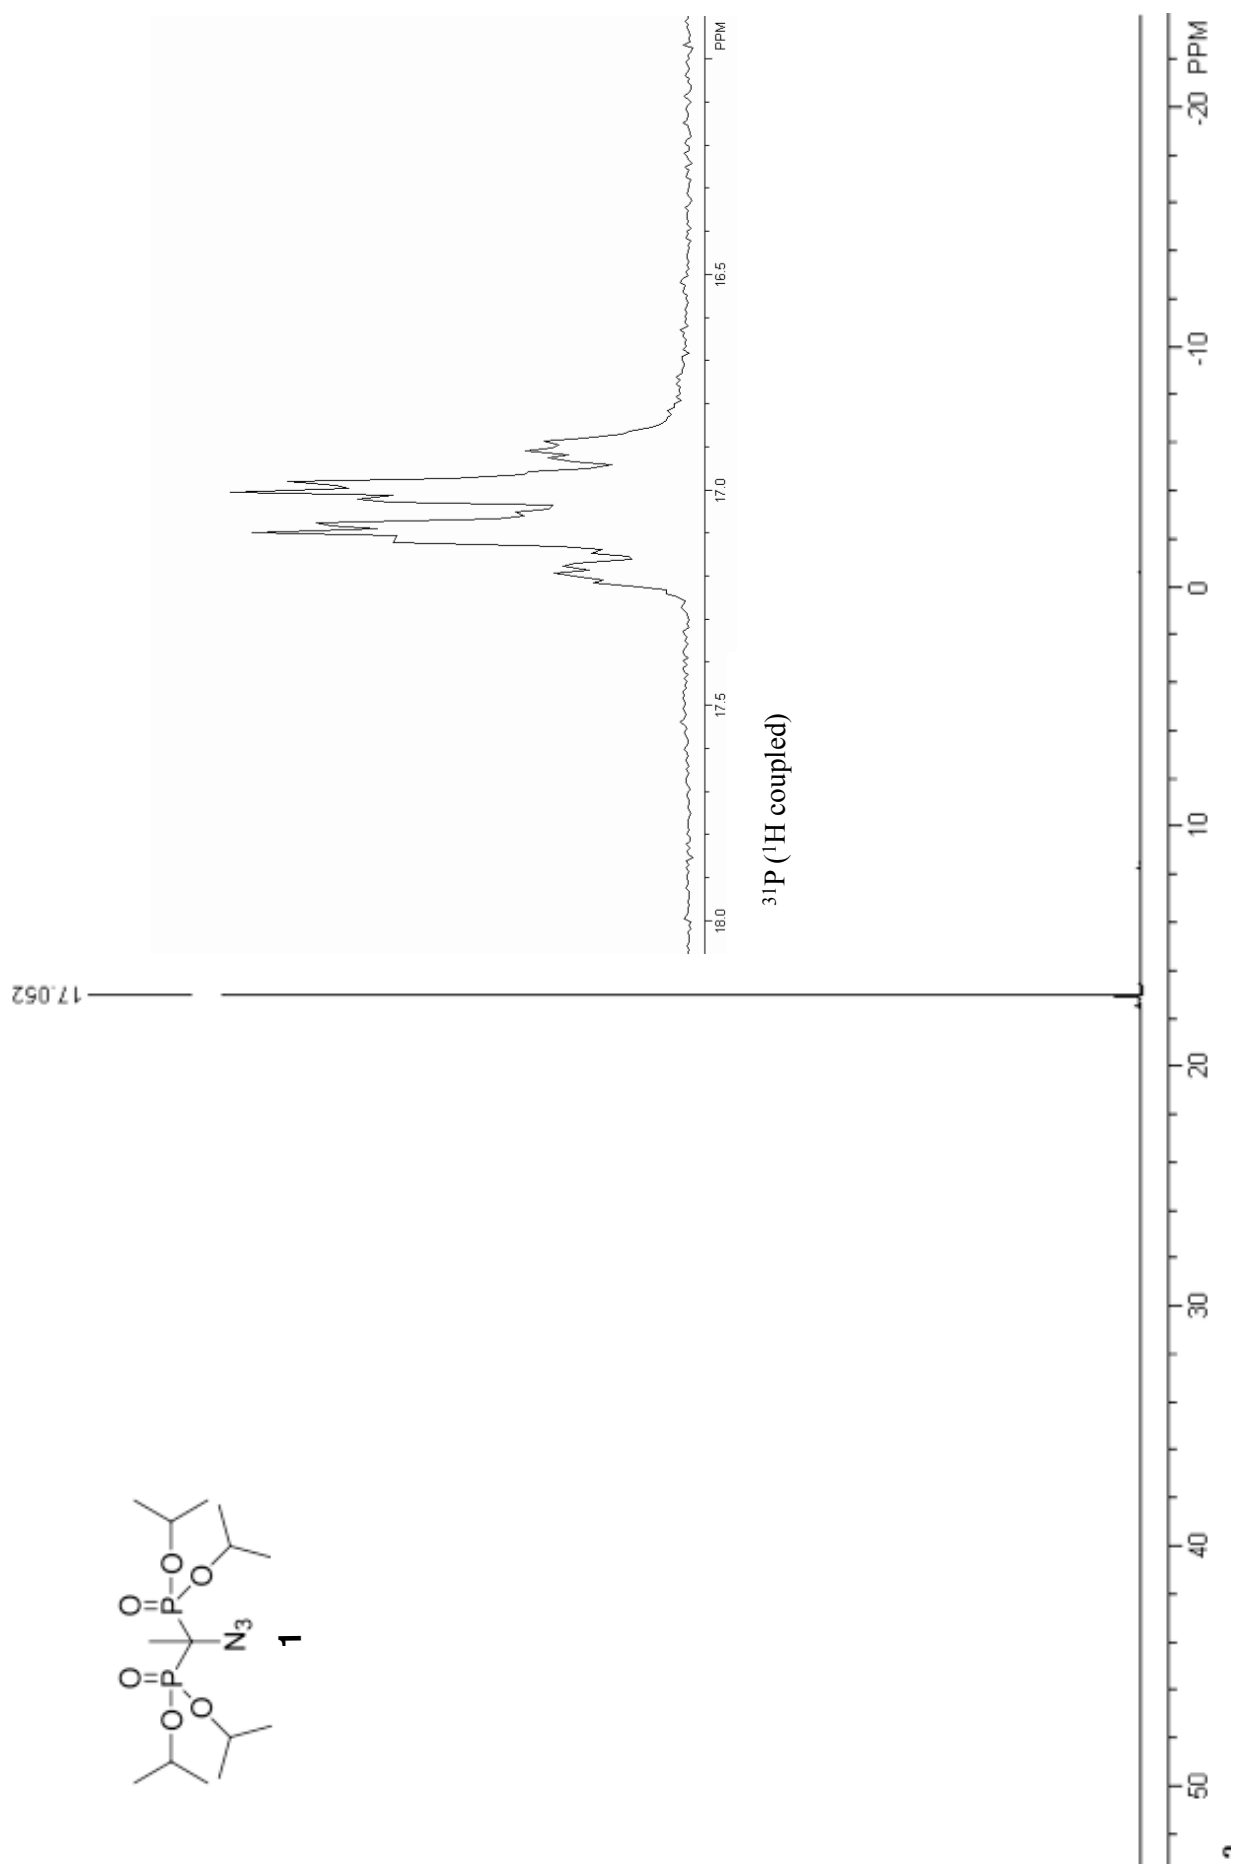

Figure S5. IR spectrum (film, NaCl plate) of 1.

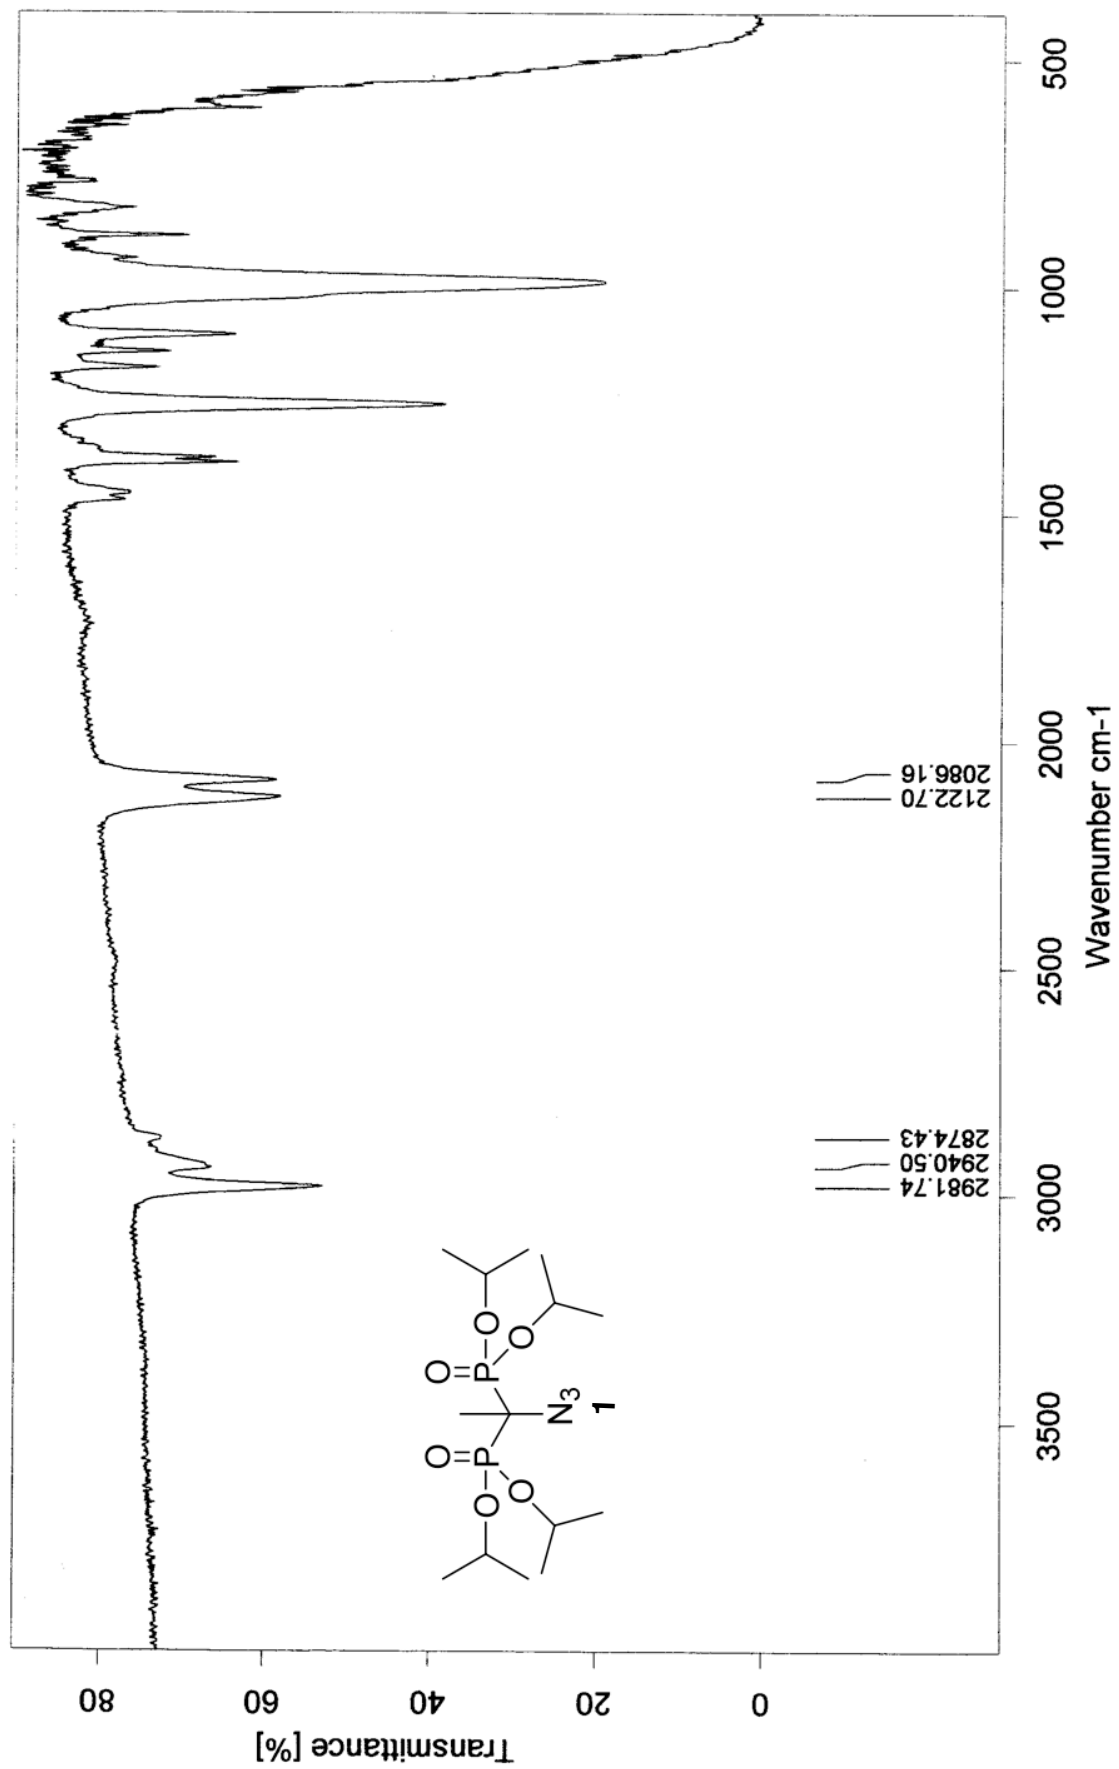



**Figure S6.**  $^1\text{H}$  NMR spectrum ( $\text{CDCl}_3$ ; 399.8 MHz) of **2**.

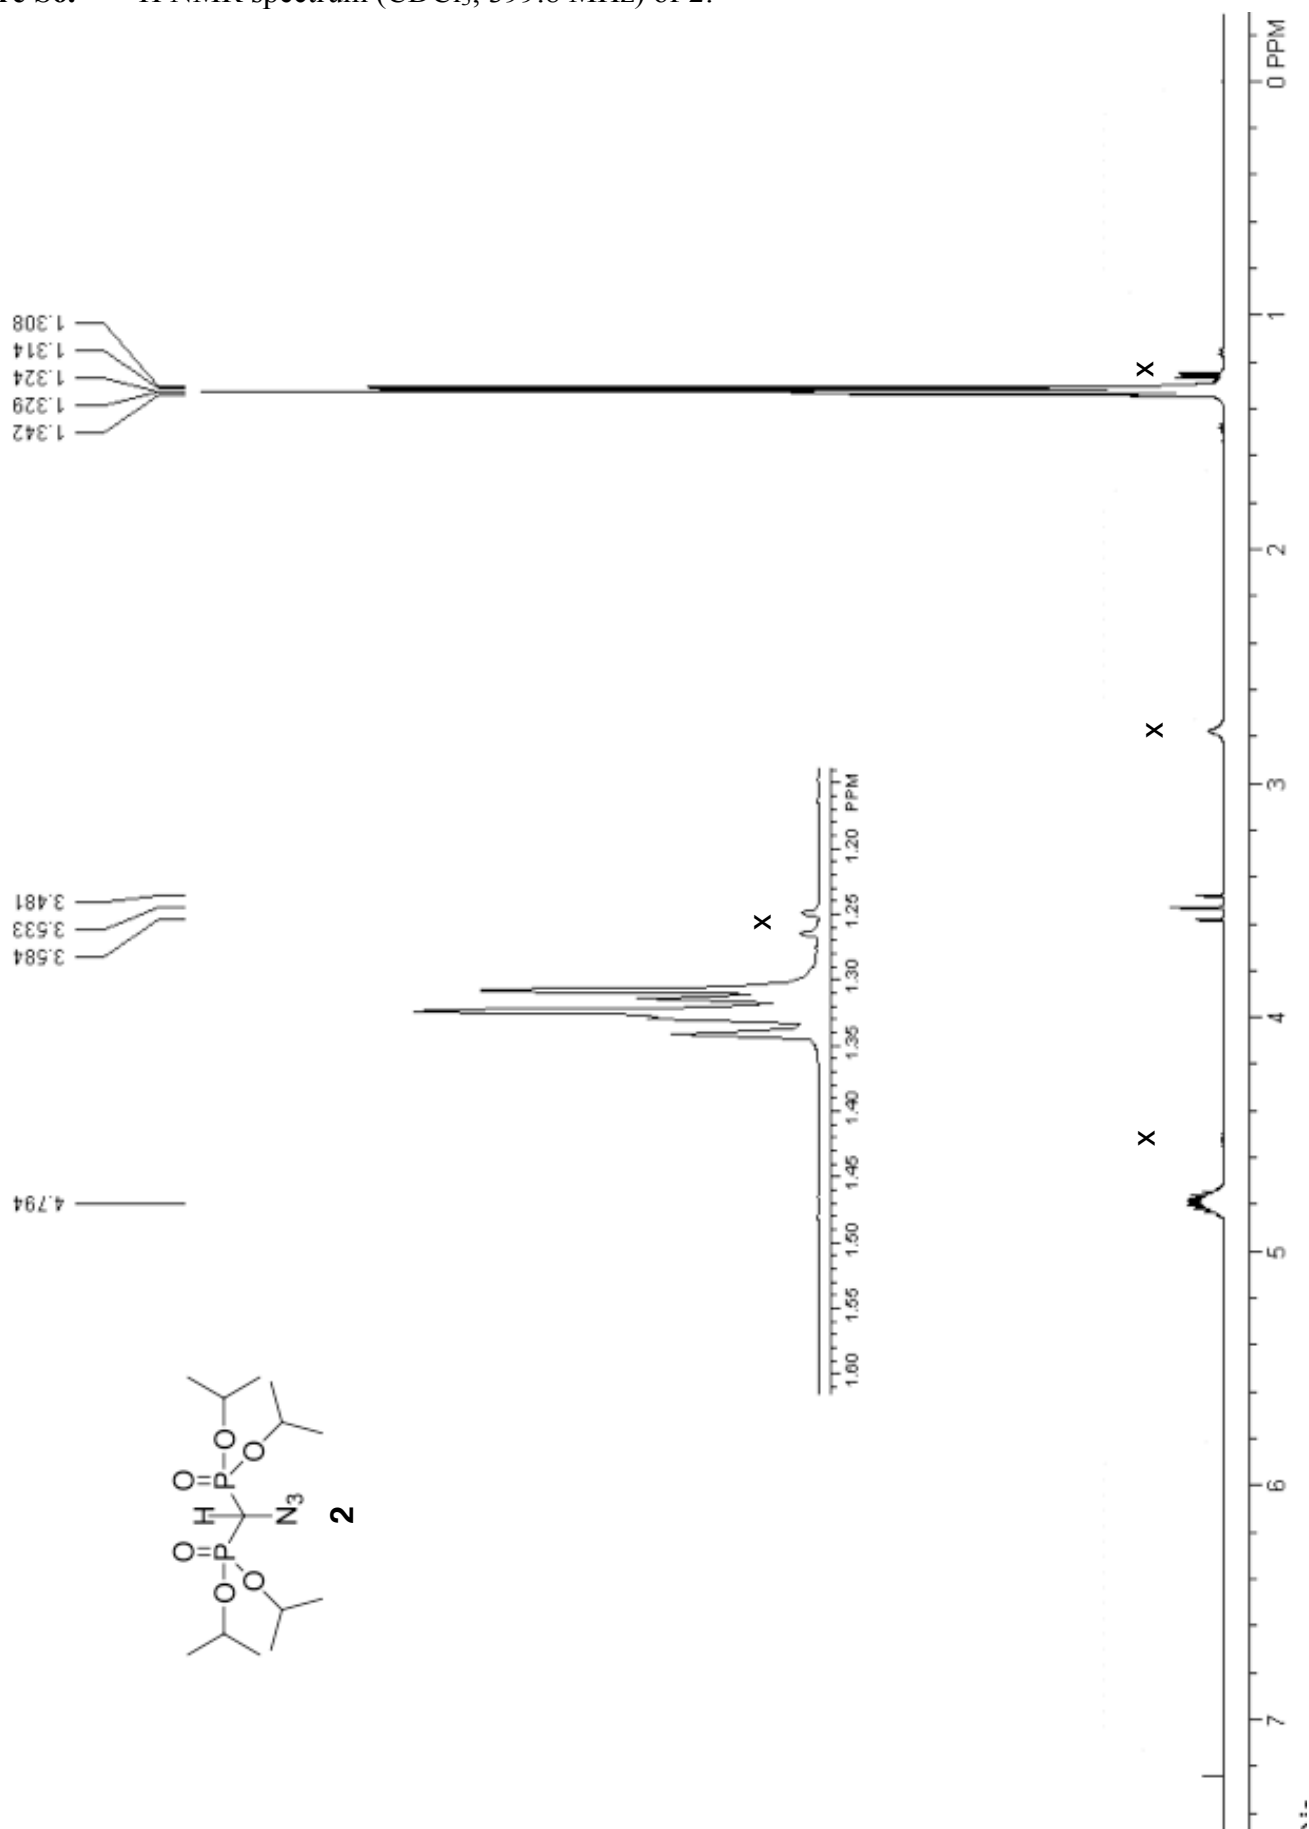

**Figure S7.** gCOSY NMR spectrum (CDCl<sub>3</sub>; 400.2 MHz) of **2**.

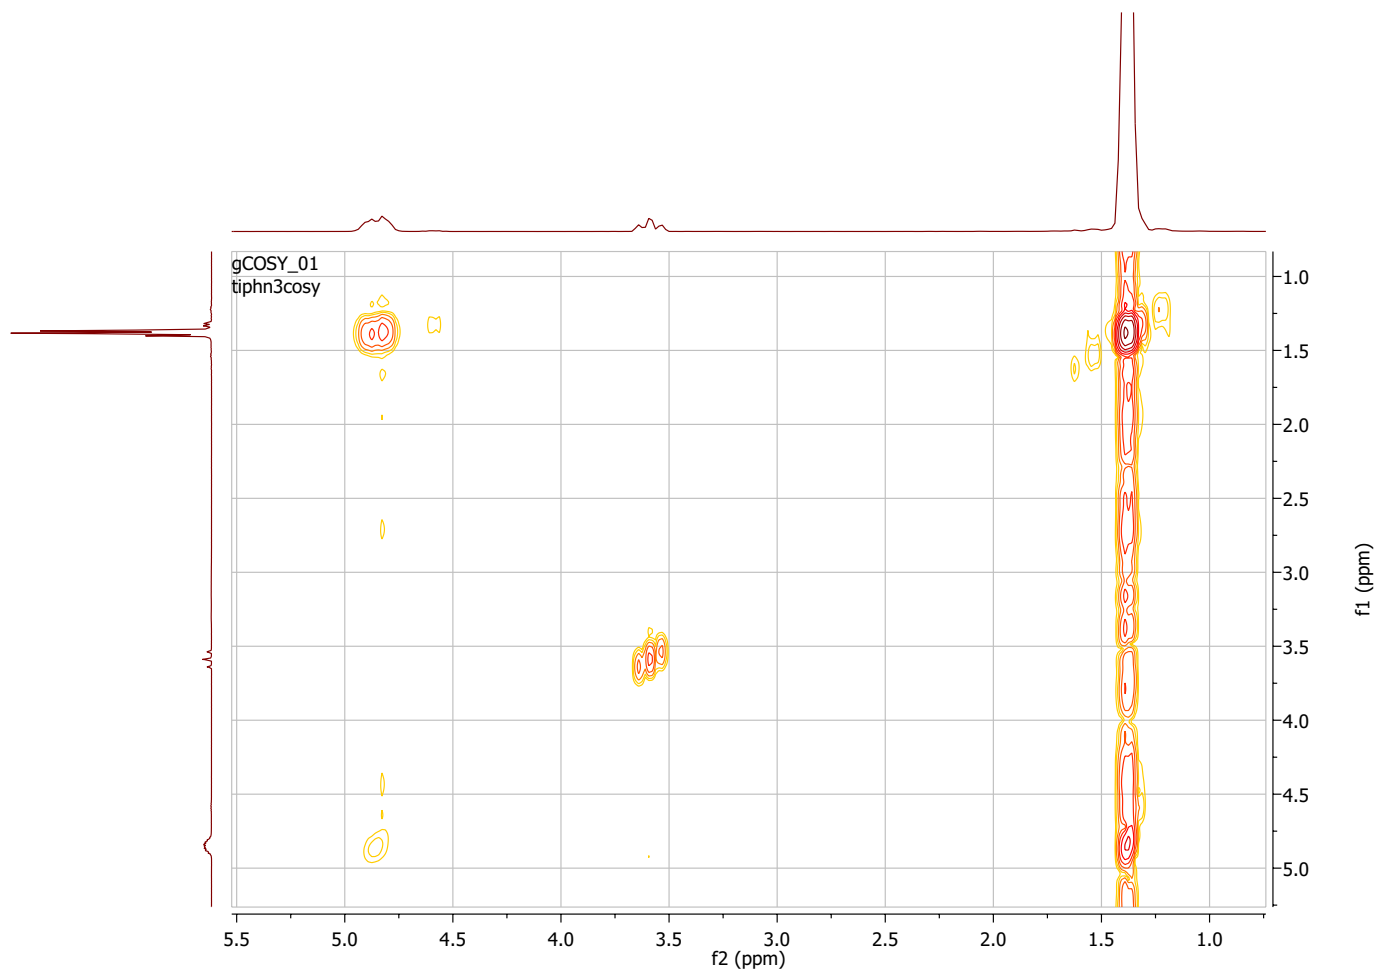



**Figure S9.**  $^{31}\text{P}$  NMR spectra ( $\text{CDCl}_3$ ; 161.9 MHz) of **2**.

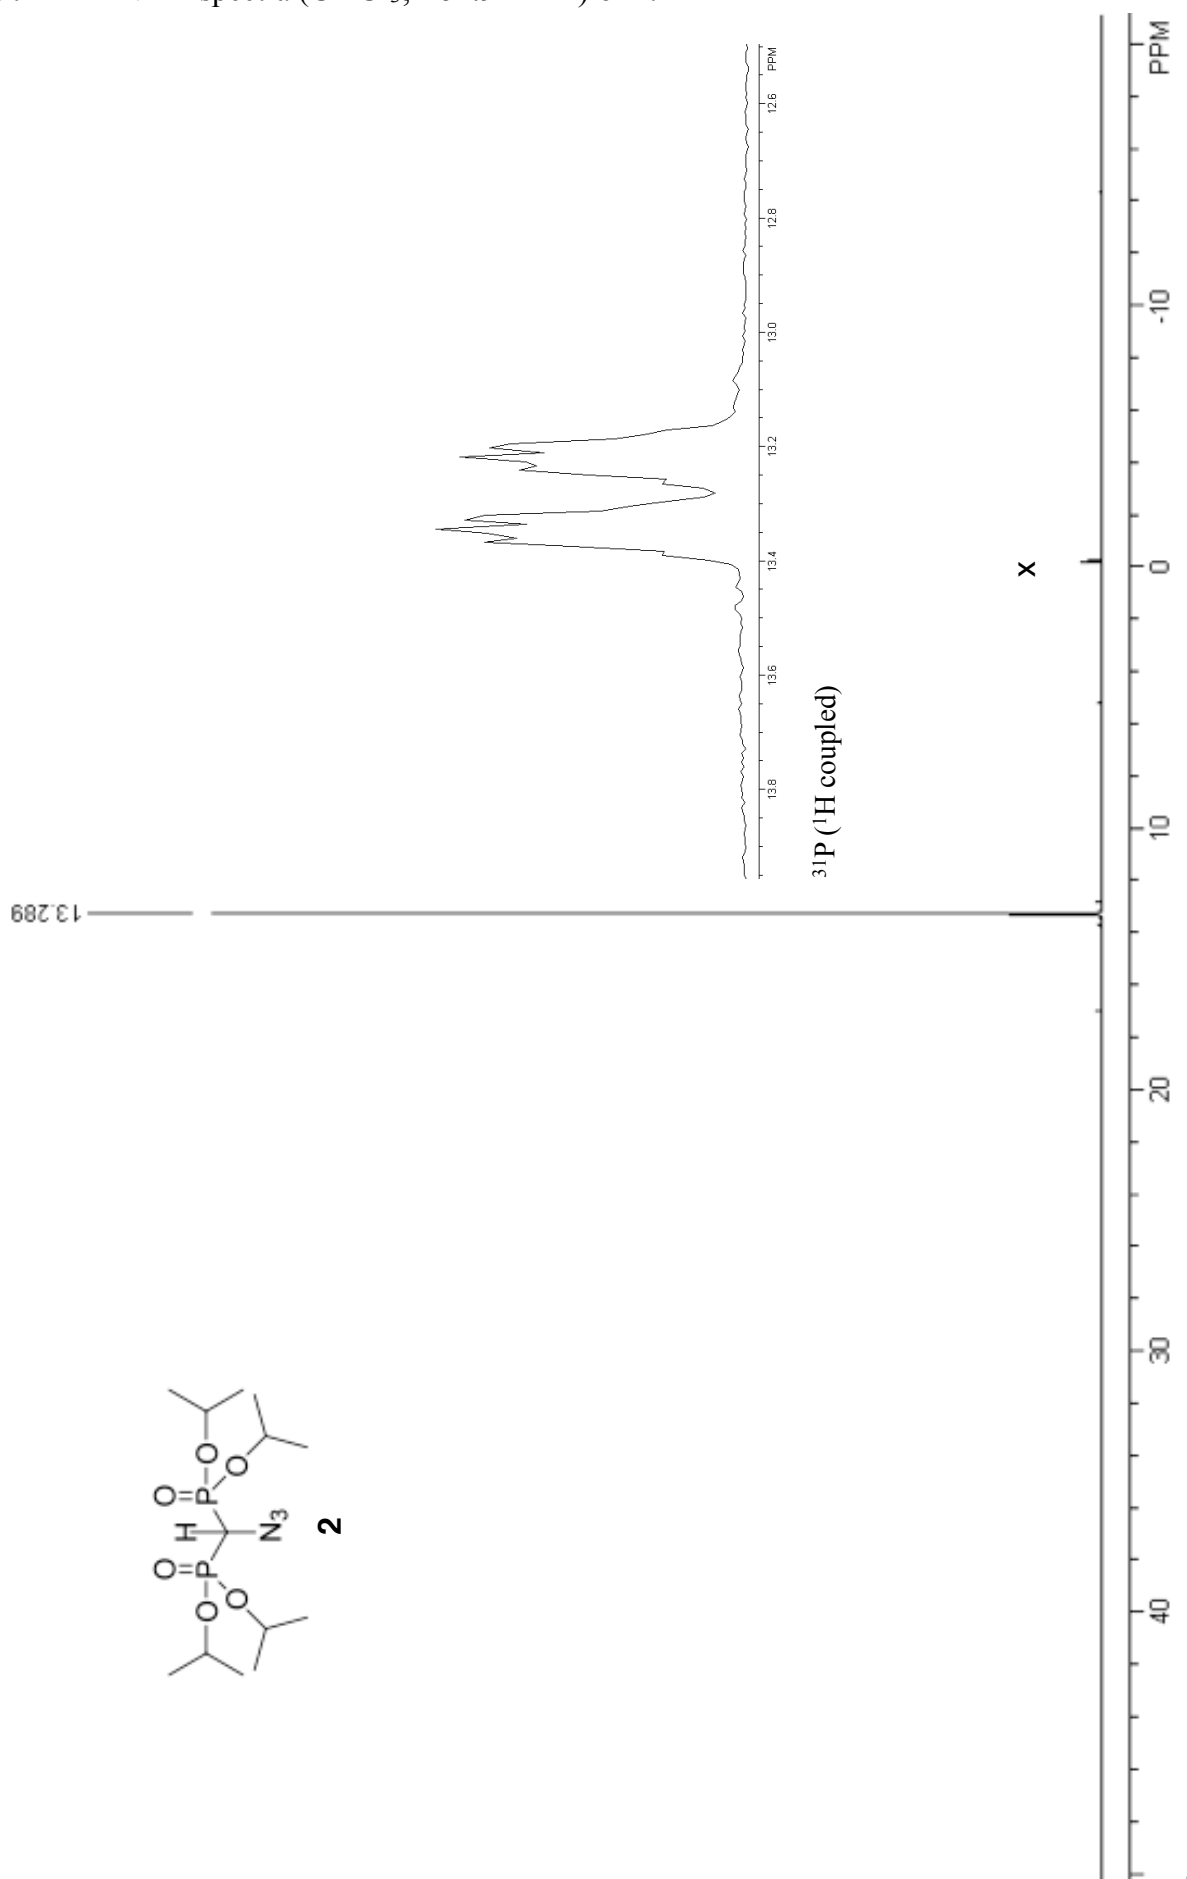



**Figure S11.**  $^1\text{H}$  NMR spectrum ( $\text{D}_2\text{O}$ , pH 10.88; 399.8 MHz) of **3**.

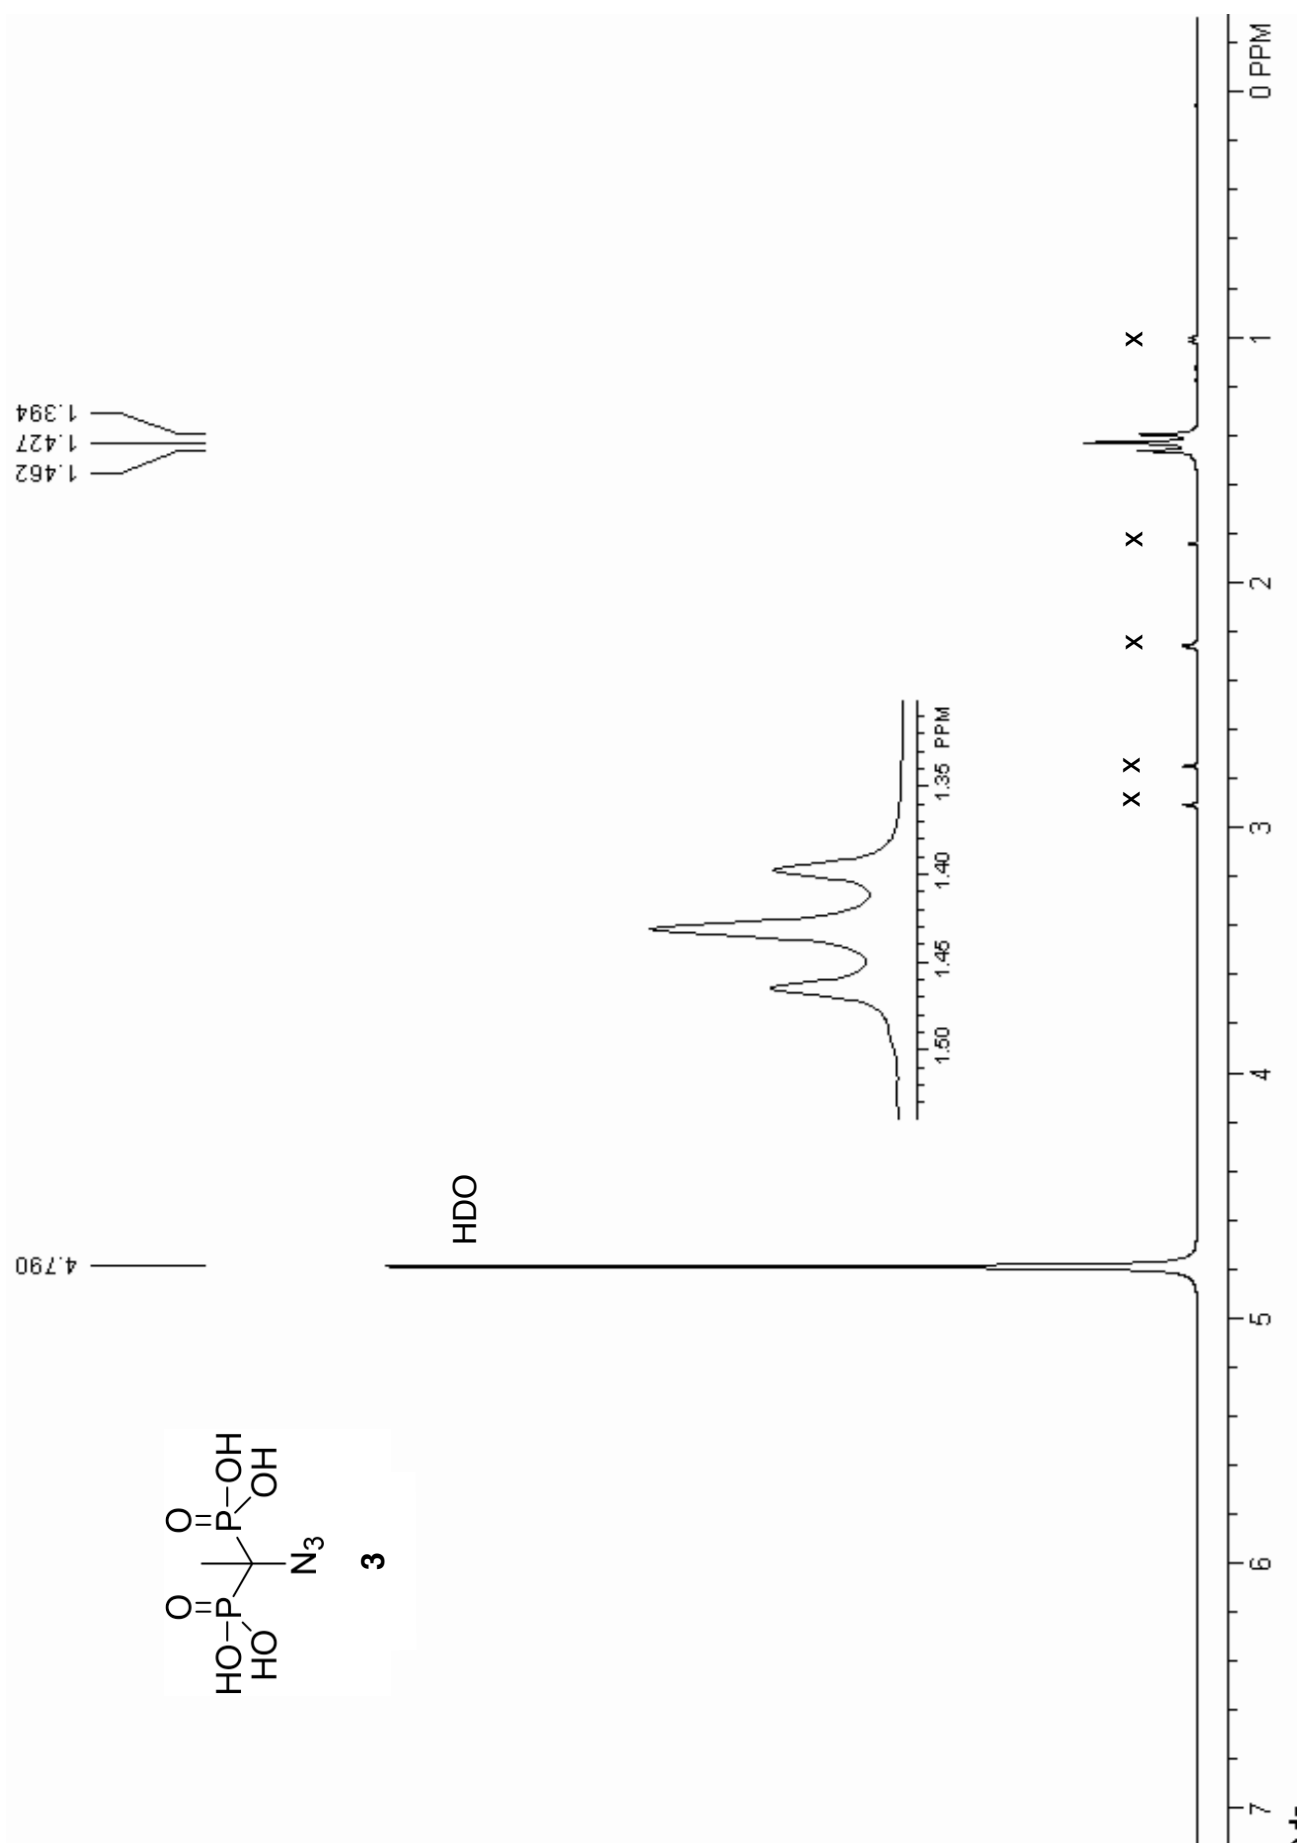

**Figure S12.**  $^{13}\text{C}$   $\{^1\text{H}\}$  NMR spectrum ( $\text{D}_2\text{O}$ , pH 10.88; 100.5 MHz) of **3**.

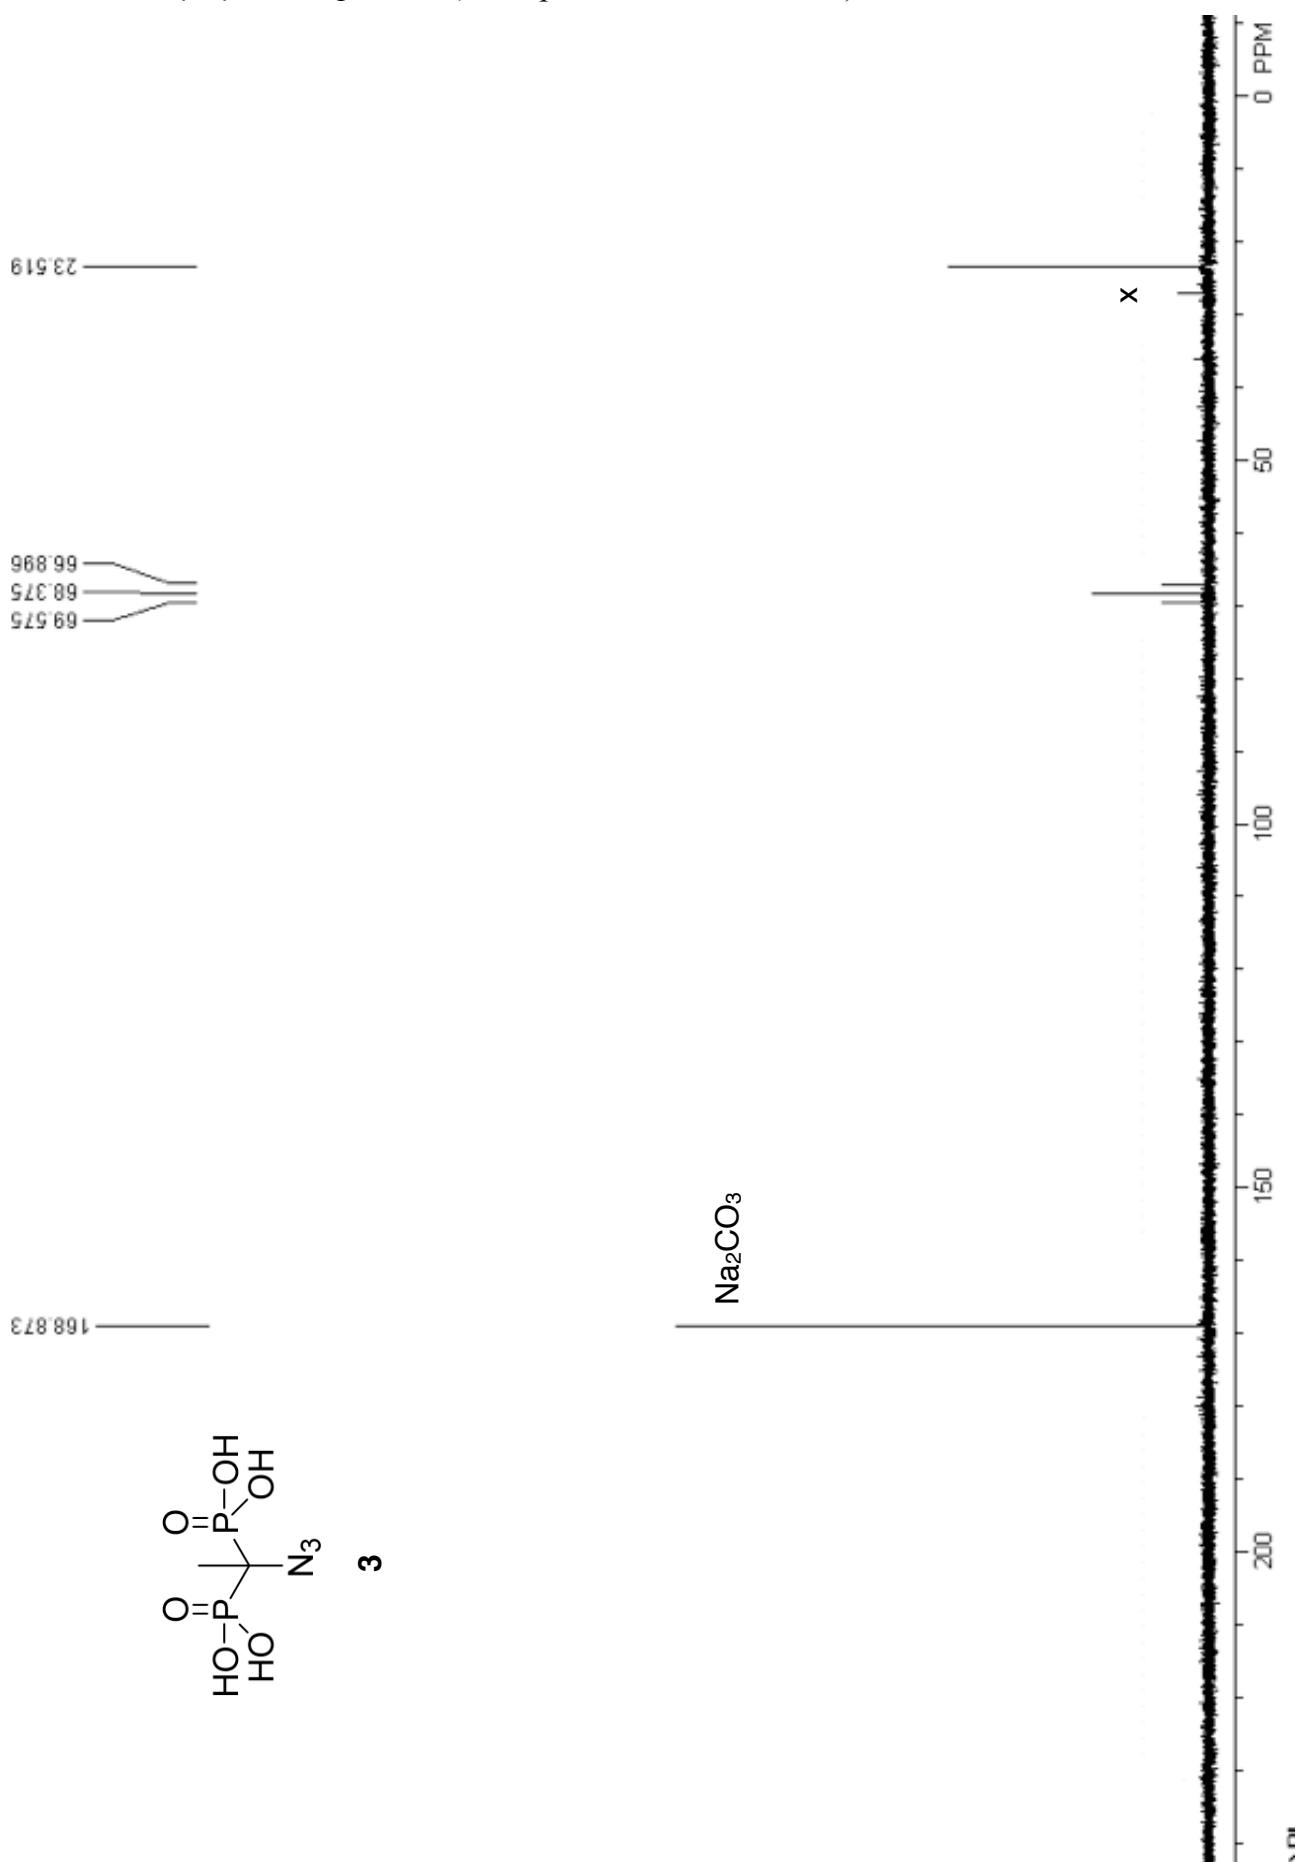

**Figure S13.**  $^{31}\text{P}$  NMR spectra ( $\text{D}_2\text{O}$ , pH 10.88; 161.9 MHz) of **3**.

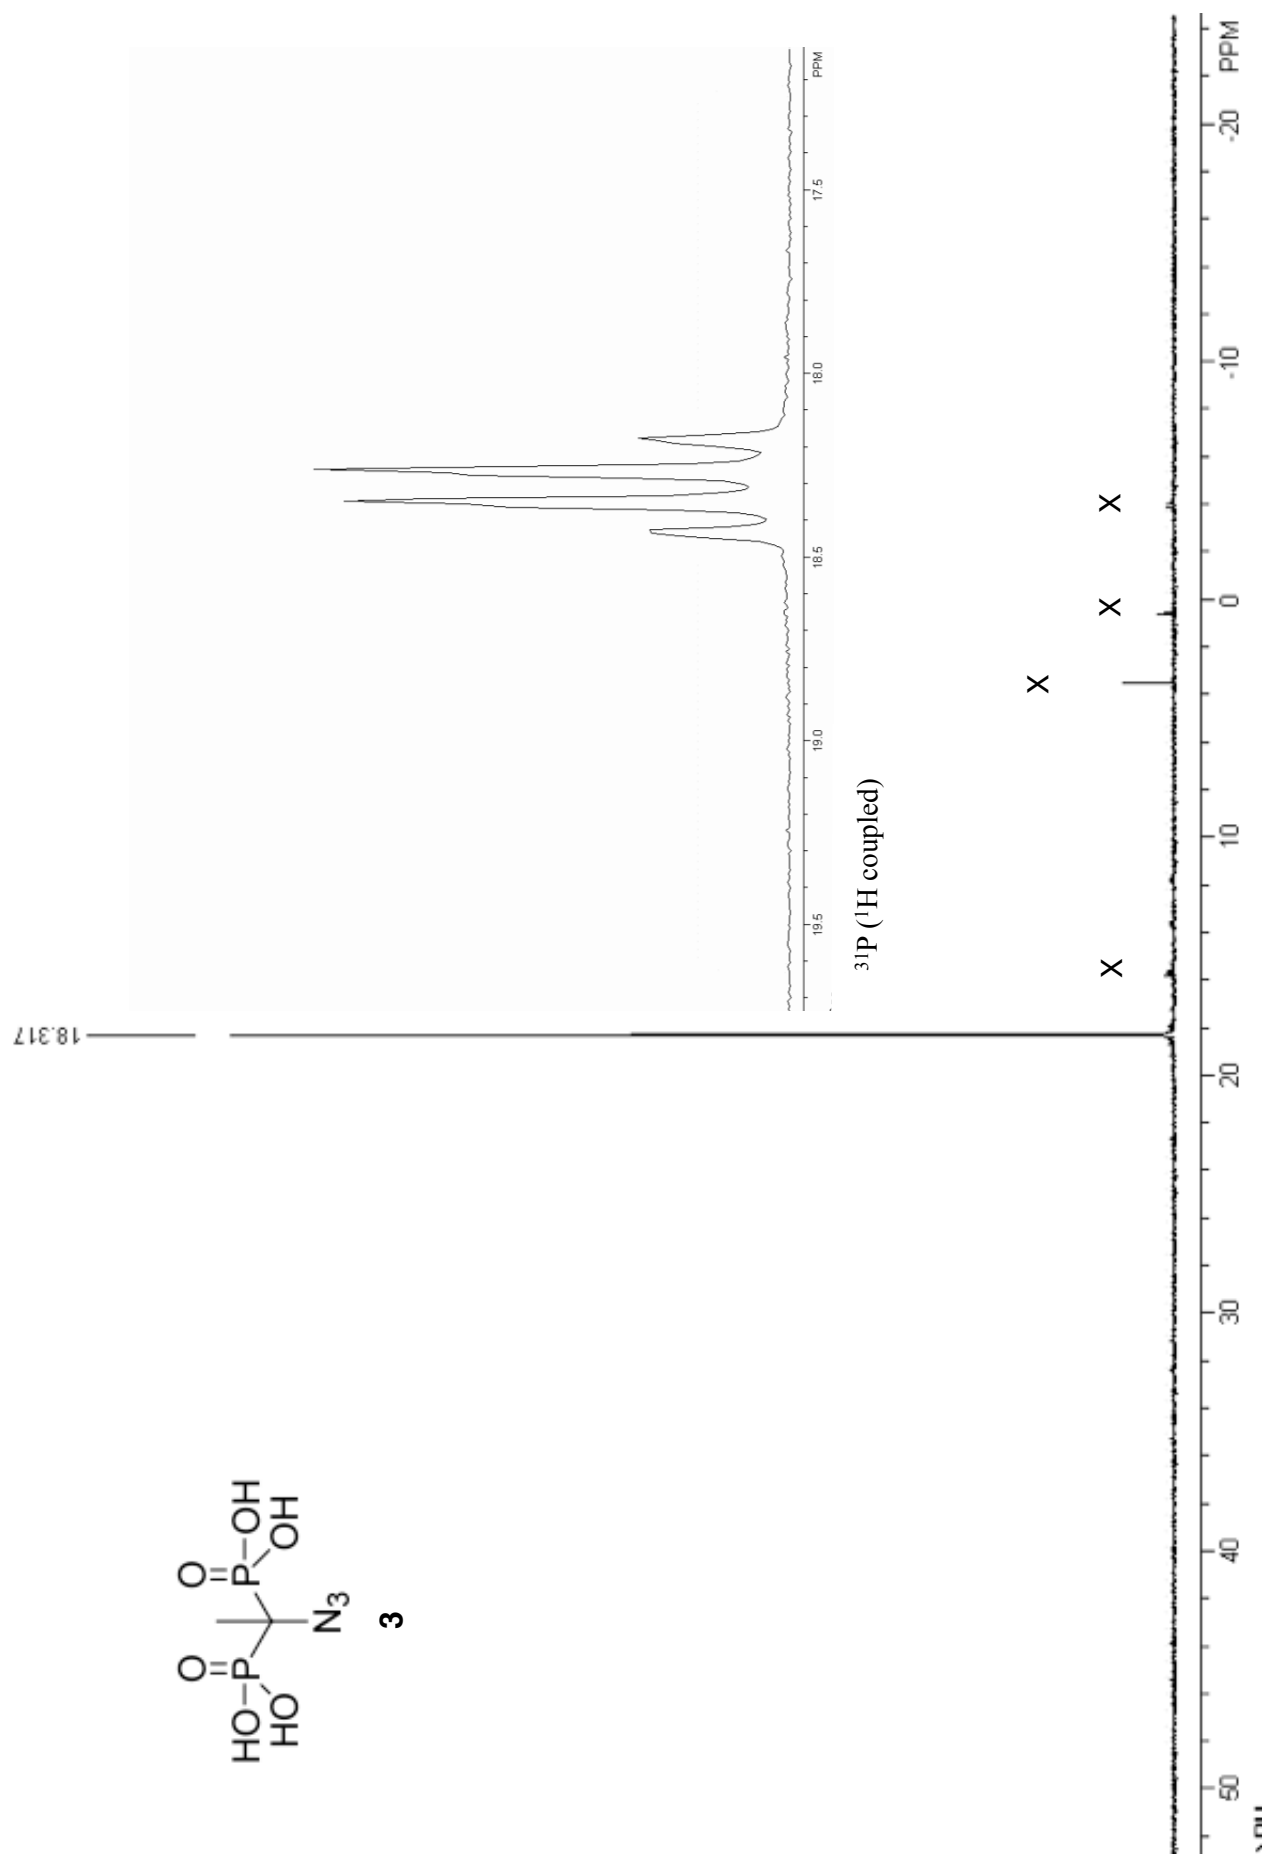



Figure S14. IR spectrum (KBr pellet) of **3**.

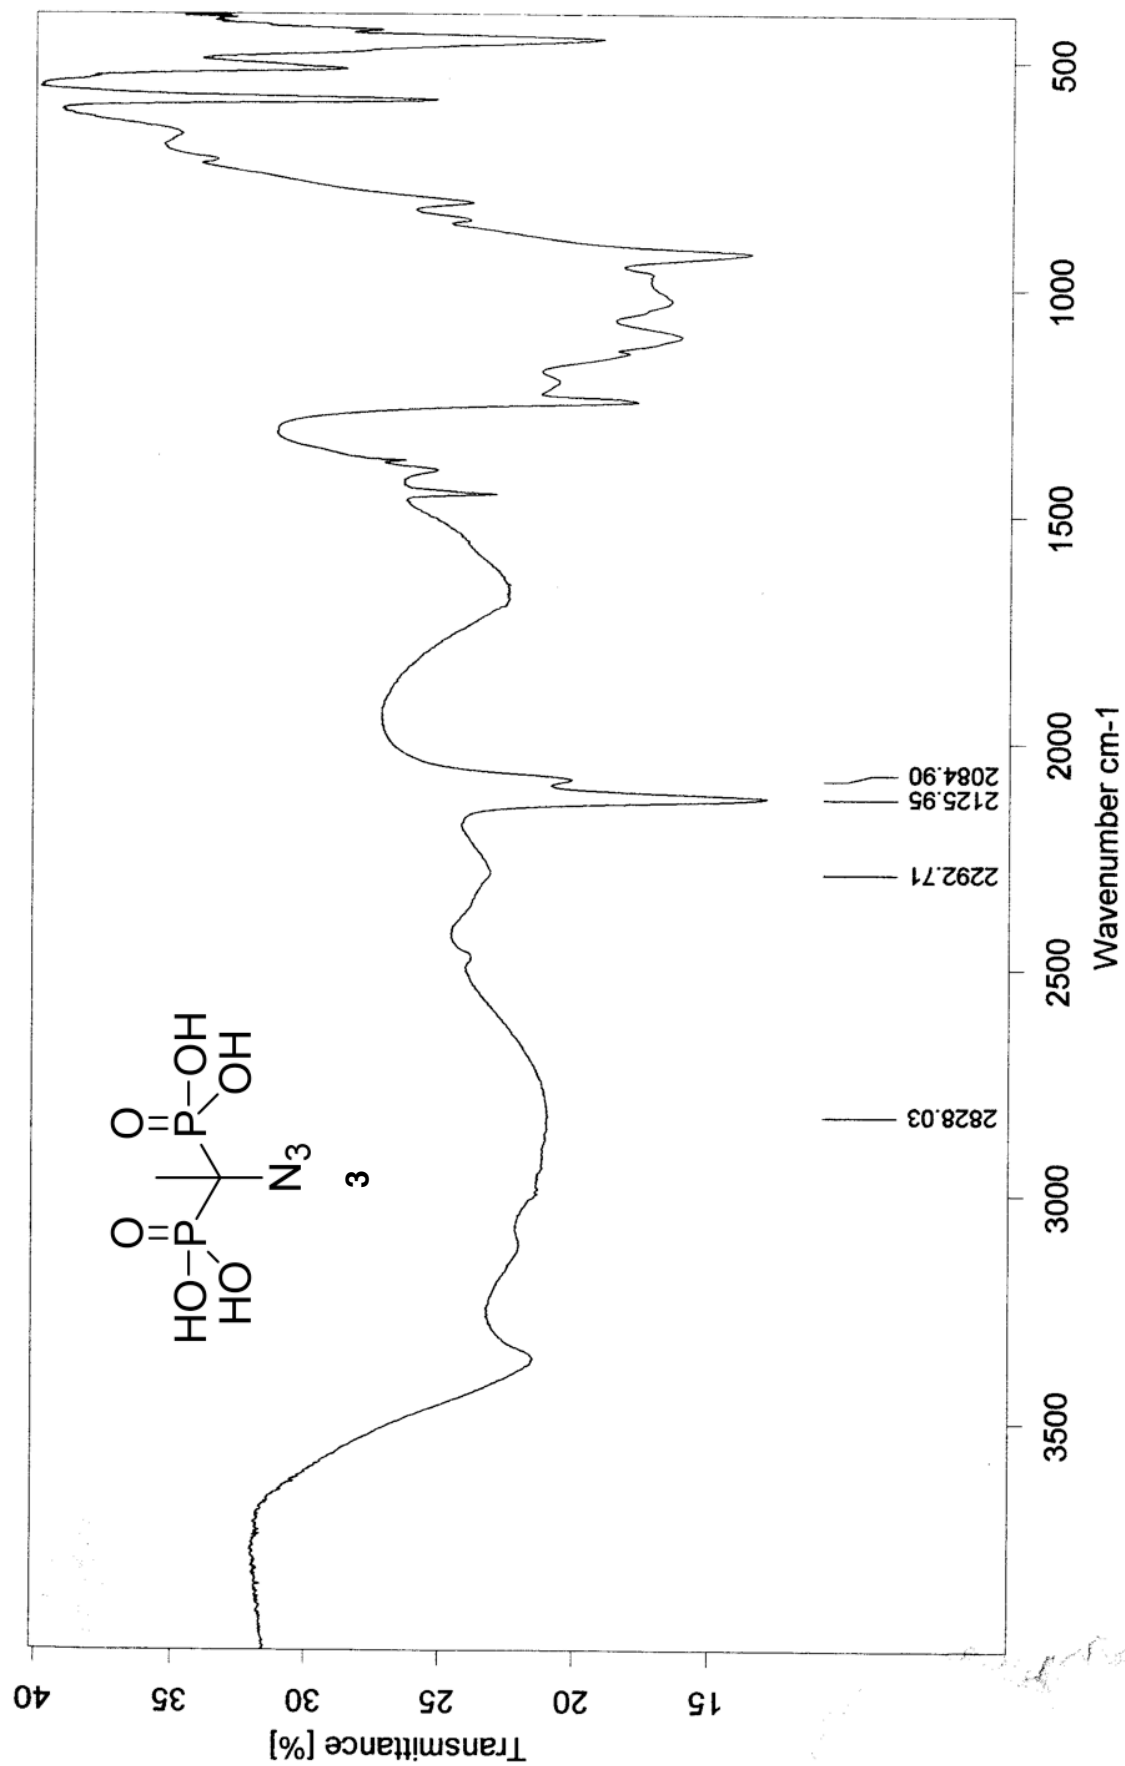

**Figure S15.** HRMS (ESI/ACPI) of **3**.

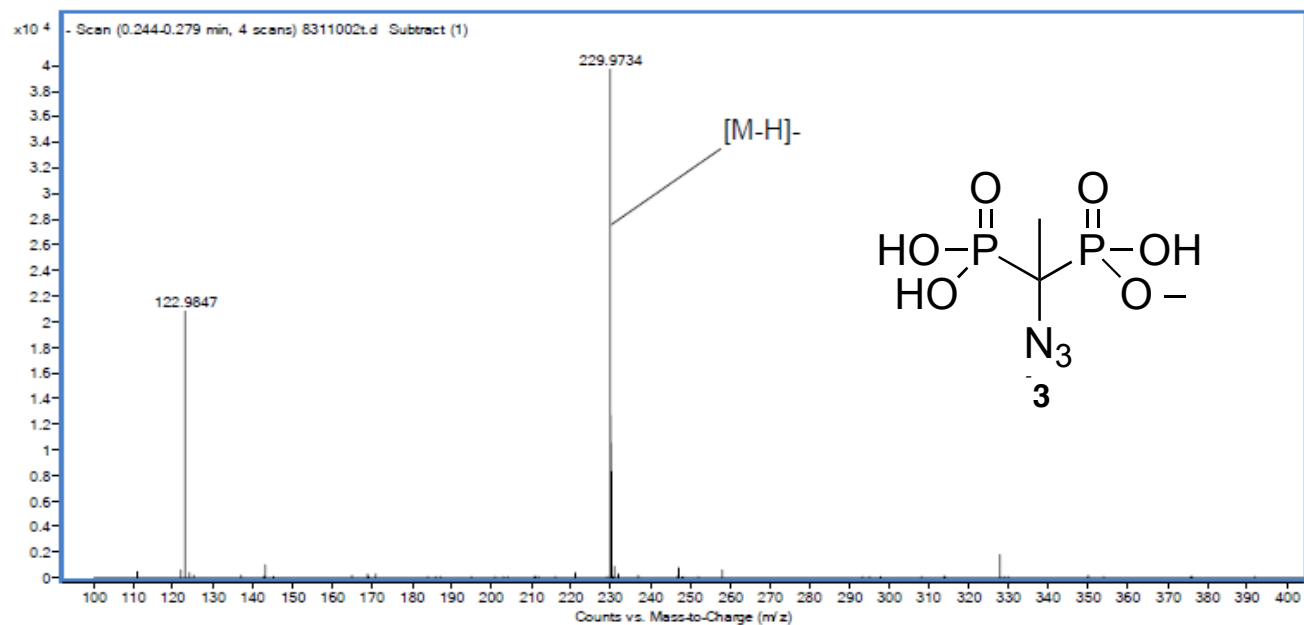

Measured Mass

229.9734

| <u>Element</u> | <u>Low Limit</u> | <u>High Limit</u> |
|----------------|------------------|-------------------|
| C              | 0                | 5                 |
| H              | 0                | 15                |
| N              | 0                | 5                 |
| O              | 4                | 8                 |
| P              | 0                | 2                 |

| <u>Formula</u> | <u>Calculated Mass</u> | <u>mDaError</u> | <u>ppmError</u> | <u>RDB</u> |
|----------------|------------------------|-----------------|-----------------|------------|
| C2 H6 N3 O6 P2 | 229.9737               | -0.3            | -1.5            | 2.5        |
| C4 H N5 O5 P   | 229.9721               | 1.3             | 5.7             | 7.5        |
| C4 H8 O7 P2    | 229.9751               | -1.7            | -7.3            | 2          |



**Figure S17.**  $^{13}\text{C}$   $\{^1\text{H}\}$  NMR spectrum ( $\text{D}_2\text{O}$ , pH 10.88; 100.5 MHz) of **4**.

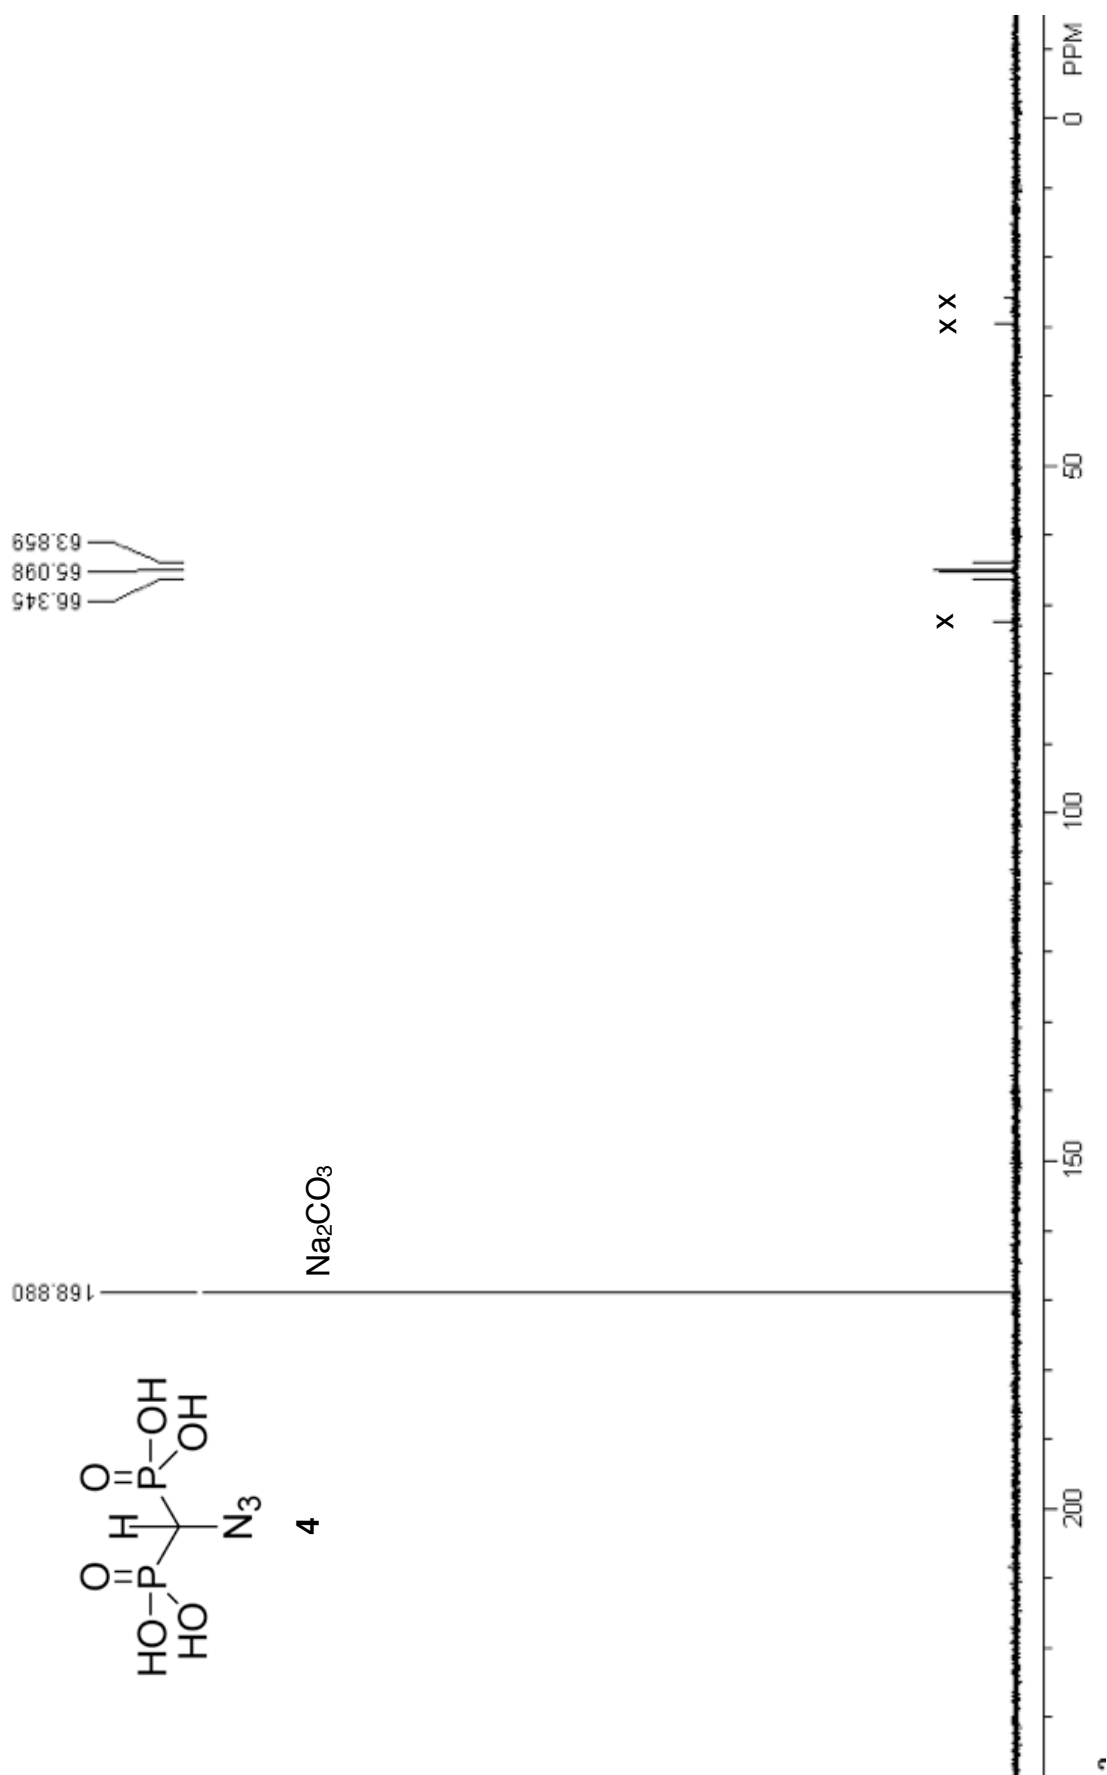

**Figure S18.**  $^{31}\text{P}$  NMR spectra ( $\text{D}_2\text{O}$ , pH 10.88; 161.9 MHz) of **4**.

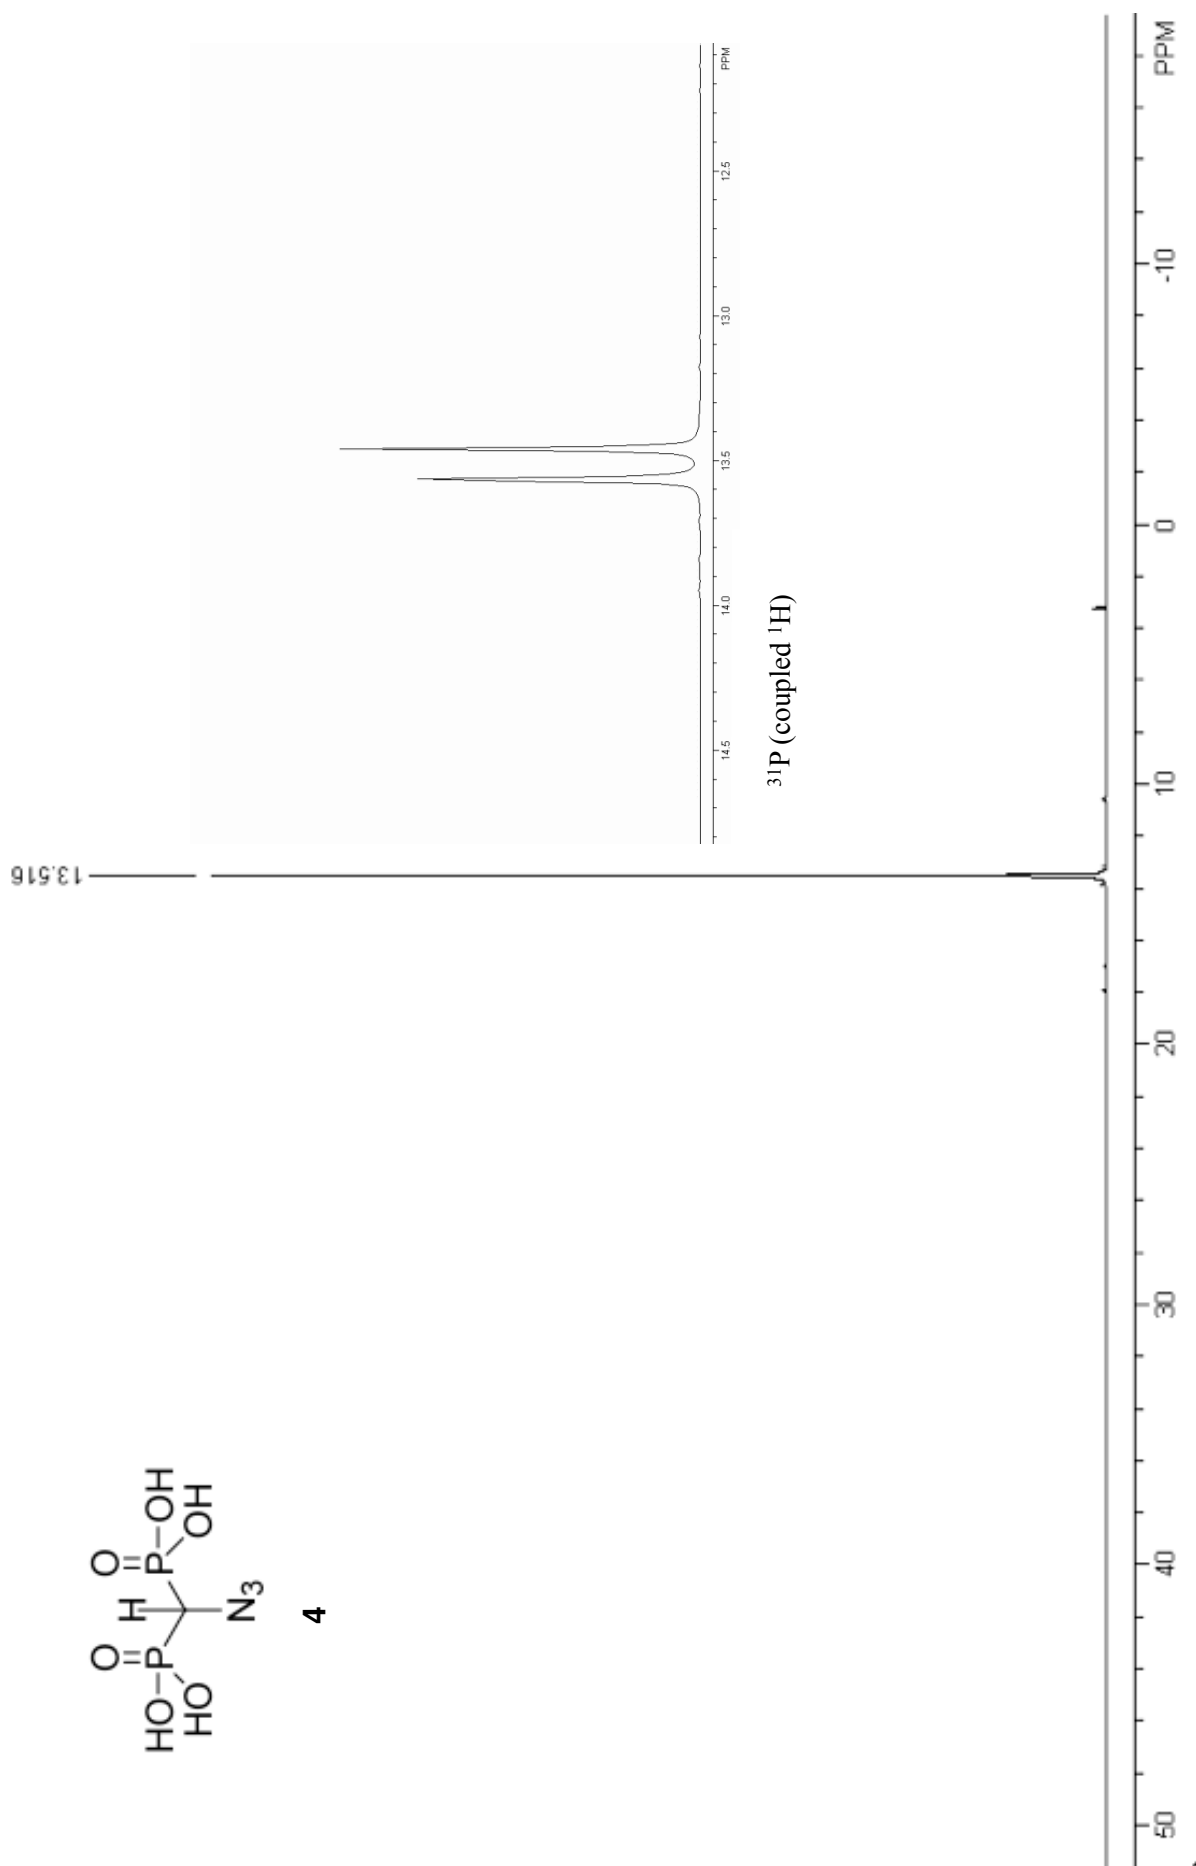

Figure S19. IR spectrum (KBr pellet) of 4.

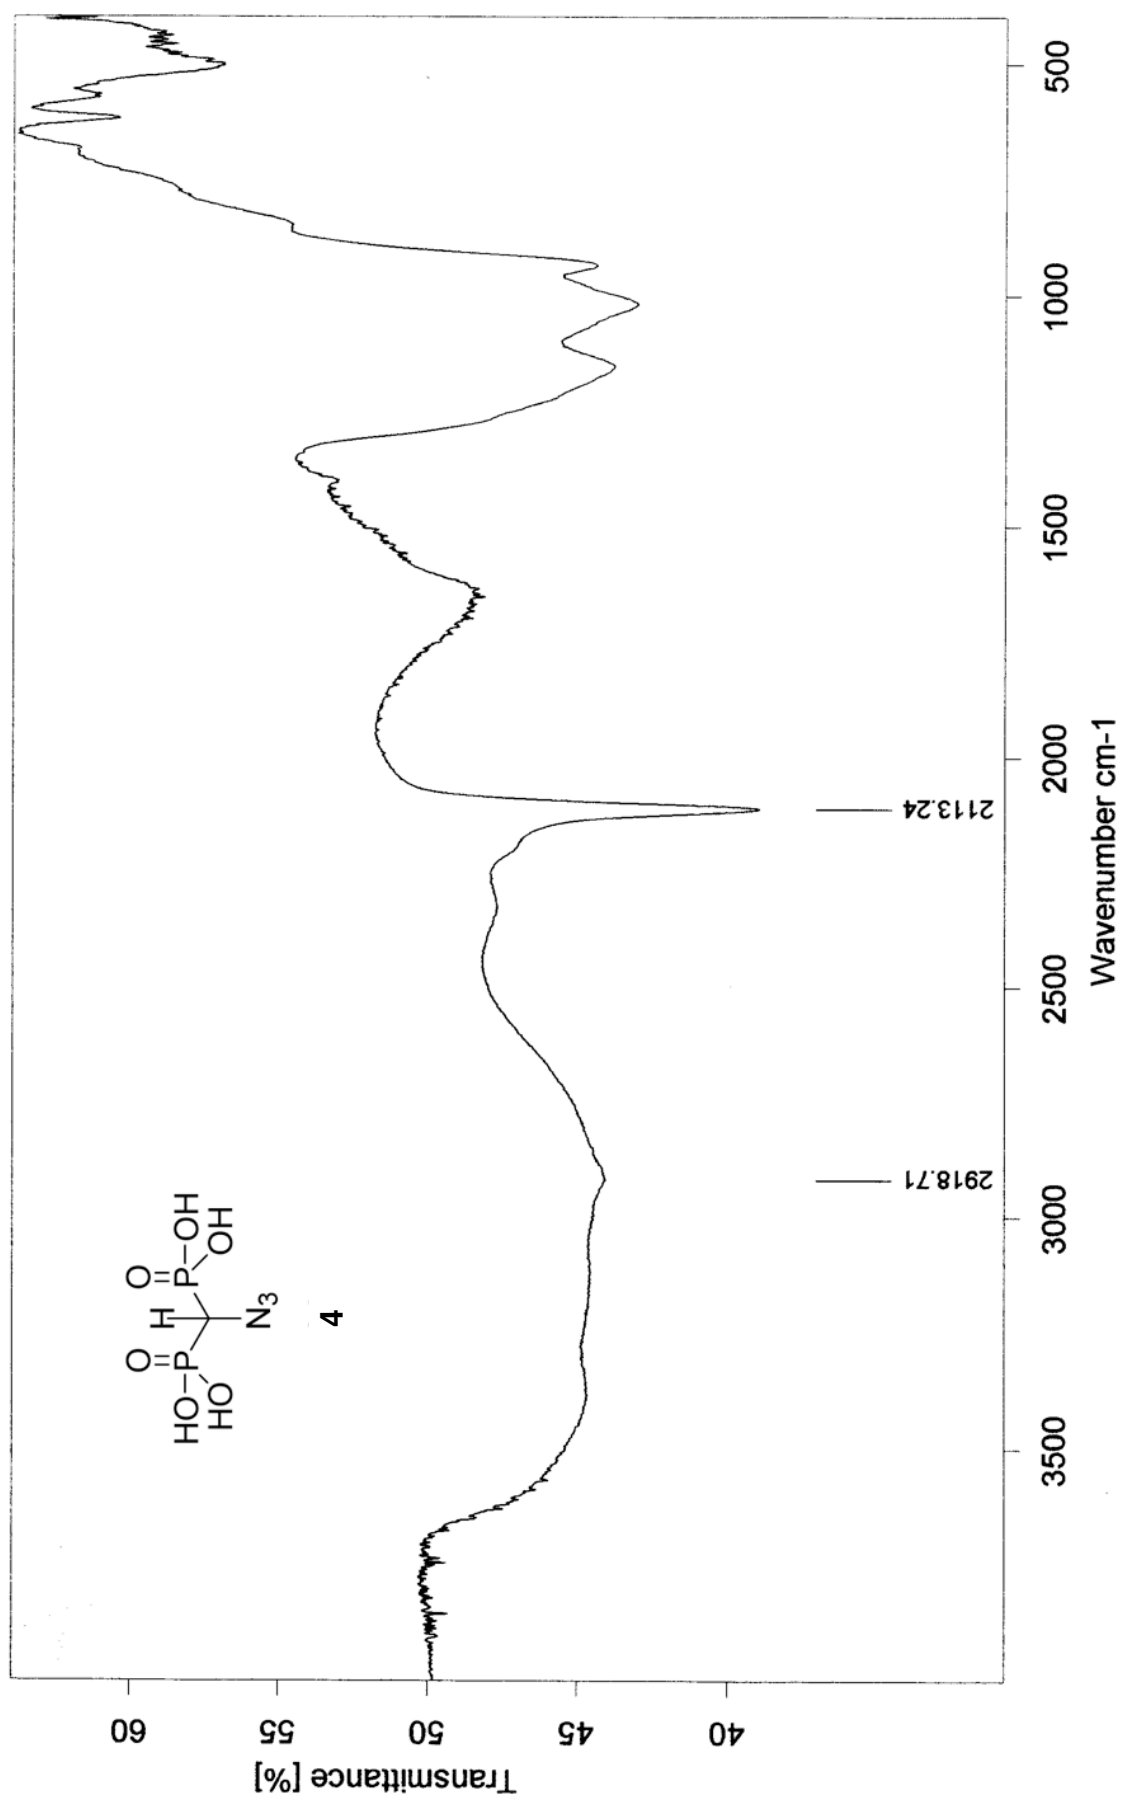

**Figure S20.** HRMS (ESI/ACPI) of **4**.

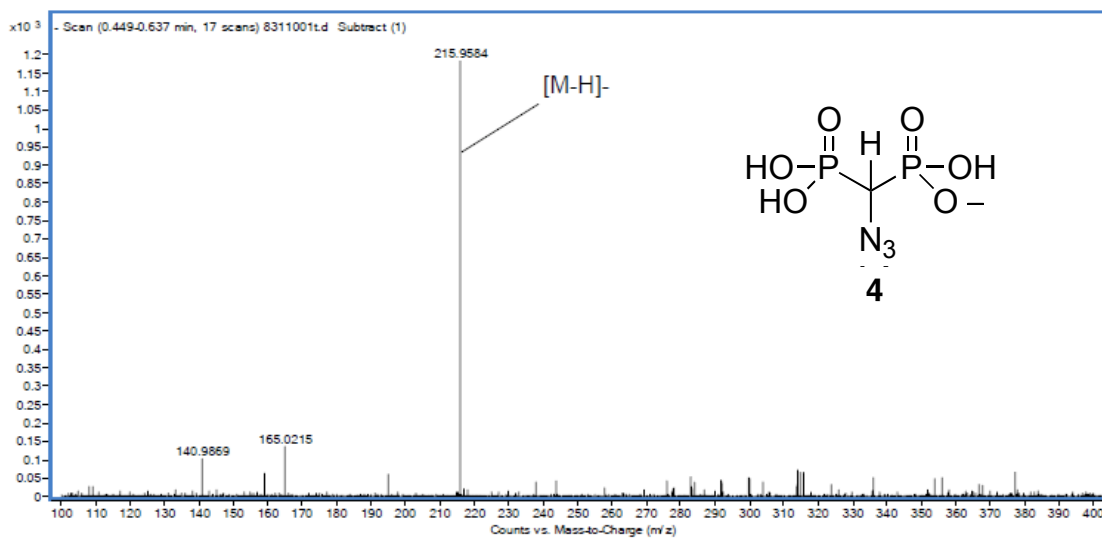

Measured Mass

215.9584

| <u>Element</u> | <u>Low Limit</u> | <u>High Limit</u> |
|----------------|------------------|-------------------|
| C              | 0                | 5                 |
| H              | 0                | 15                |
| N              | 0                | 5                 |
| O              | 4                | 8                 |
| P              | 0                | 2                 |

| <u>Formula</u>                                                             | <u>Calculated Mass</u> | <u>mDaError</u> | <u>ppmError</u> | <u>RDB</u> |
|----------------------------------------------------------------------------|------------------------|-----------------|-----------------|------------|
| C <sub>4</sub> H <sub>4</sub> N <sub>3</sub> O <sub>6</sub> P <sub>2</sub> | 215.9581               | 0.3             | 1.5             | 2.5        |
| C <sub>5</sub> H <sub>5</sub> N <sub>2</sub> O <sub>6</sub> P              | 215.9578               | 0.6             | 2.9             | 7          |
| C <sub>3</sub> H <sub>6</sub> O <sub>7</sub> P <sub>2</sub>                | 215.9594               | -1.0            | -4.8            | 2          |

**Figure S21.**  $^1\text{H}$  NMR spectrum ( $\text{D}_2\text{O}$ , pH 10.88; 399.8 MHz) of **5a/b**.

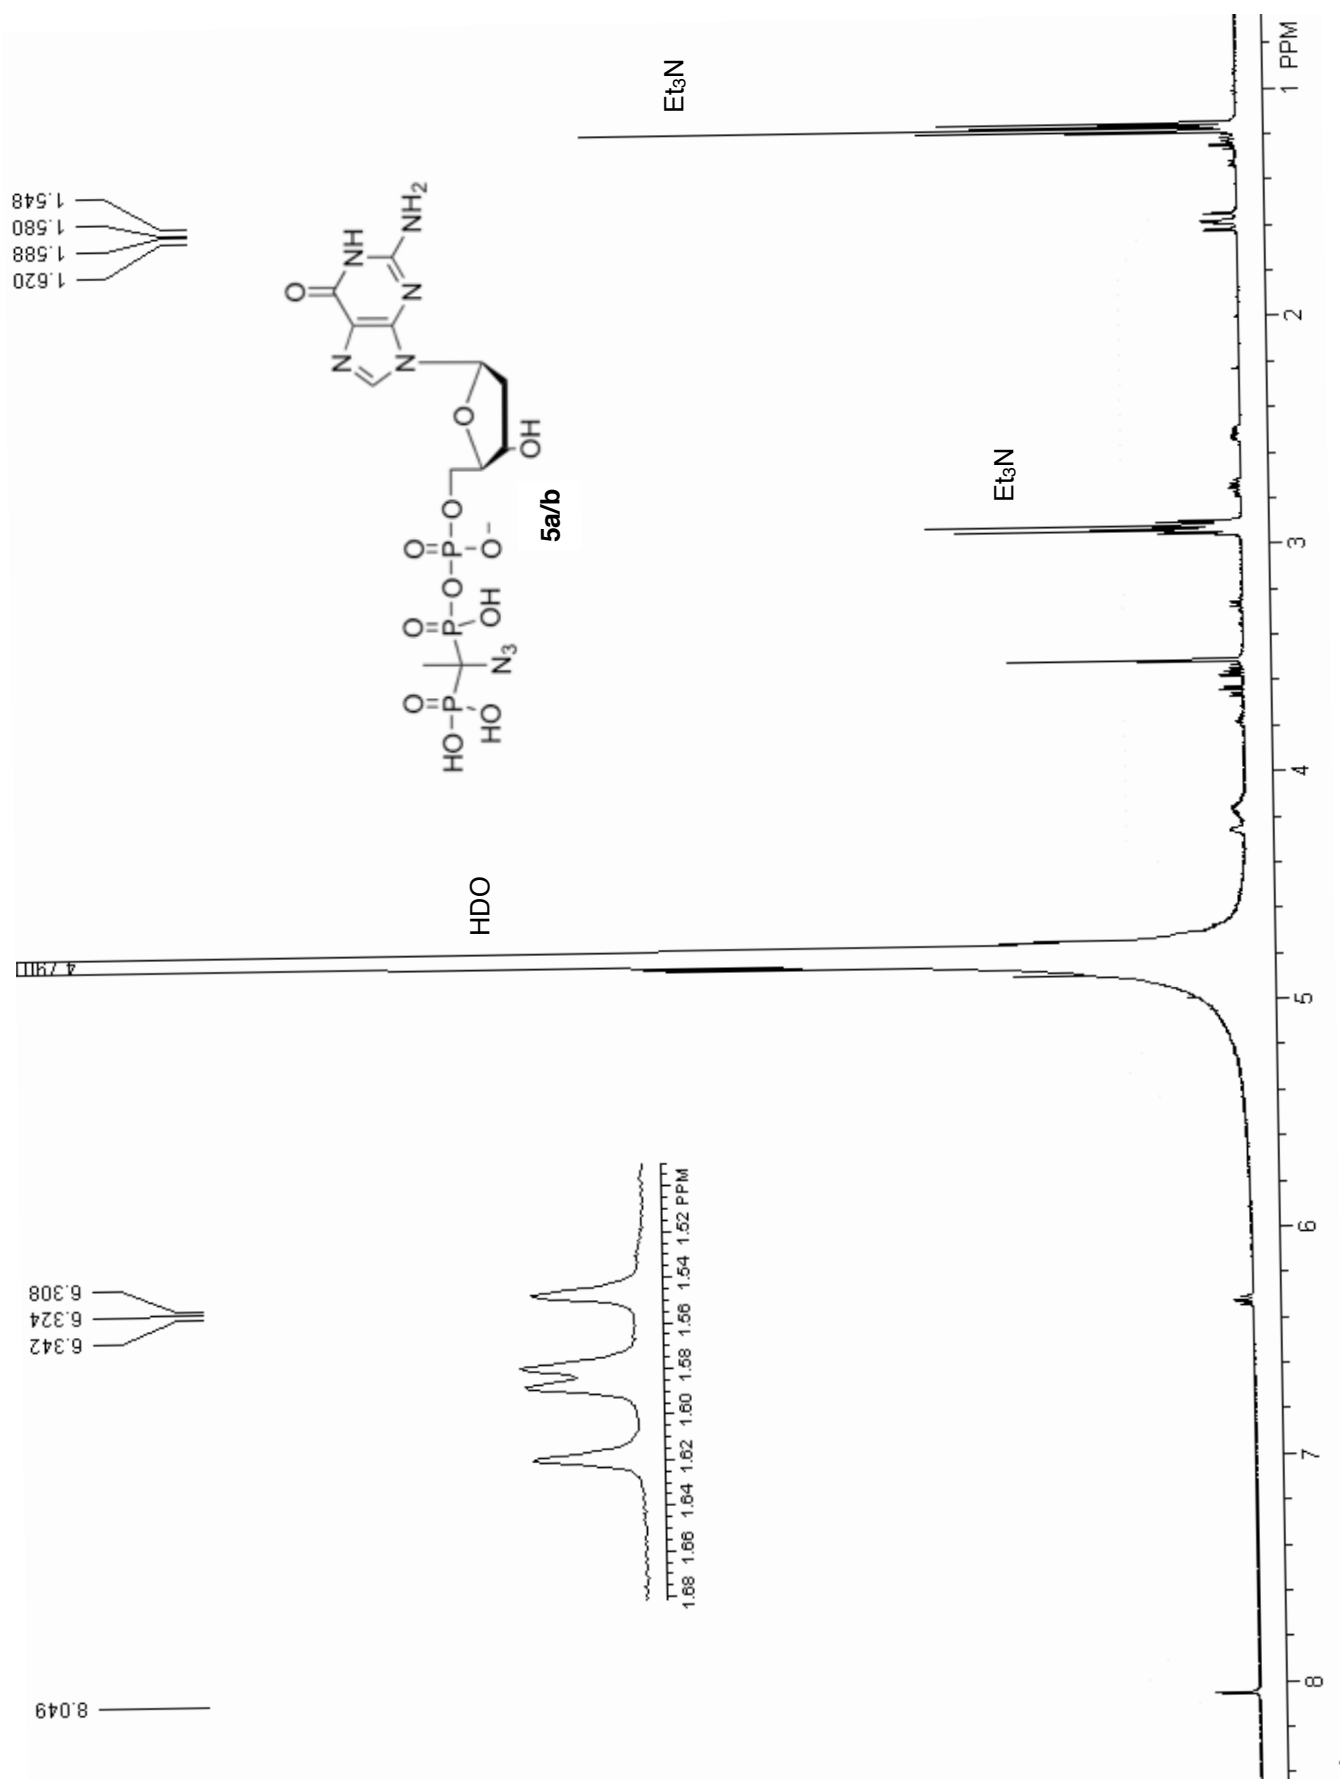



**Figure S22.**  $^{31}\text{P}$   $\{^1\text{H}\}$  NMR spectrum ( $\text{D}_2\text{O}$ , pH 10.88; 161.9 MHz) of **5a/b**.

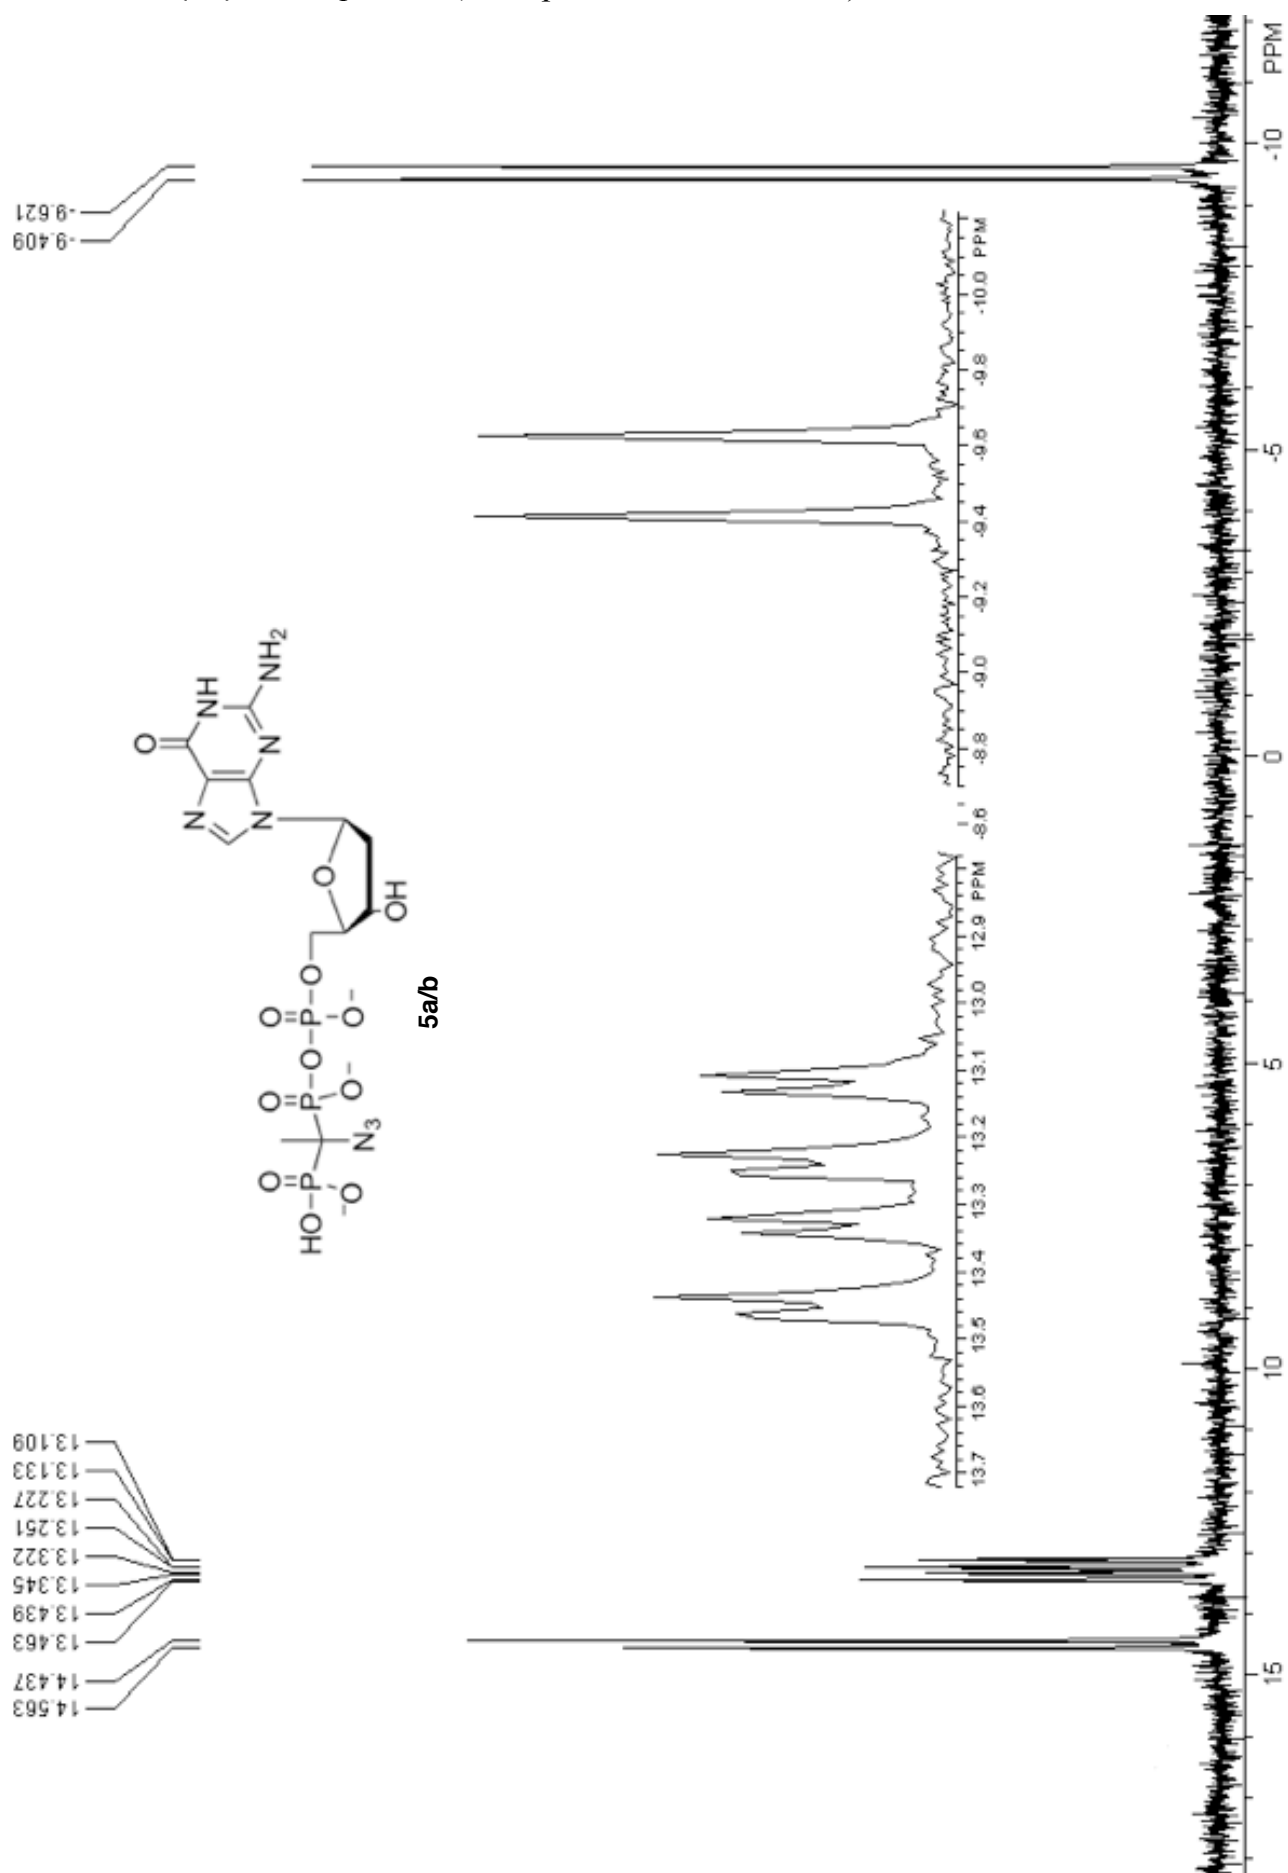

**Figure S23.**  $^{31}\text{P}\{^1\text{H}\}$  NMR of **5a/b**.

$\text{P}_\beta$  at 202.5 MHz (left) and 161.9 MHz (right), pH 10.88 confirming  $\delta$  vs.  $J$  assignments. The chemical shifts in the spectrum were normalized to Figure S20.

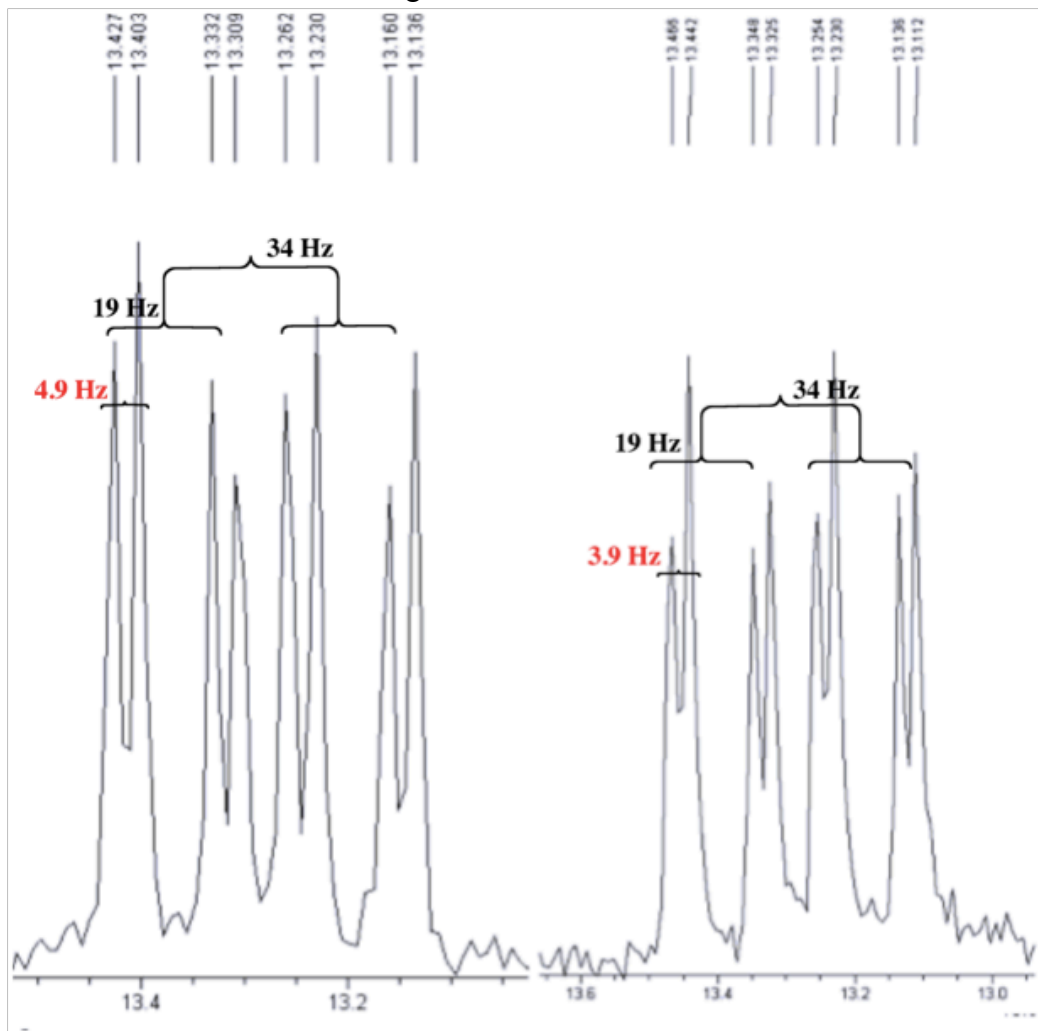

**Figure S24.** HRMS (ESI/ACPI) of **5a/b**.

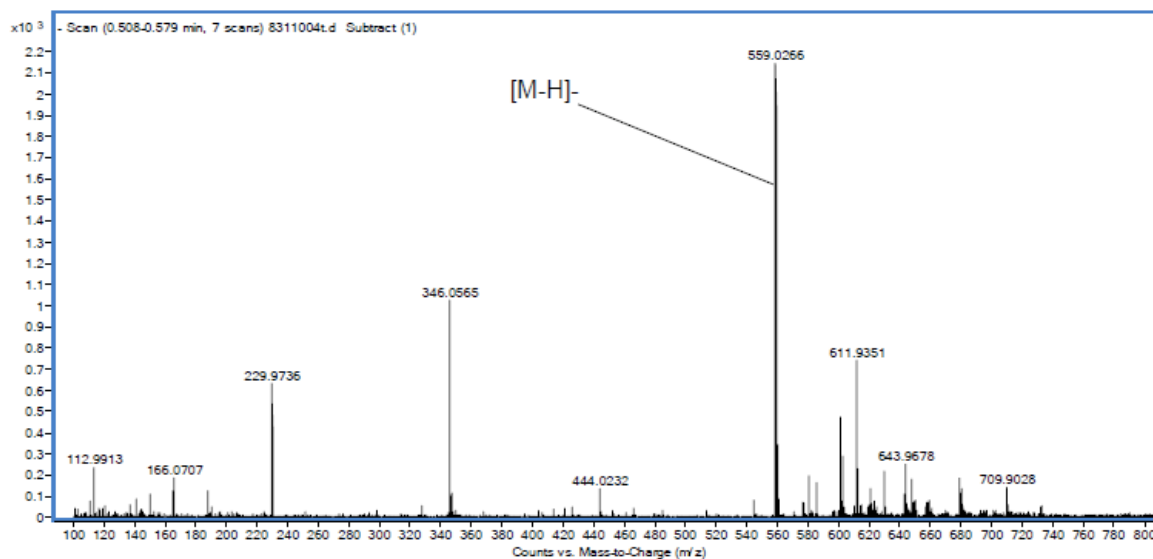

Measured Mass 559.0266

| <u>Element</u> | <u>Low Limit</u> | <u>High Limit</u> |
|----------------|------------------|-------------------|
| C              | 6                | 16                |
| H              | 5                | 25                |
| N              | 6                | 10                |
| O              | 10               | 14                |
| P              | 0                | 3                 |

| <u>Formula</u>                                                                 | <u>Calculated Mass</u> | <u>mDaError</u> | <u>ppmError</u> | <u>RDB</u> |
|--------------------------------------------------------------------------------|------------------------|-----------------|-----------------|------------|
| C <sub>12</sub> H <sub>18</sub> N <sub>8</sub> O <sub>12</sub> P <sub>3</sub>  | 559.0263               | 0.3             | 0.6             | 9.5        |
| C <sub>16</sub> H <sub>15</sub> N <sub>7</sub> O <sub>12</sub> P <sub>2</sub>  | 559.0259               | 0.7             | 1.2             | 14         |
| C <sub>14</sub> H <sub>13</sub> N <sub>10</sub> O <sub>11</sub> P <sub>2</sub> | 559.0246               | 2.0             | 3.6             | 14.5       |
| C <sub>7</sub> H <sub>18</sub> N <sub>10</sub> O <sub>14</sub> P <sub>3</sub>  | 559.0222               | 4.4             | 7.8             | 5.5        |
| C <sub>11</sub> H <sub>15</sub> N <sub>9</sub> O <sub>14</sub> P <sub>2</sub>  | 559.0219               | 4.7             | 8.4             | 10         |
| C <sub>15</sub> H <sub>12</sub> N <sub>8</sub> O <sub>14</sub> P               | 559.0216               | 5.0             | 8.9             | 14.5       |

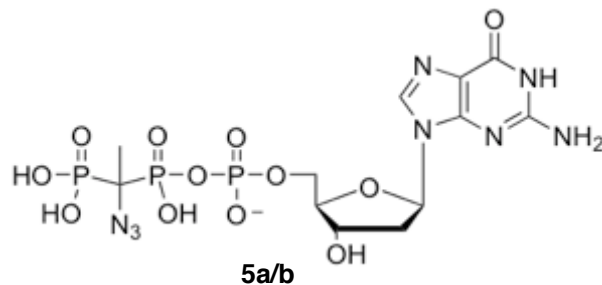

**Figure S25.**  $^1\text{H}$  NMR spectrum ( $\text{D}_2\text{O}$ , pH 10.88; 399.8 MHz) of **6a/b**.

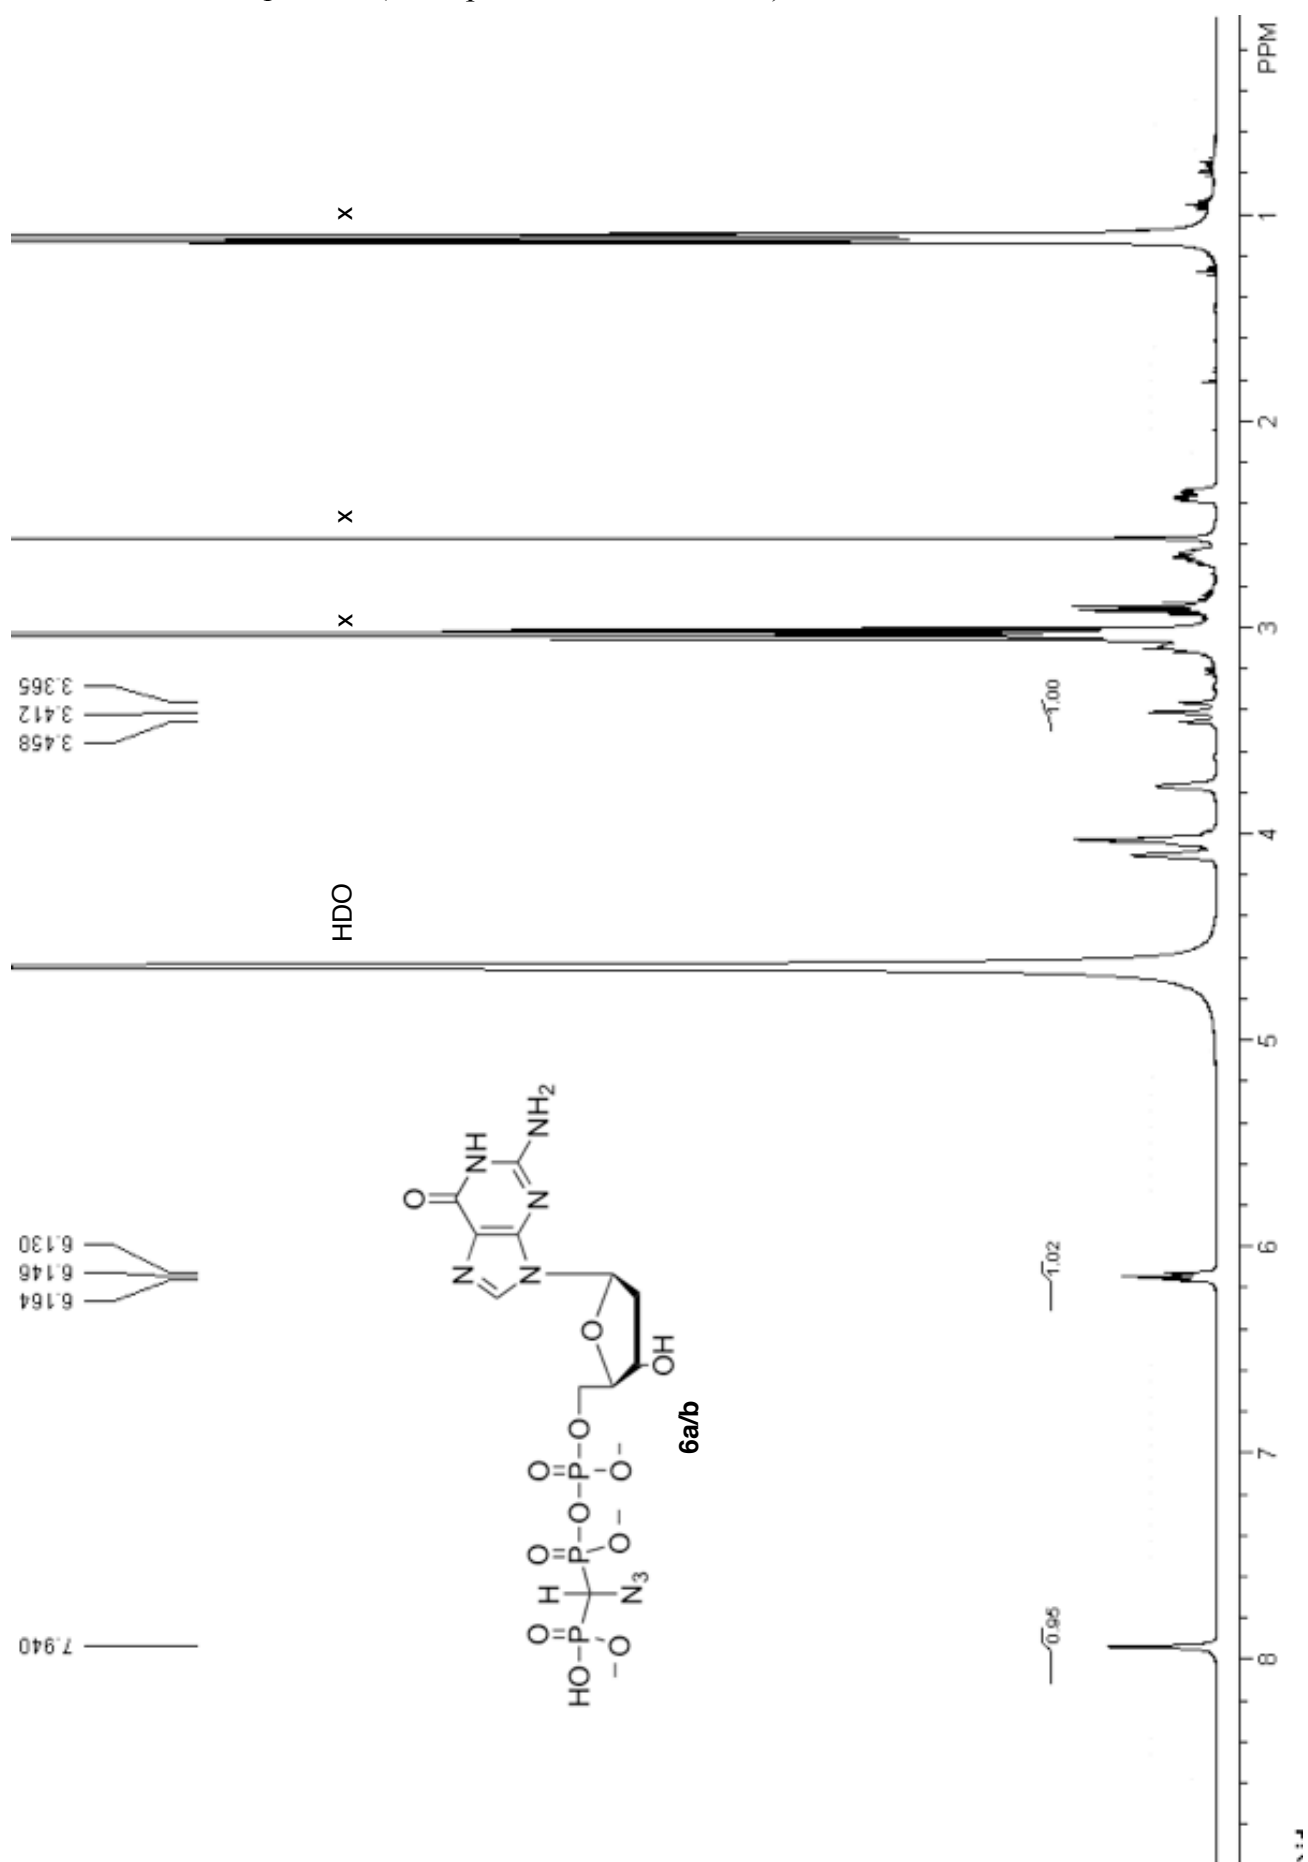

Figure S26.  $^{31}\text{P}$   $\{^1\text{H}\}$  NMR spectrum ( $\text{D}_2\text{O}$ , pH 10.88; 161.9 MHz) of **6a/b**.

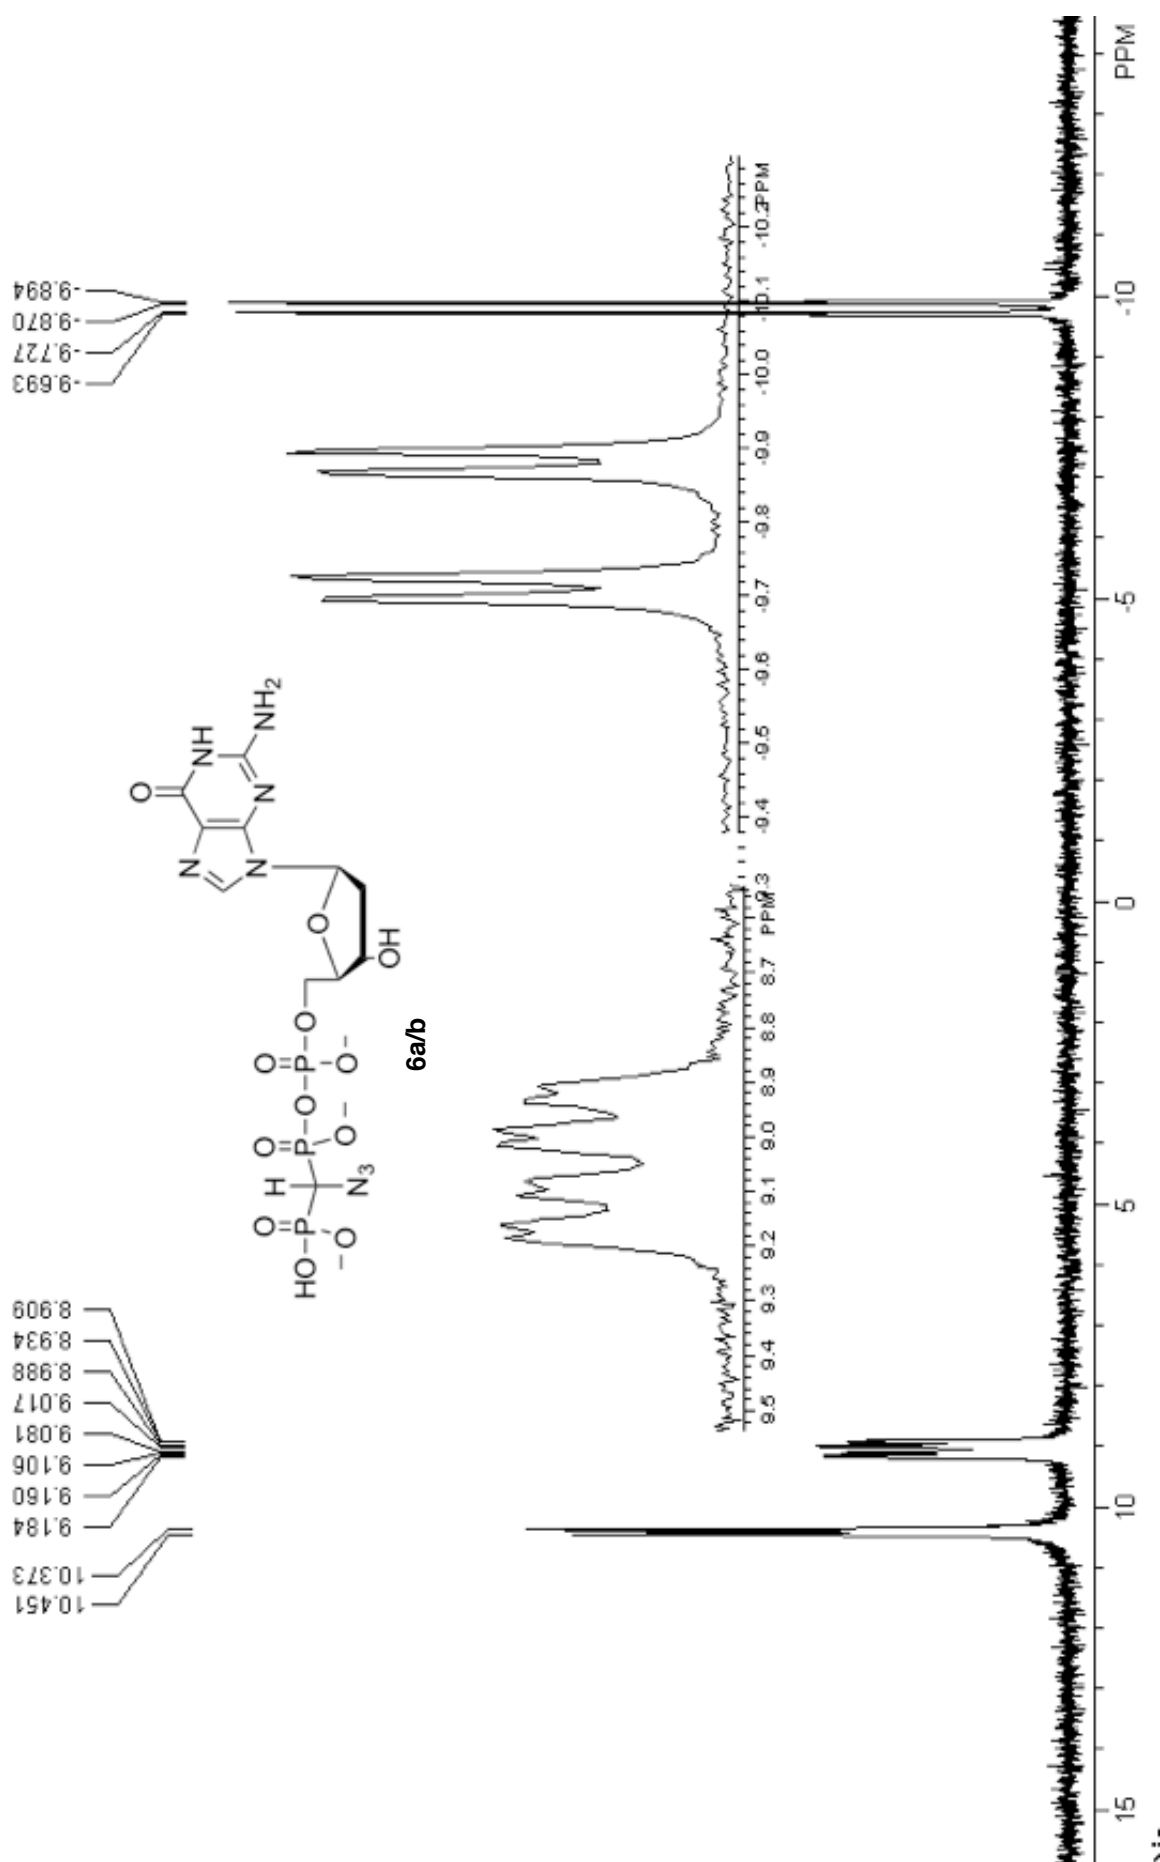

**Figure S27.** HRMS (ESI/ACPI) of **6a/b**.

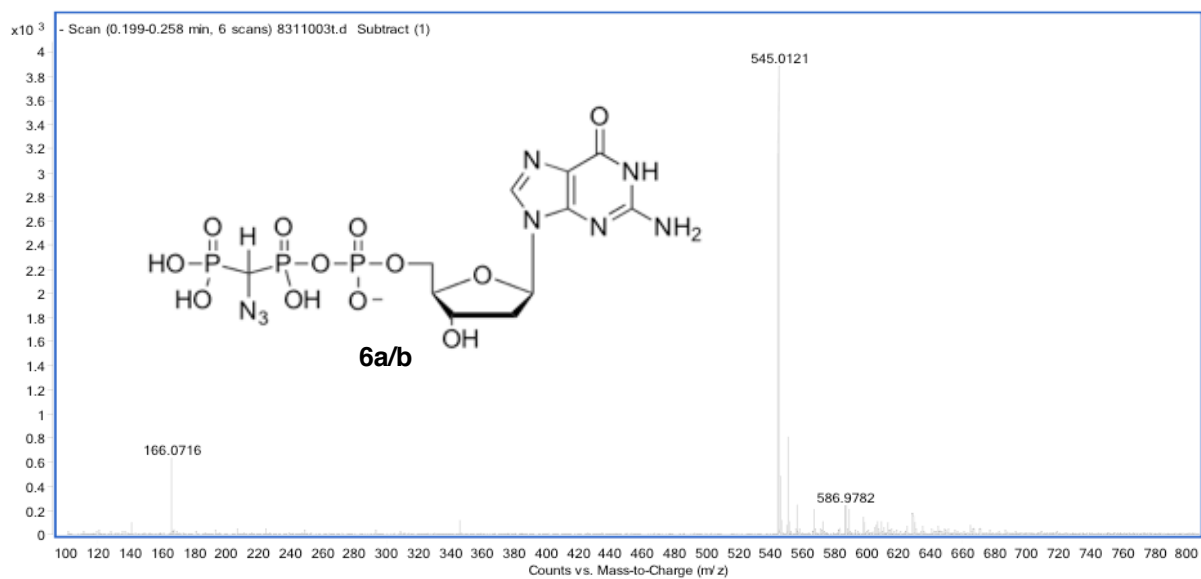

Measured Mass 545.0121

| <u>Element</u> | <u>Low Limit</u> | <u>High Limit</u> |
|----------------|------------------|-------------------|
| C              | 6                | 16                |
| H              | 5                | 25                |
| N              | 6                | 10                |
| O              | 10               | 14                |
| P              | 0                | 3                 |

| <u>Formula</u>     | <u>Calculated Mass</u> | <u>mDaError</u> | <u>ppmError</u> | <u>RDB</u> |
|--------------------|------------------------|-----------------|-----------------|------------|
| C11 H16 N8 O12 P3  | 545.0106               | 1.5             | 2.7             | 9.5        |
| C15 H13 N7 O12 P2  | 545.0103               | 1.8             | 3.3             | 14         |
| C16 H16 N6 O10 P3  | 545.0146               | -2.5            | -4.6            | 13.5       |
| C13 H11 N10 O11 P2 | 545.0090               | 3.1             | 5.8             | 14.5       |
| C13 H10 N10 O13 P  | 545.0172               | -5.1            | -9.3            | 14.5       |

**Figure S28.**  $^{31}\text{P}$  NMR spectrum ( $\text{D}_2\text{O}$ , pH 10.88; 161.9 MHz) of **14a**.

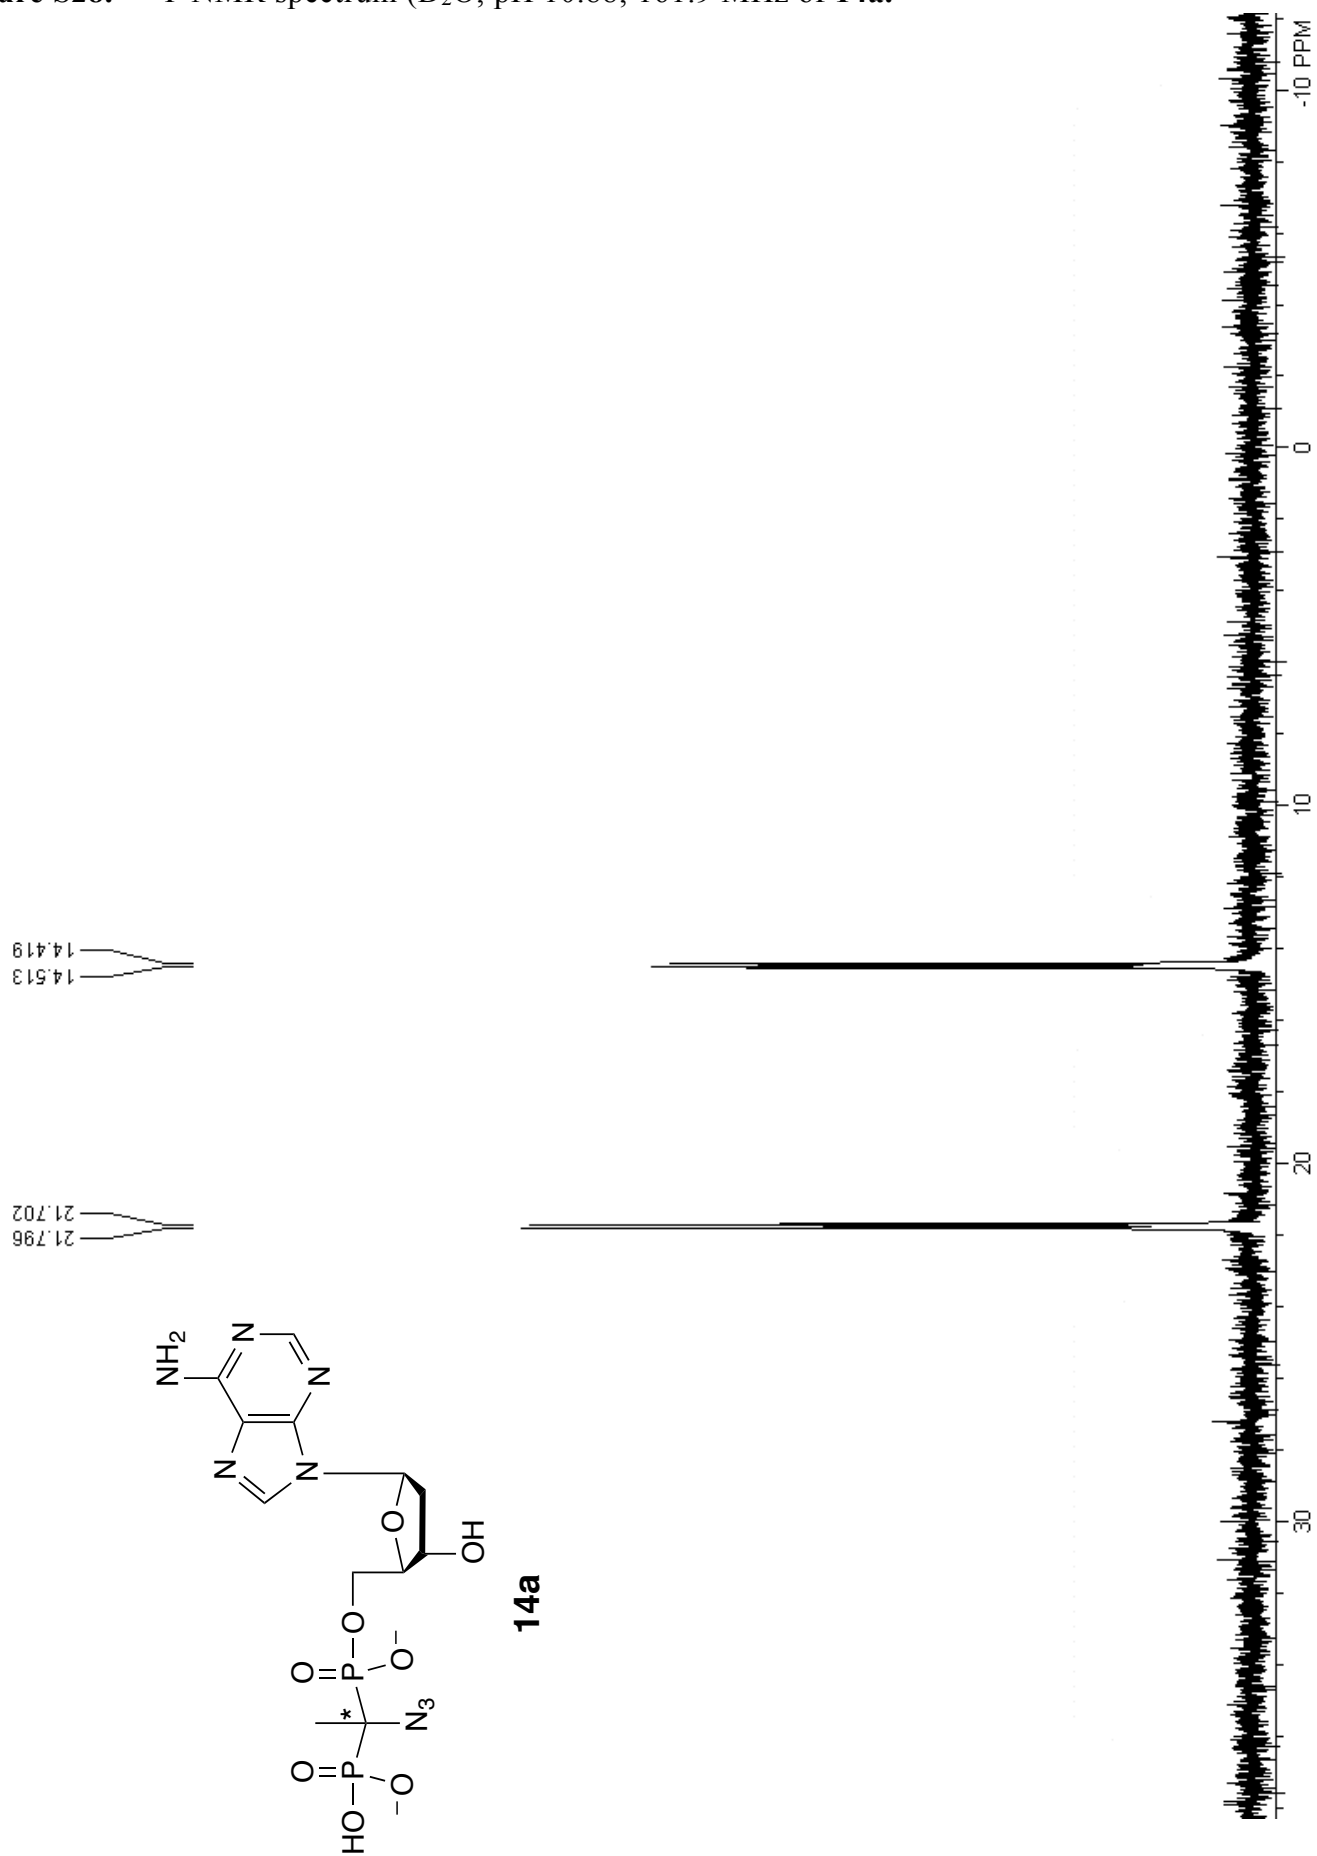

**Figure S29.**  $^{31}\text{P}$  NMR spectrum ( $\text{D}_2\text{O}$ , pH 10.88; 161.9 MHz) of **14b**.

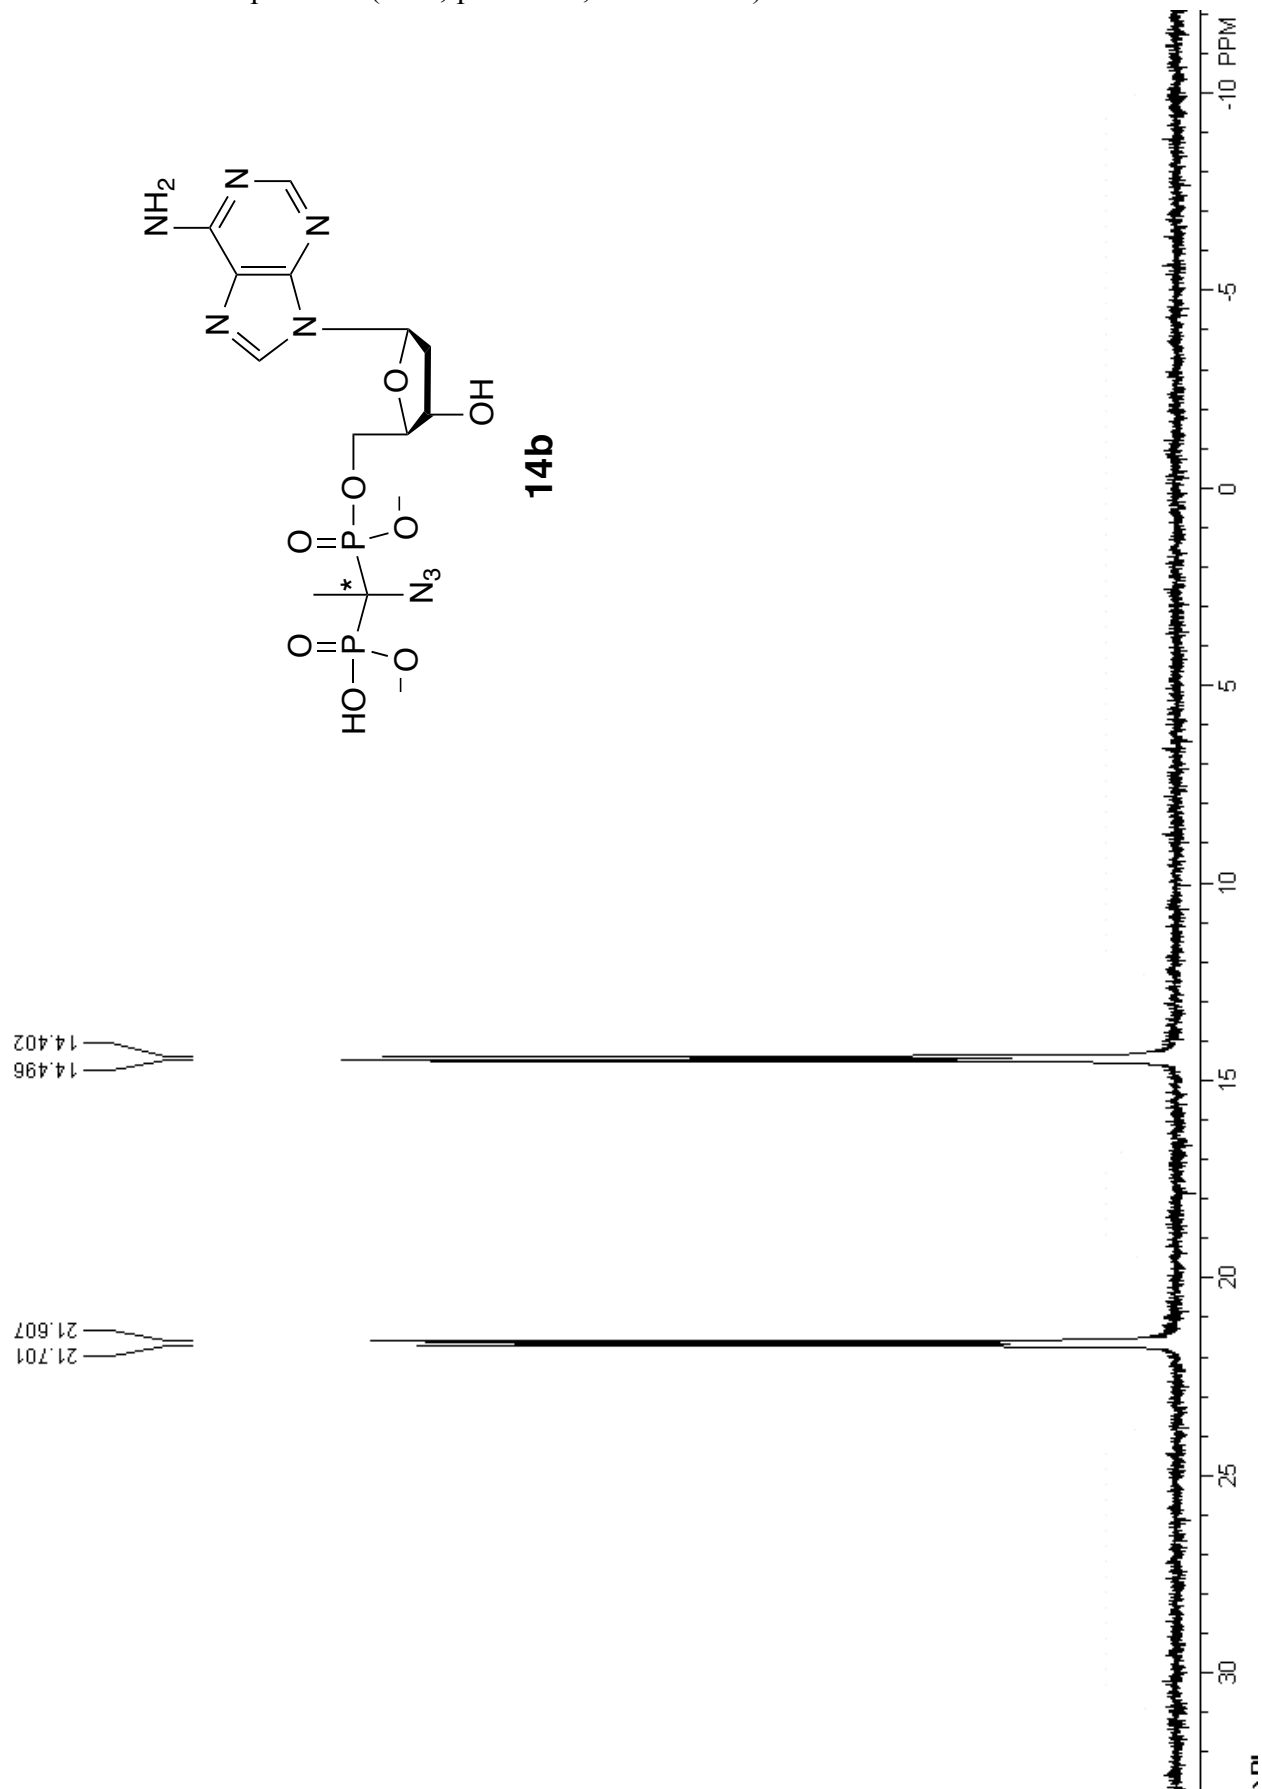



Figure S30.  $^1\text{H}$  NMR spectrum ( $\text{D}_2\text{O}$ , pH 10.88; 399.8 MHz) of **14a**.

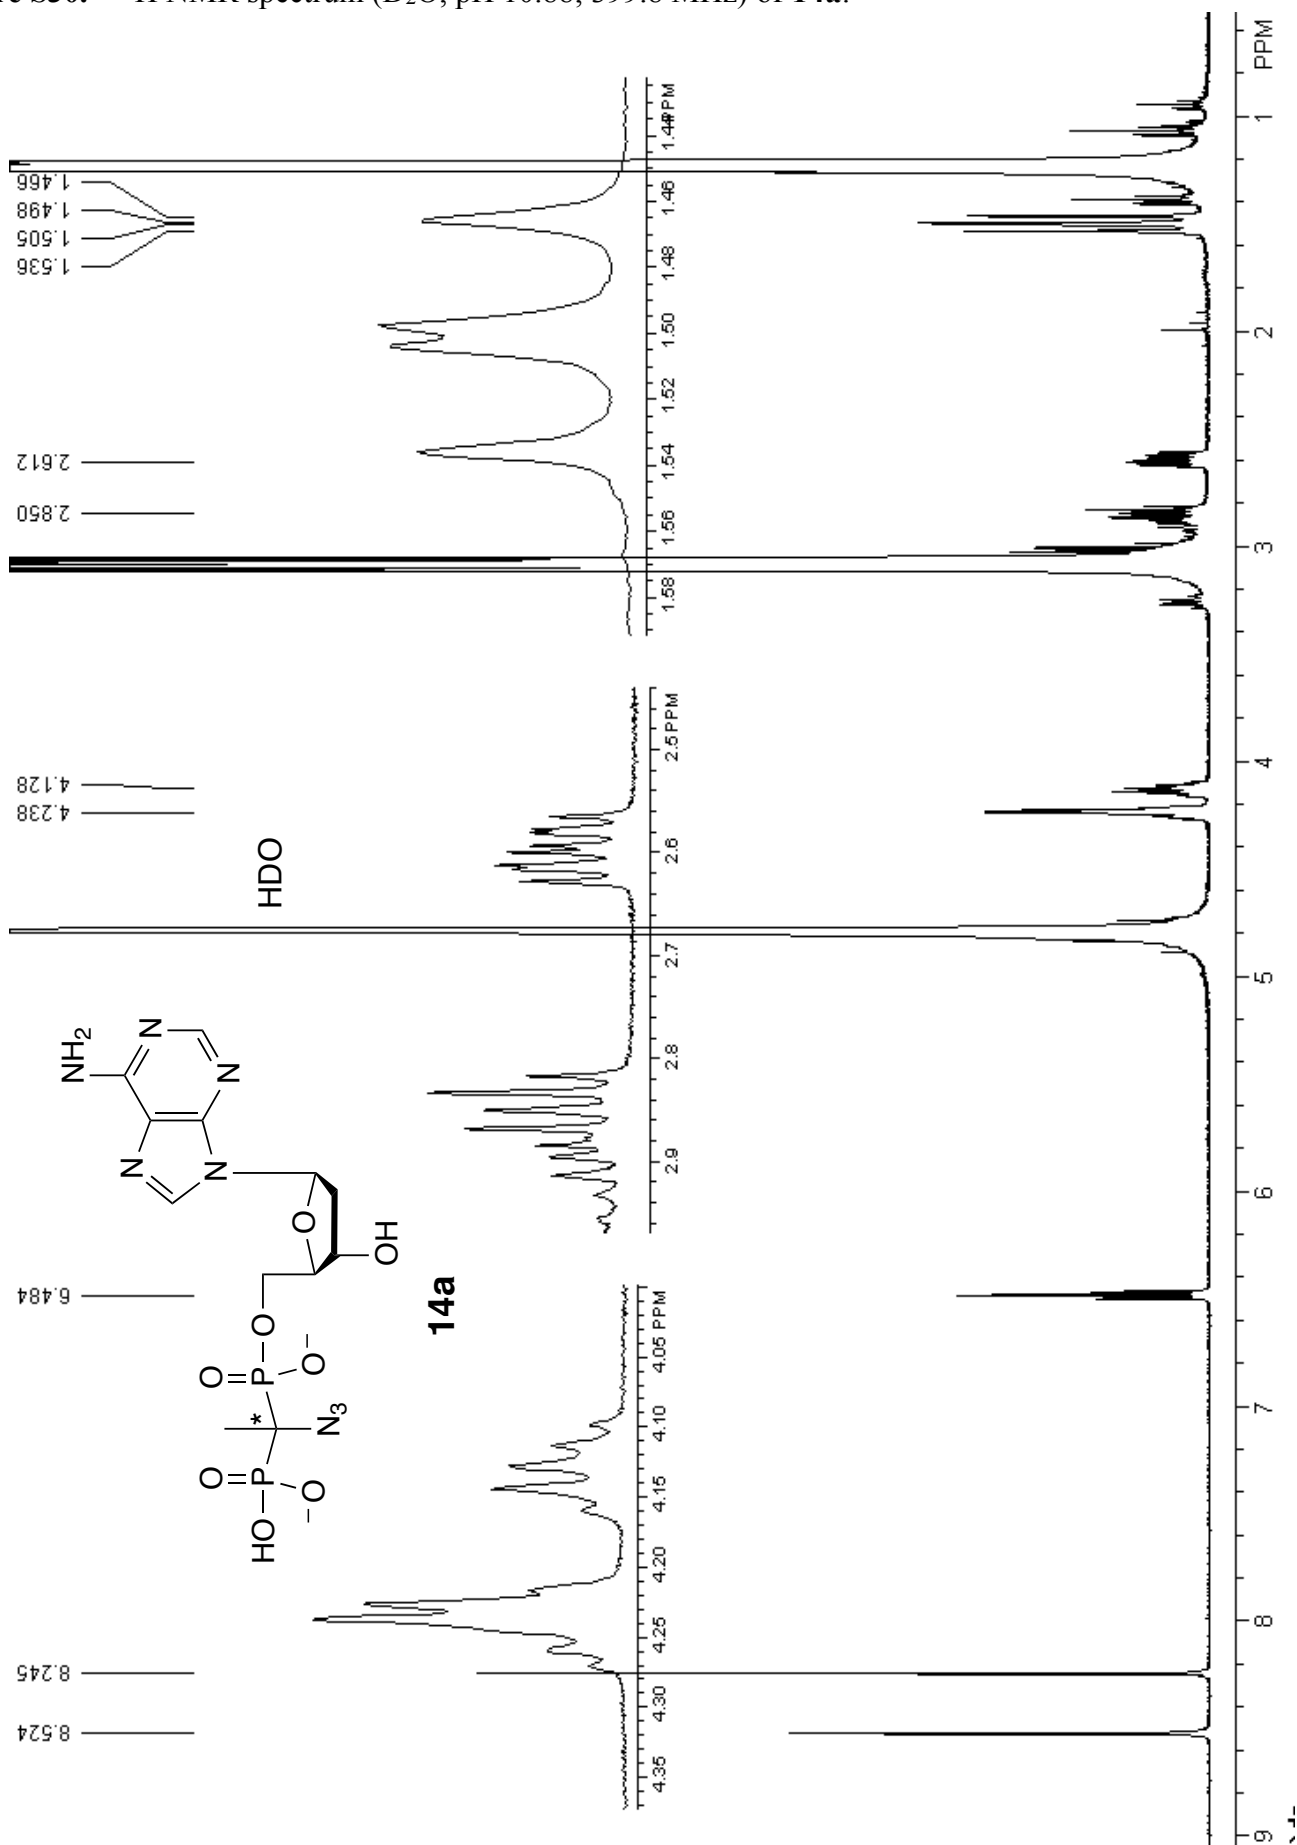

Figure S31.  $^1\text{H}$  NMR spectrum ( $\text{D}_2\text{O}$ , pH 10.88; 399.8 MHz) of **14b**.

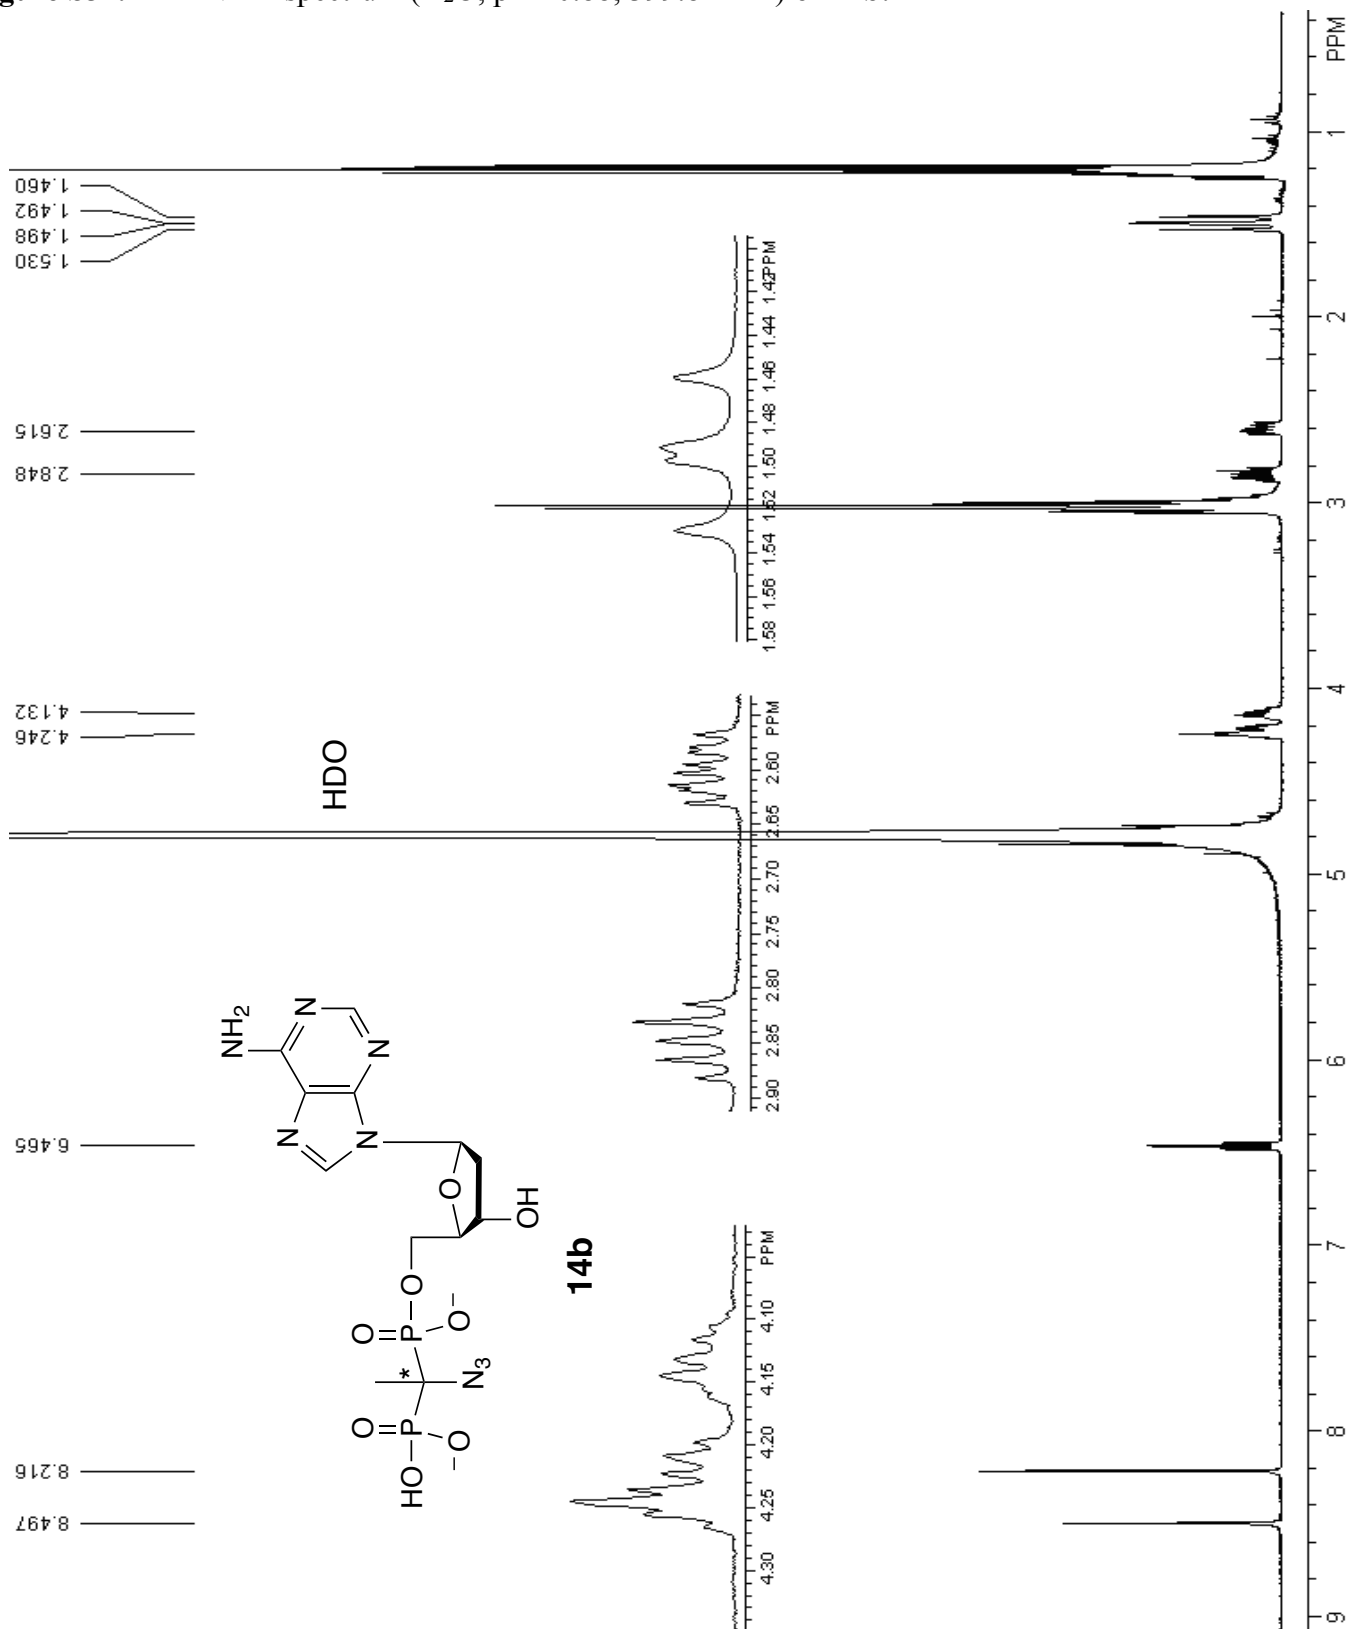

**Figure S32.**  $^1\text{H}$  NMR spectrum ( $\text{D}_2\text{O}$ , pH 10.88; 499.7 MHz) of **7a**.

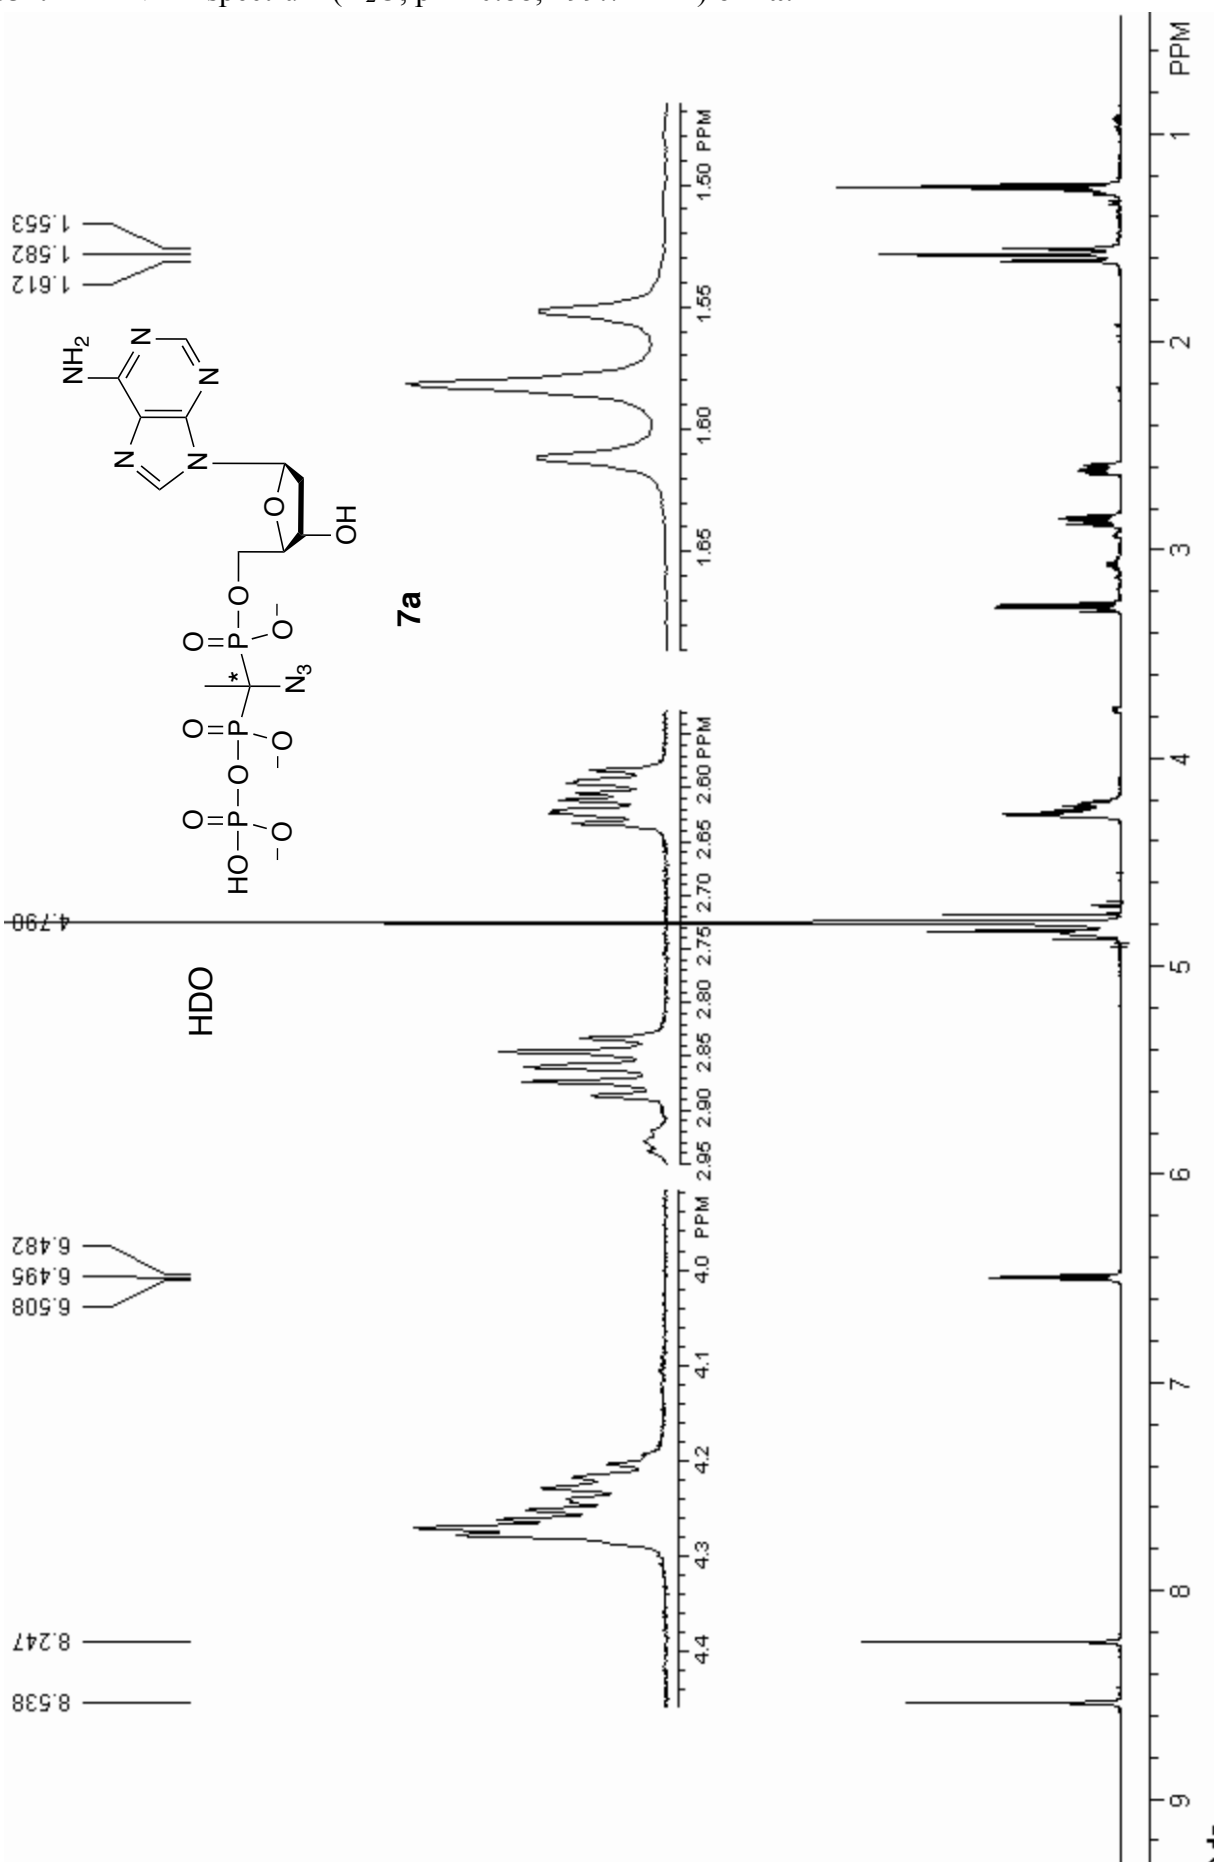

Figure S33.  $^{31}\text{P}$   $\{^1\text{H}\}$  NMR spectrum ( $\text{D}_2\text{O}$ , pH 10.88; 202.5 MHz) of **7a**.

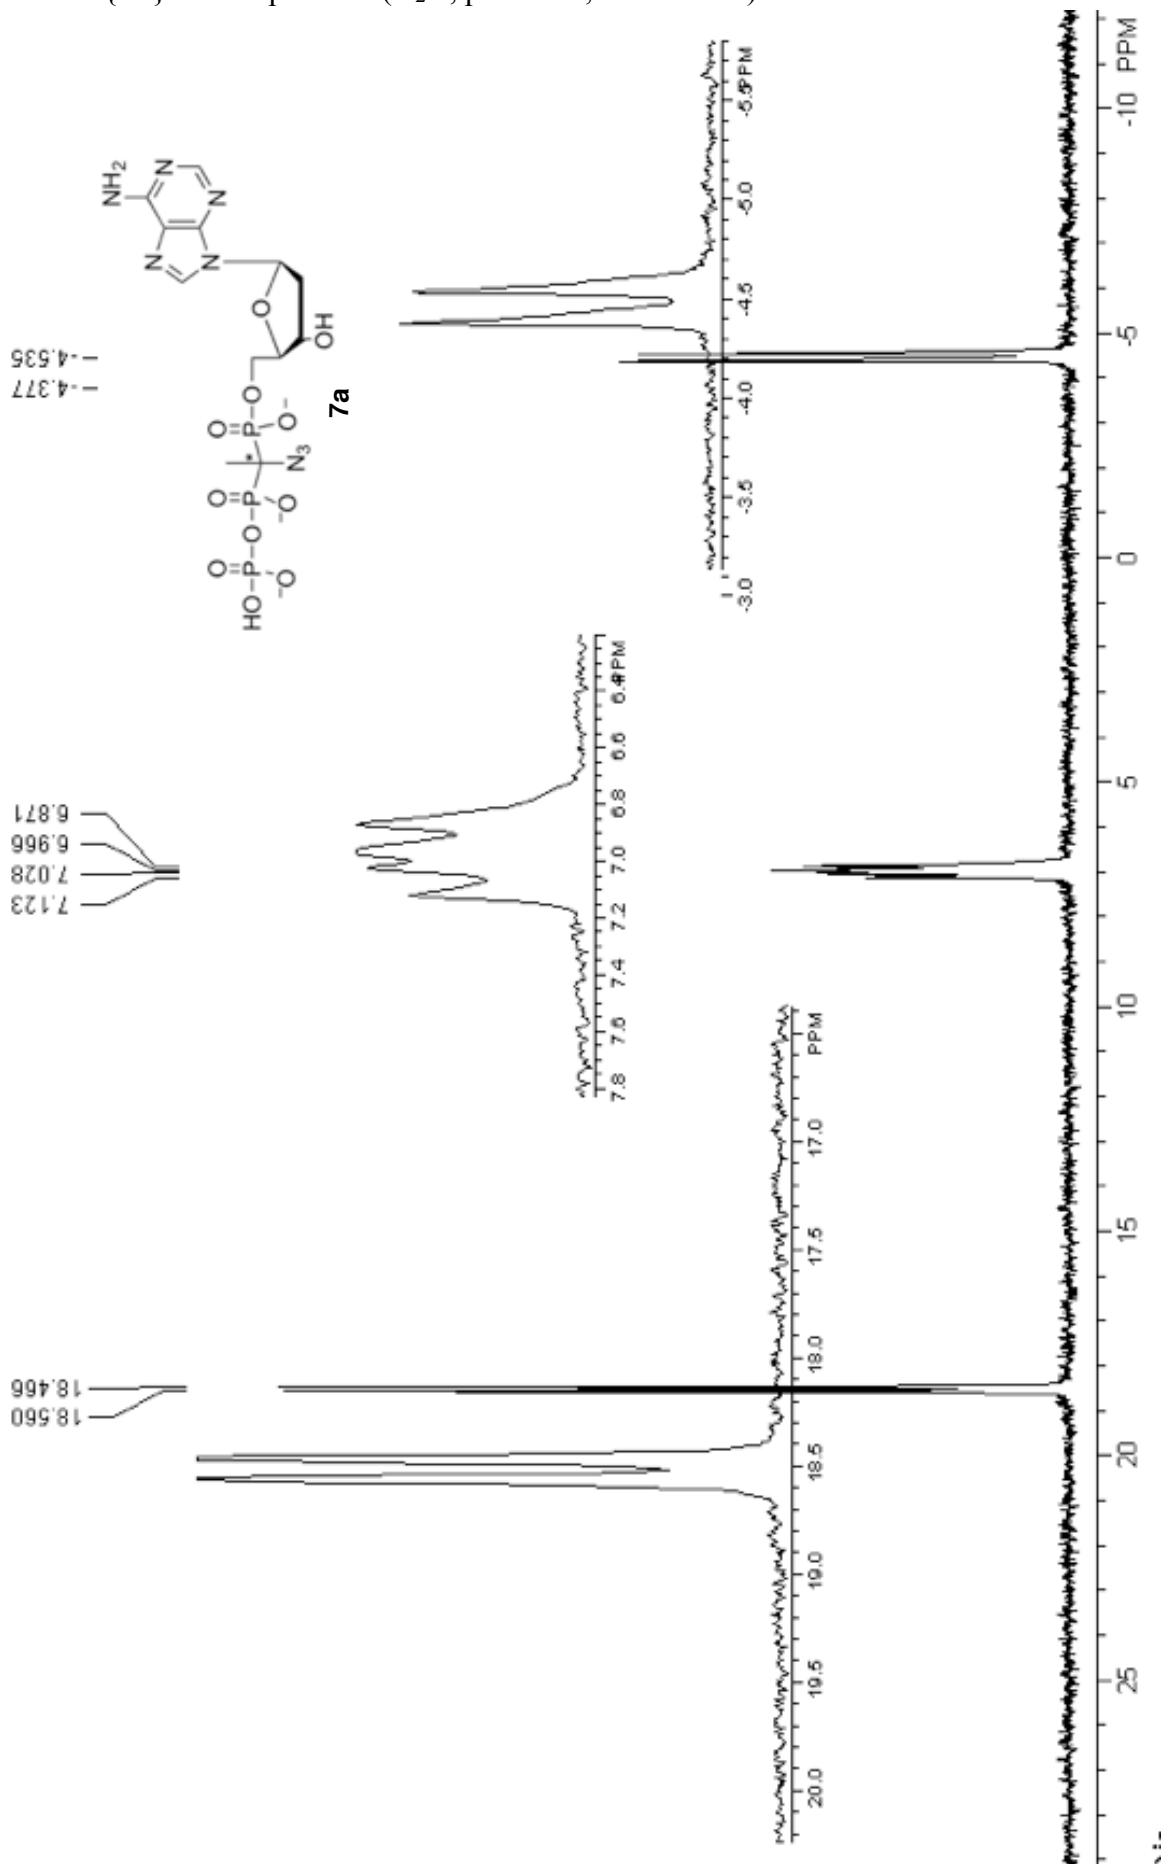

**Figure S34.**  $^1\text{H}$  NMR spectrum ( $\text{D}_2\text{O}$ , pH 10.88; 499.7 MHz) of **7b**.

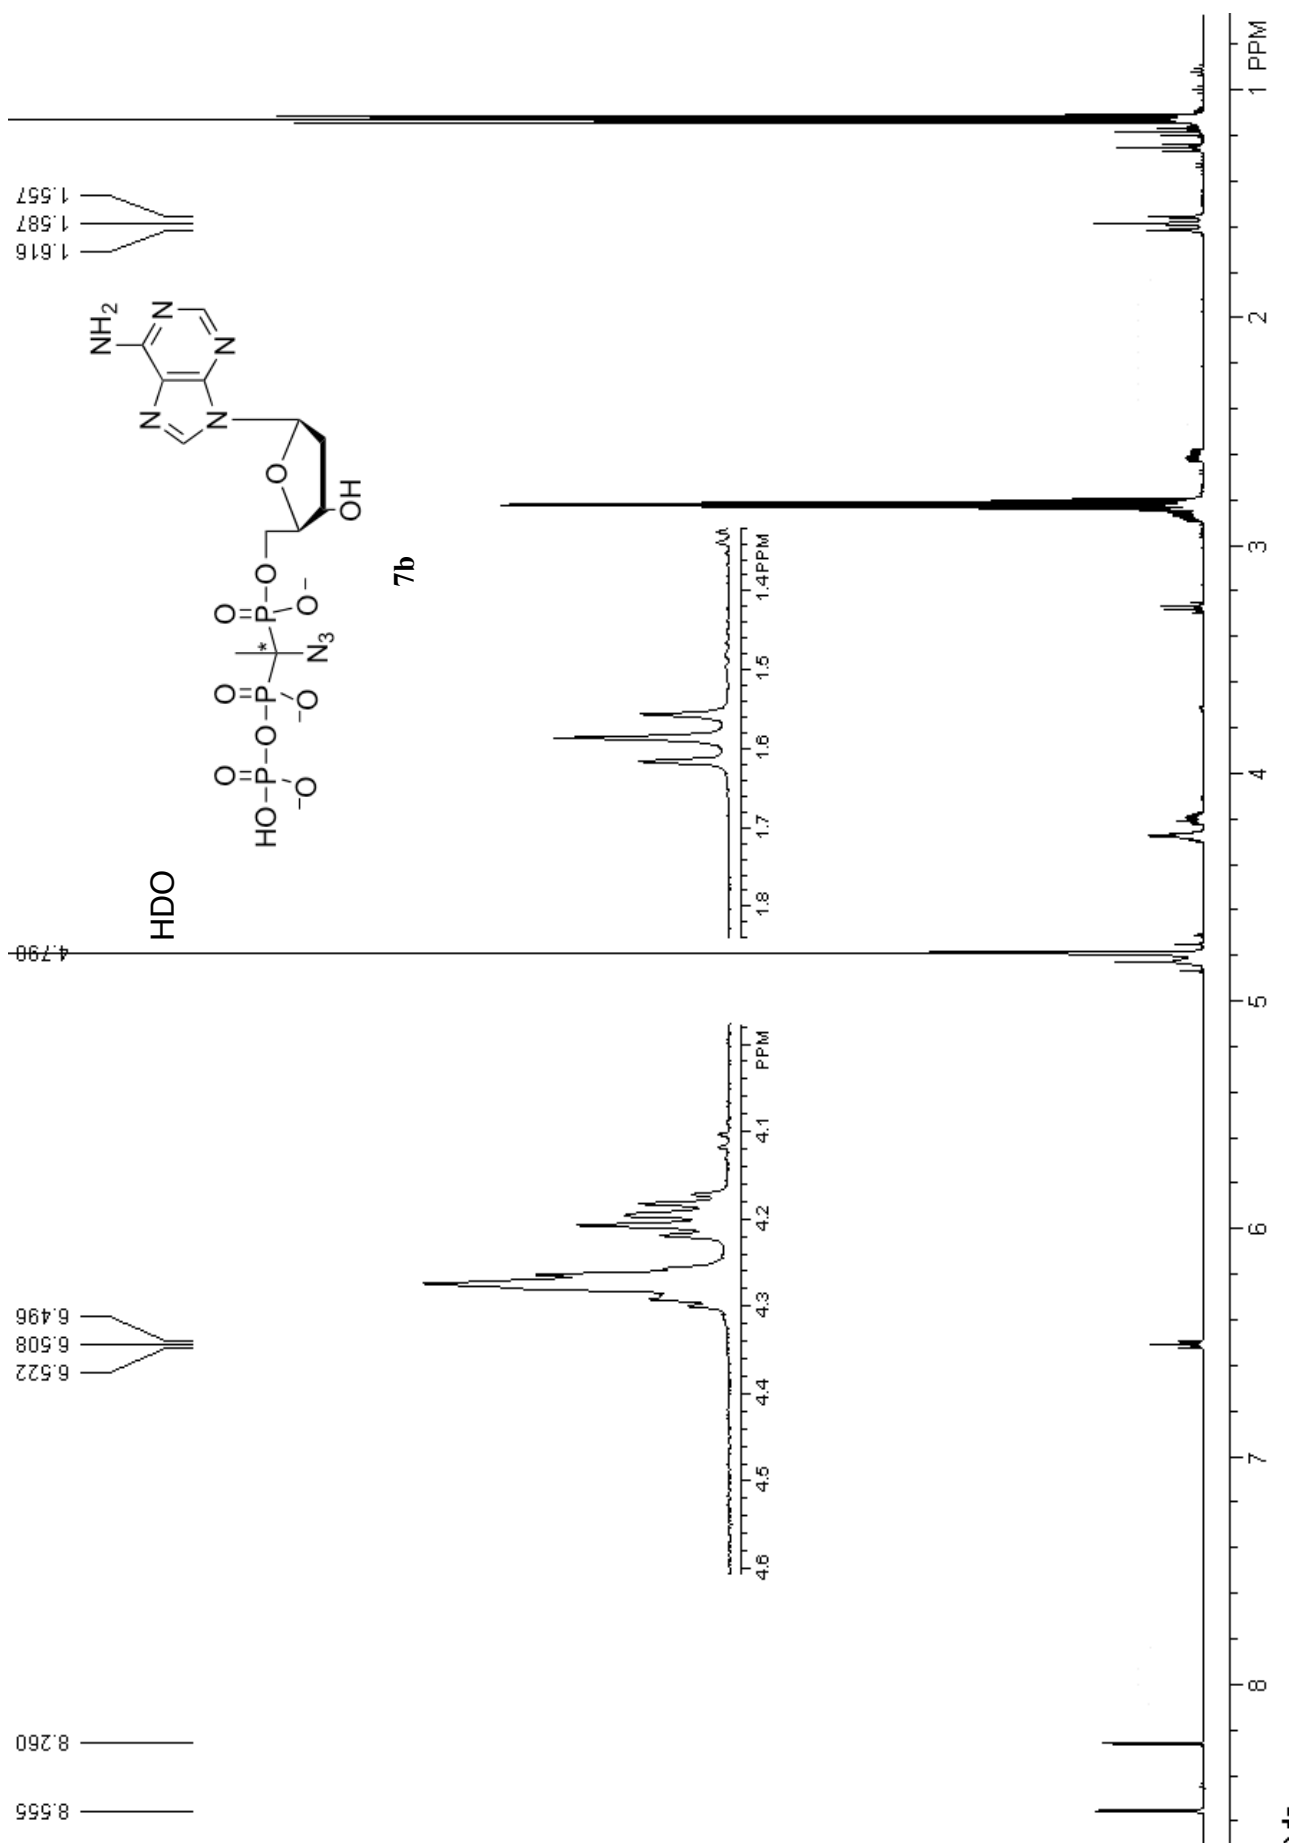

Figure S35.  $^{31}\text{P}$   $\{^1\text{H}\}$  NMR spectrum ( $\text{D}_2\text{O}$ , pH 10.88; 202.3 MHz) of **7b**.

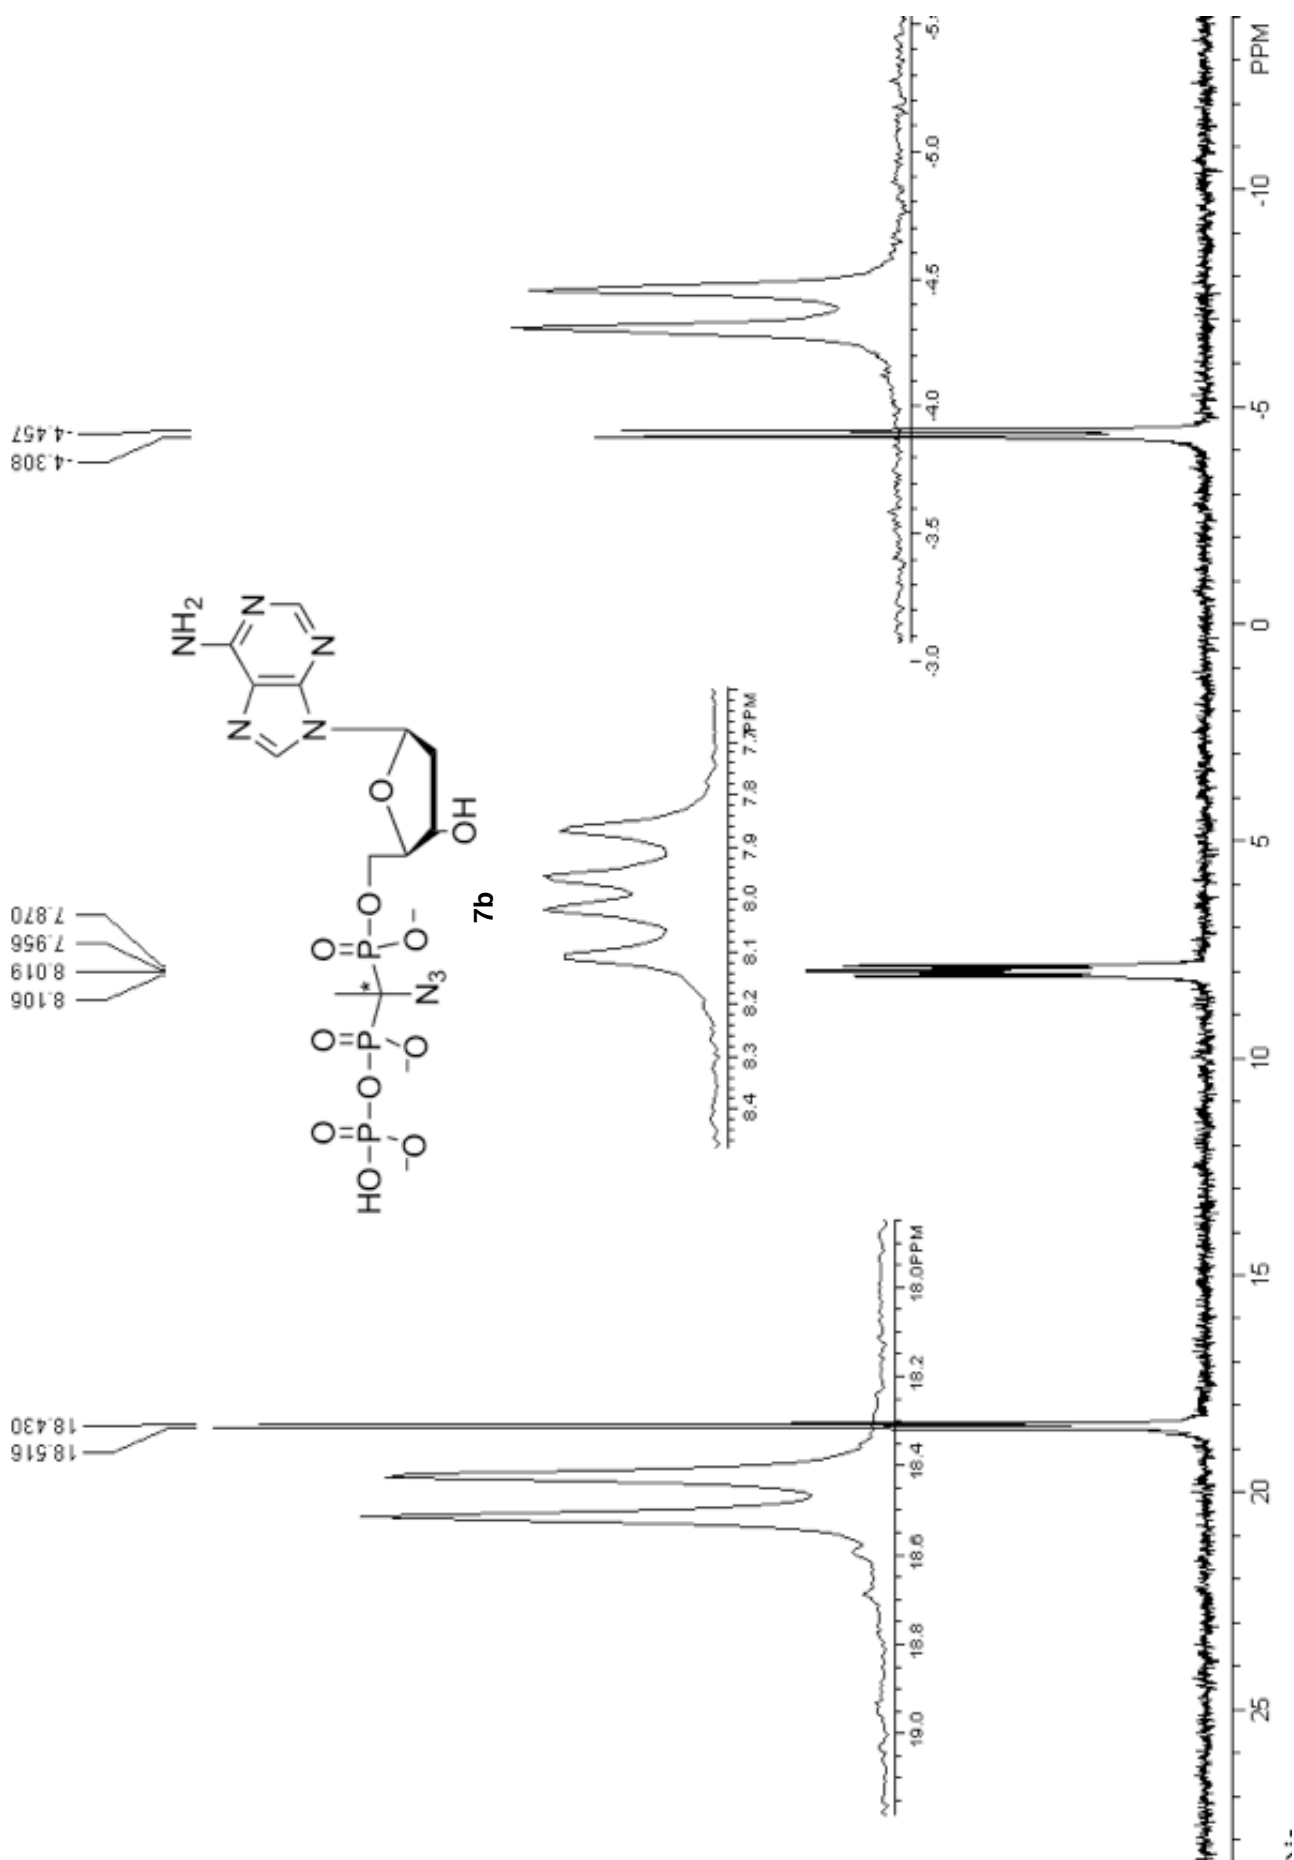

**Figure S36.** UV/VIS spectrum of **7a** in H<sub>2</sub>O, pH 8.  
Est. conc. ~0.05mM (E=15300).<sup>2</sup>

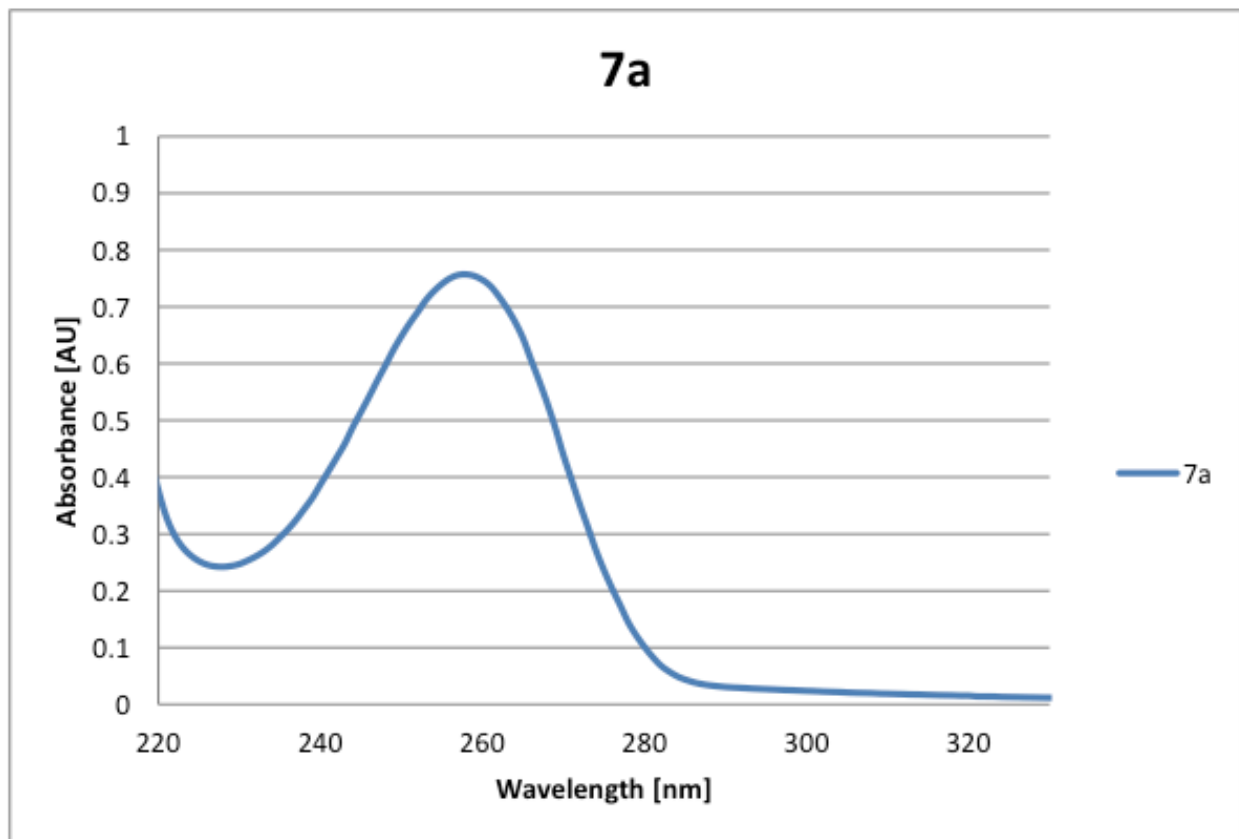

**Figure S37.** UV/VIS spectrum of **7b** in H<sub>2</sub>O, pH 8.  
Est. conc. ~0.05 mM (E=15300).<sup>2</sup>

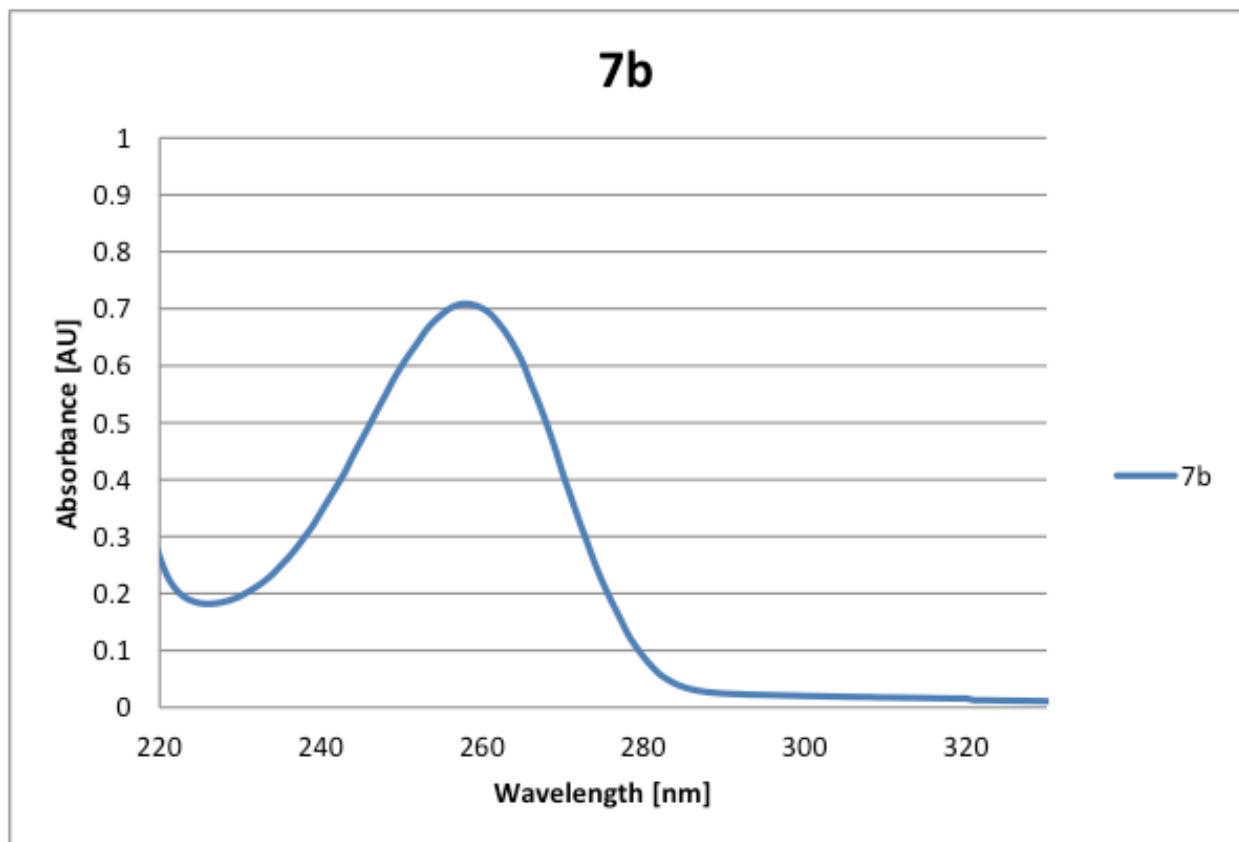

**Figure S38.** CD spectra of **7a** and **7b** (25° C, 0.05 mM) in H<sub>2</sub>O, pH 8.

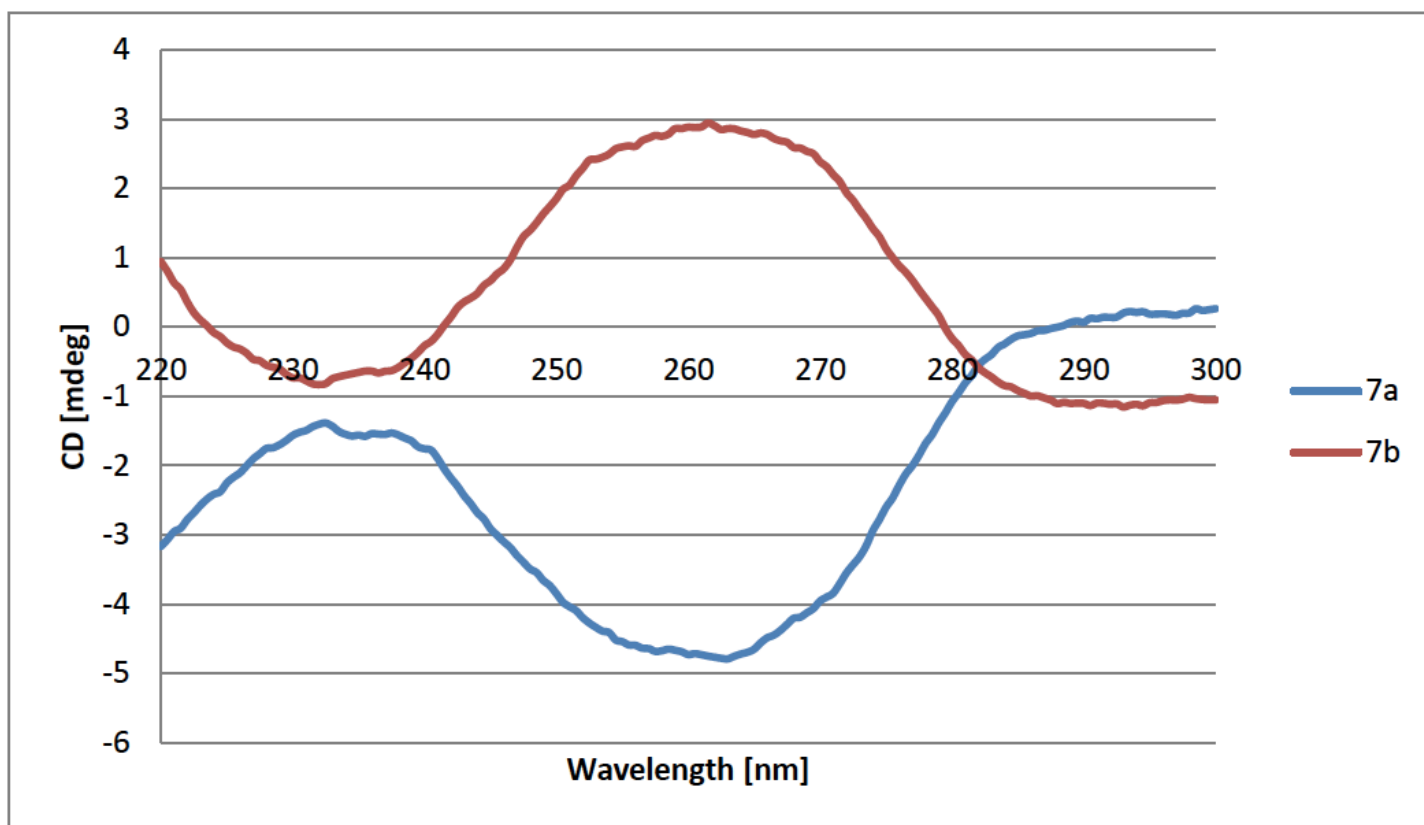



**Figure S39.**  $^{31}\text{P}$  spectrum ( $\text{D}_2\text{O}$ , pH 10.88; 242.8 MHz) of **15a/b**.

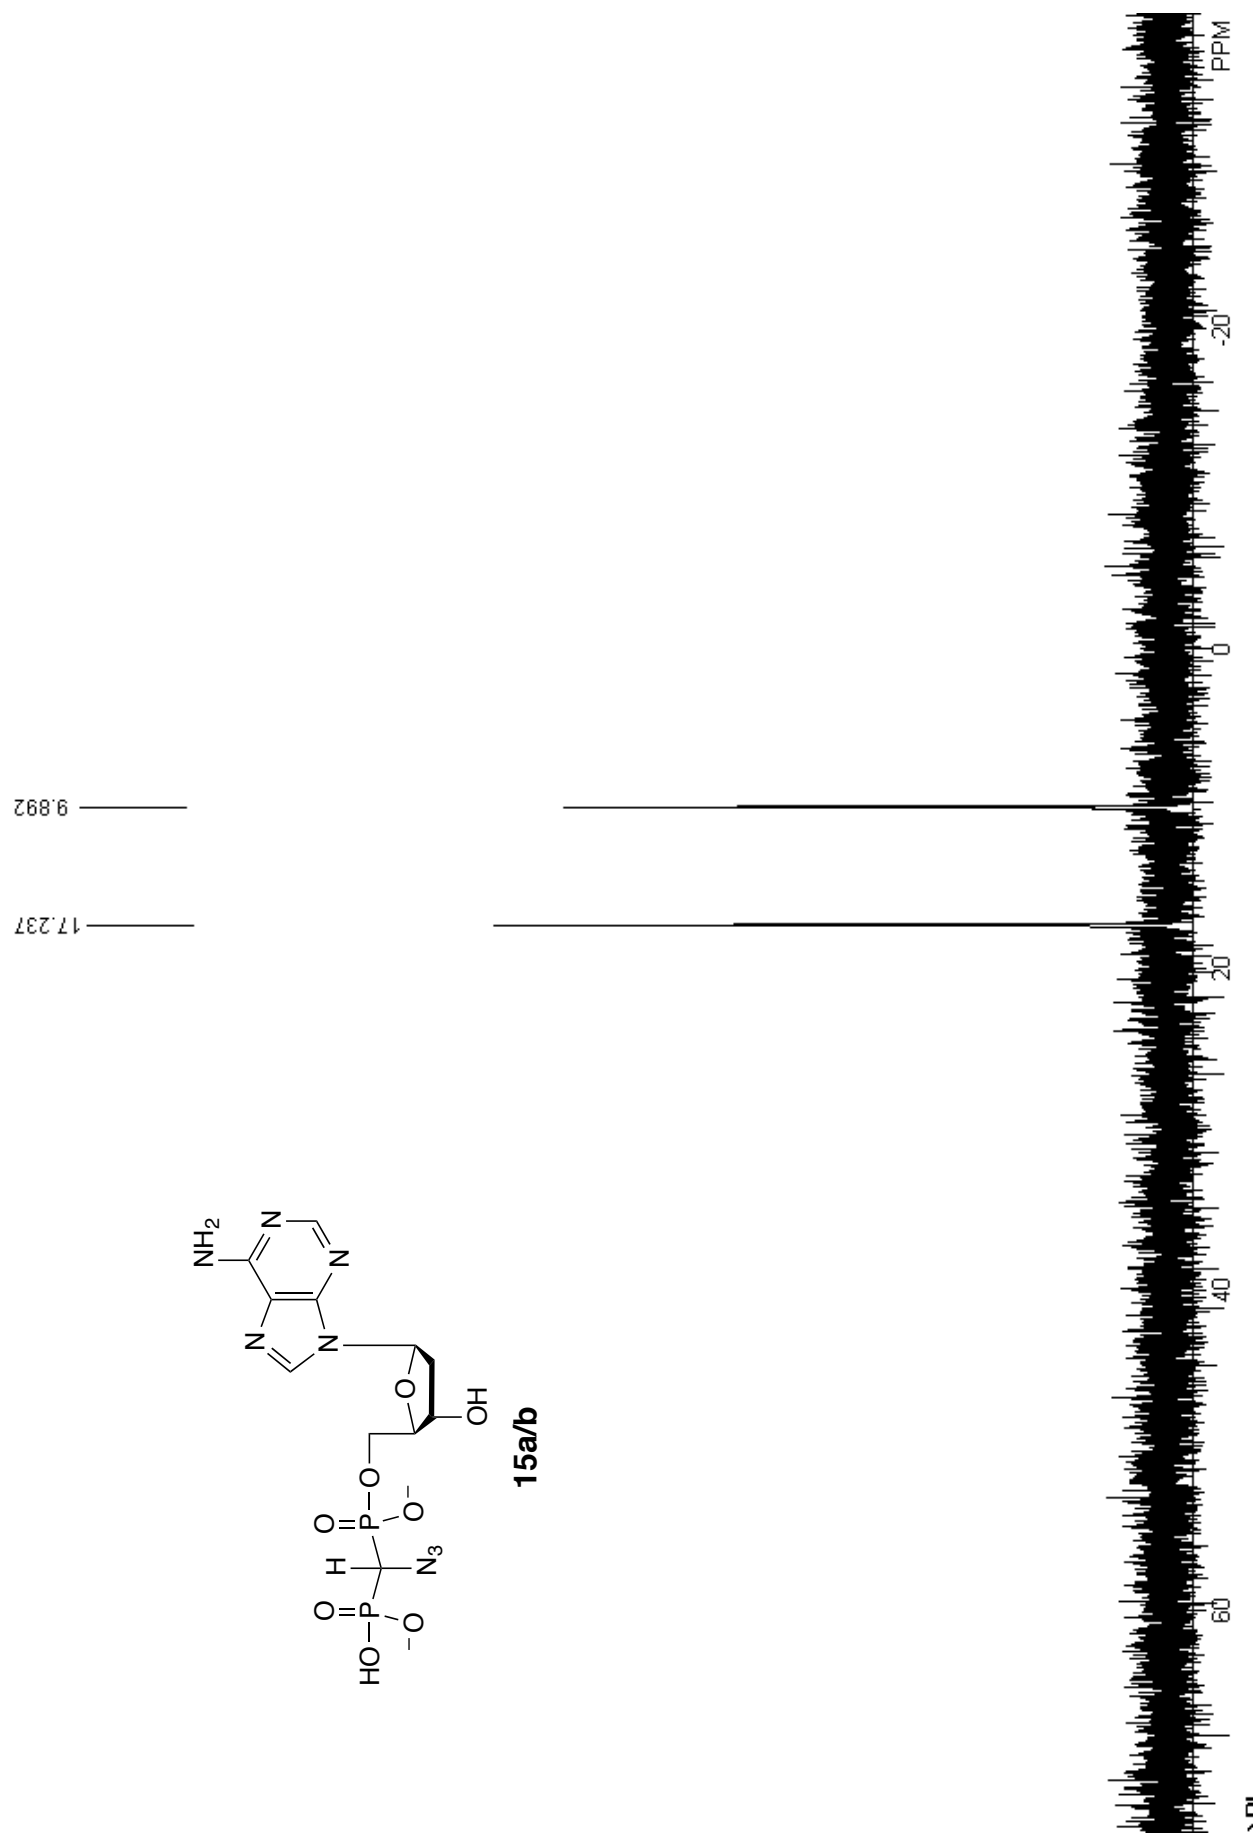

**Figure S40.**  $^1\text{H}$  NMR spectrum ( $\text{D}_2\text{O}$ , pH 10.88; 400.2 MHz) of **8a/b**.

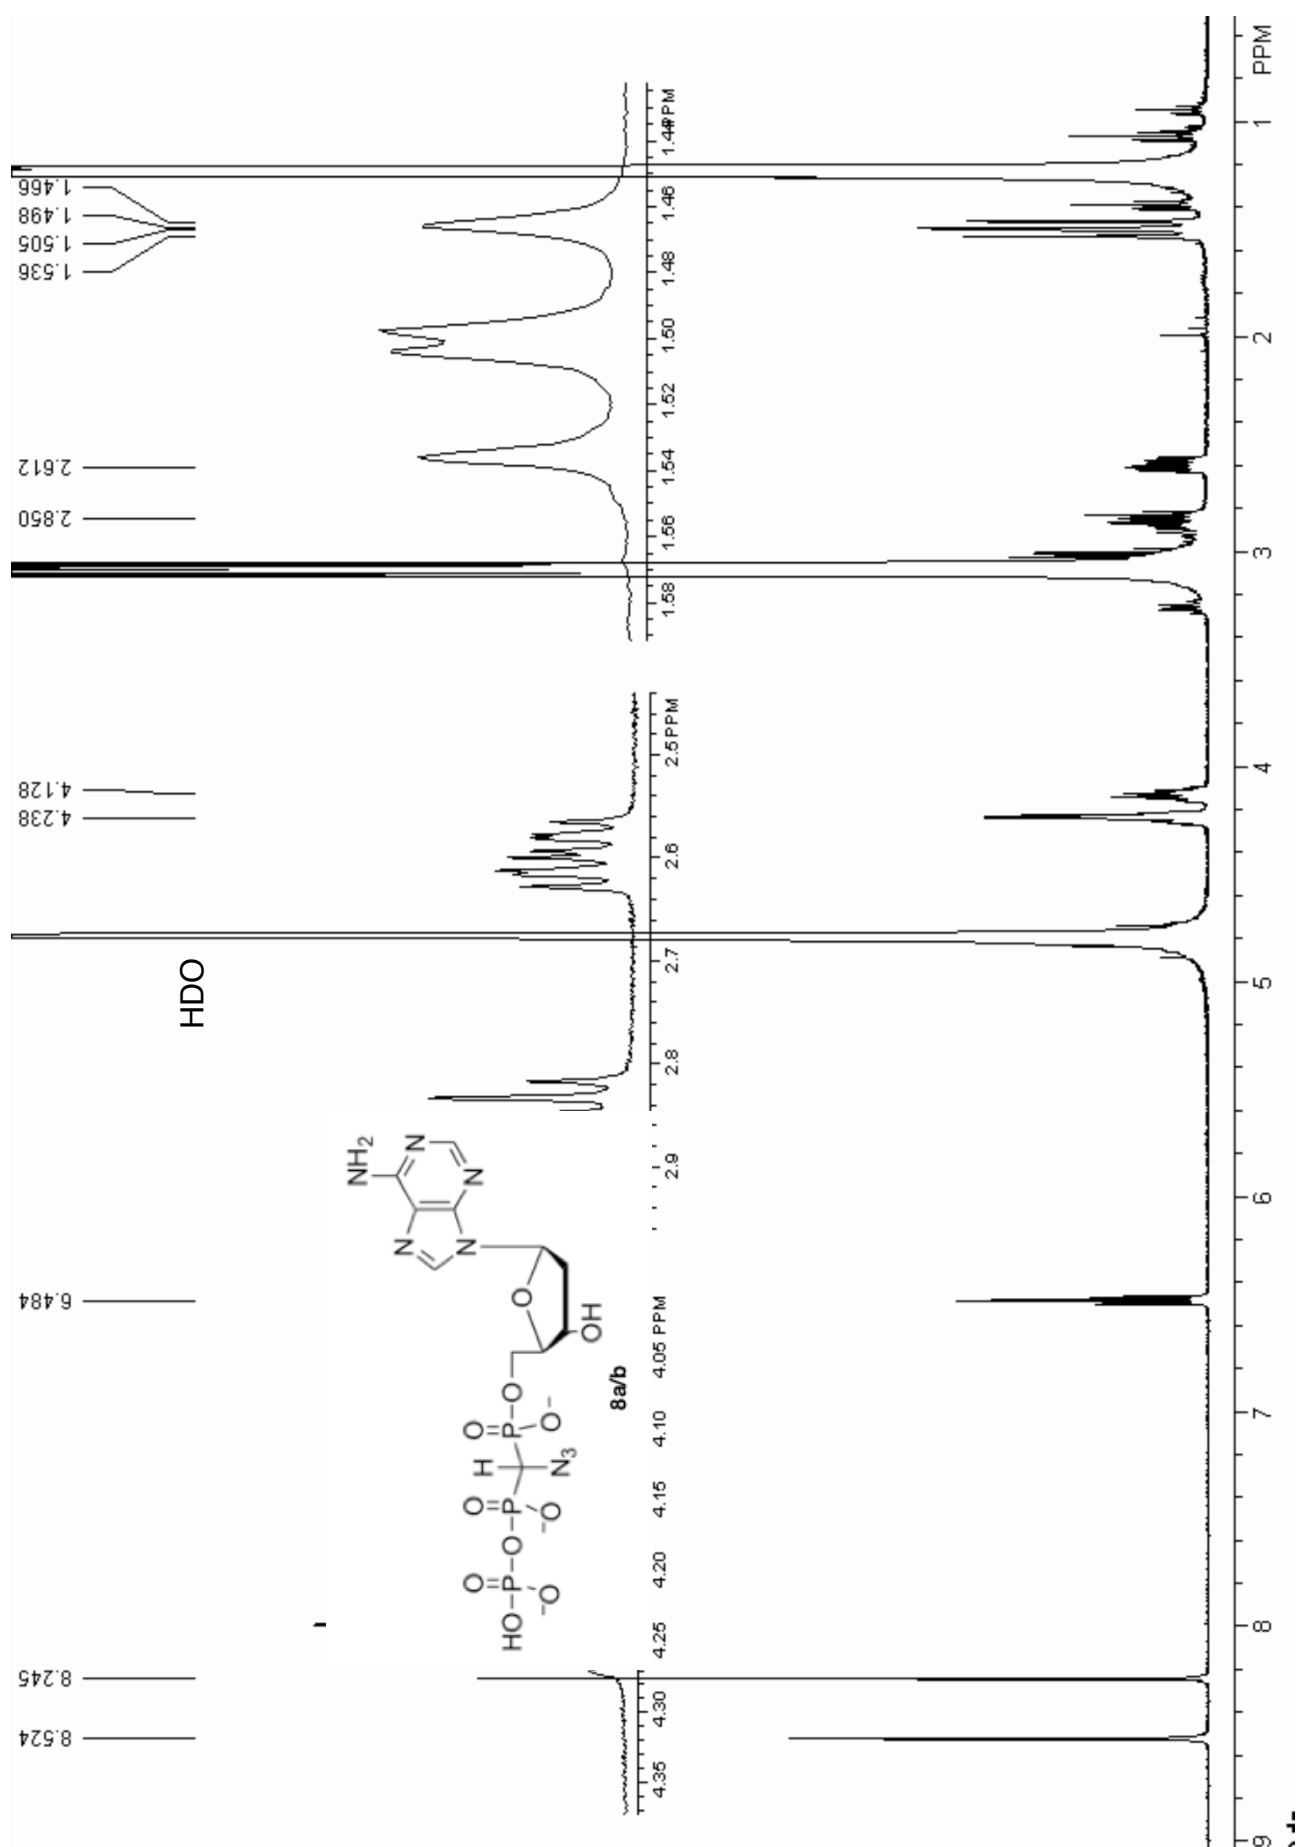

Figure S41.  $^{31}\text{P}$   $\{^1\text{H}\}$  NMR spectrum ( $\text{D}_2\text{O}$ , pH 10.88; 202.3 MHz) of **8a/b**.

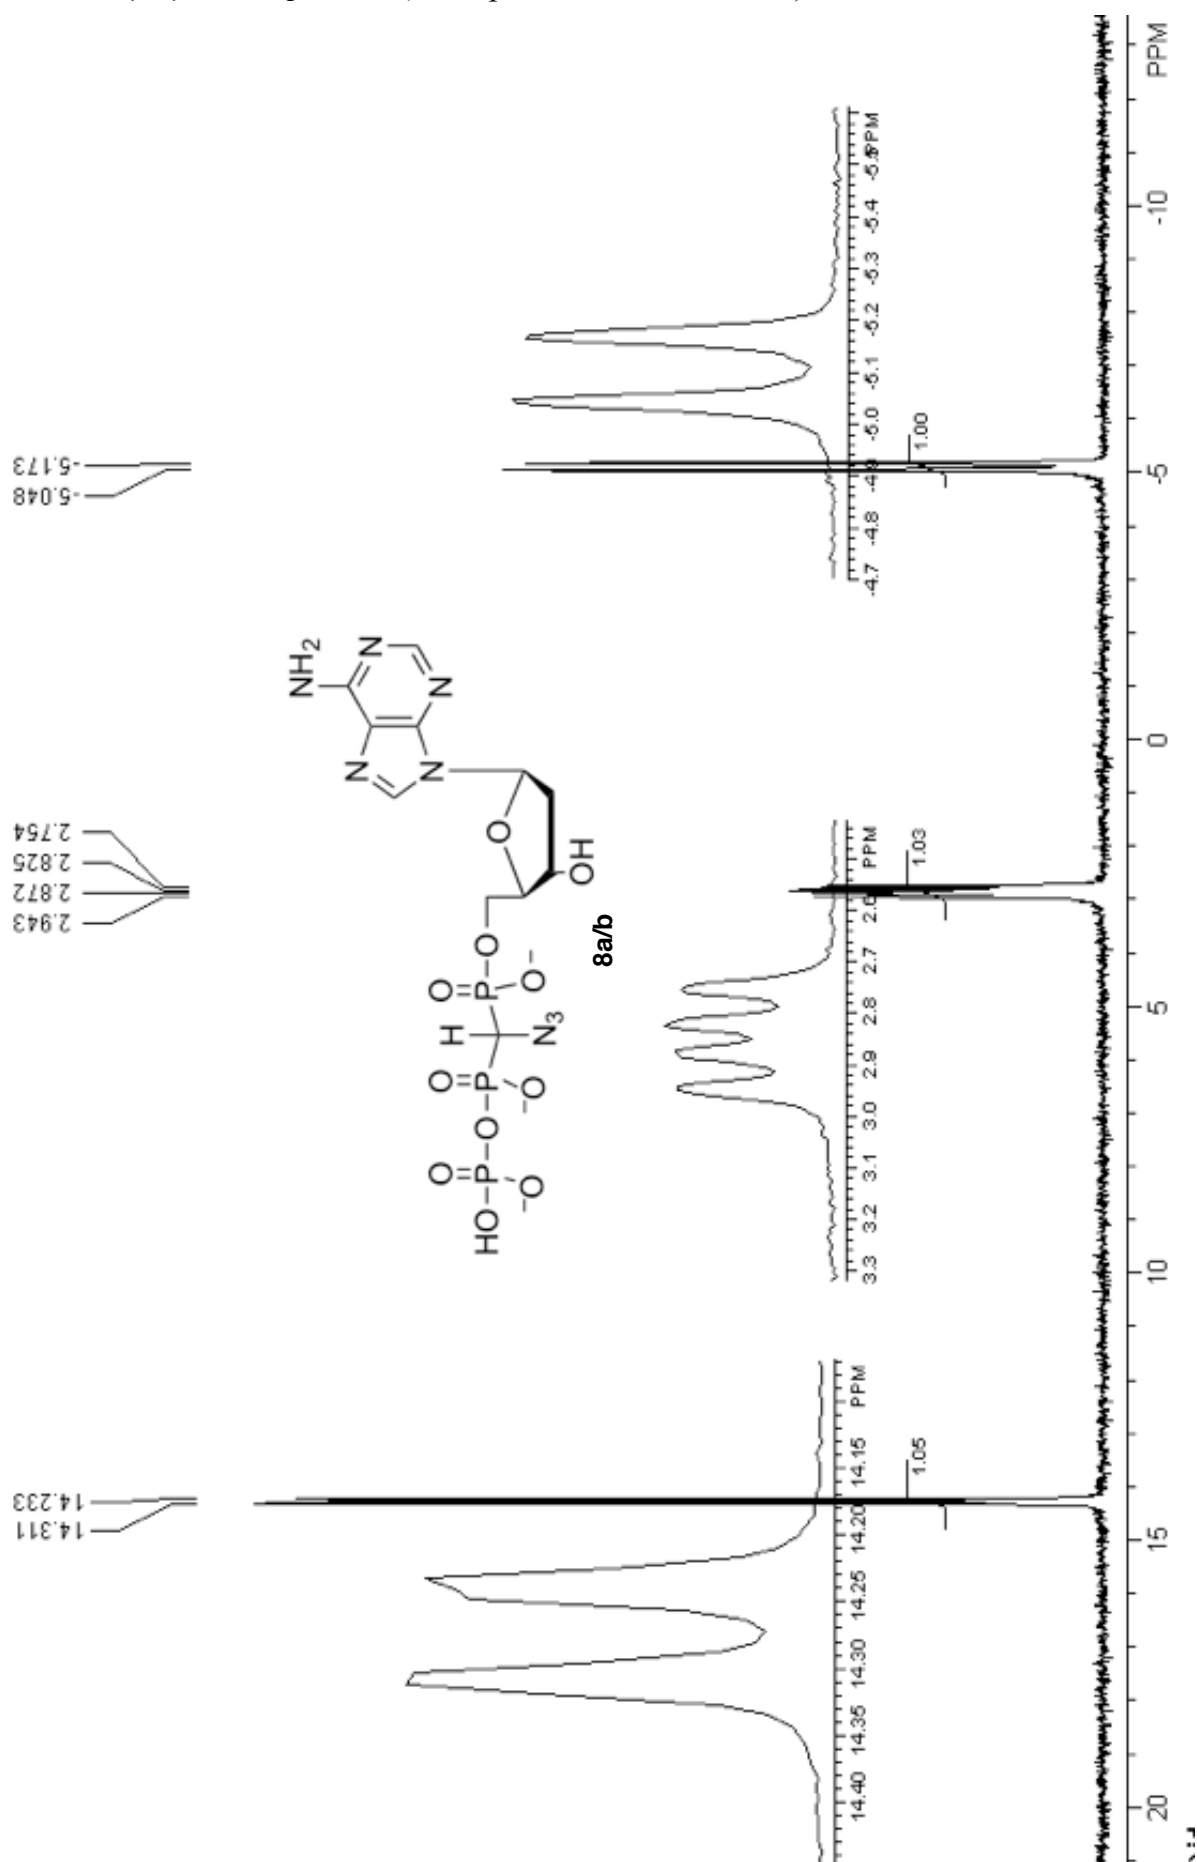

**Table S1.** Summary of HPLC (SAX) retention data for dNTP analogues.

| Compound    | RT (min) |
|-------------|----------|
| <b>5a/b</b> | 9.6      |
| <b>6a/b</b> | 10.3     |
| <b>7a</b>   | 9.5      |
| <b>7b</b>   | 9.5      |
| <b>8a/b</b> | 10.4     |

**Figure S42.** Representative analytical HPLC (SAX) analysis. Shown, **5a/b**, conditions described in Materials and Methods.

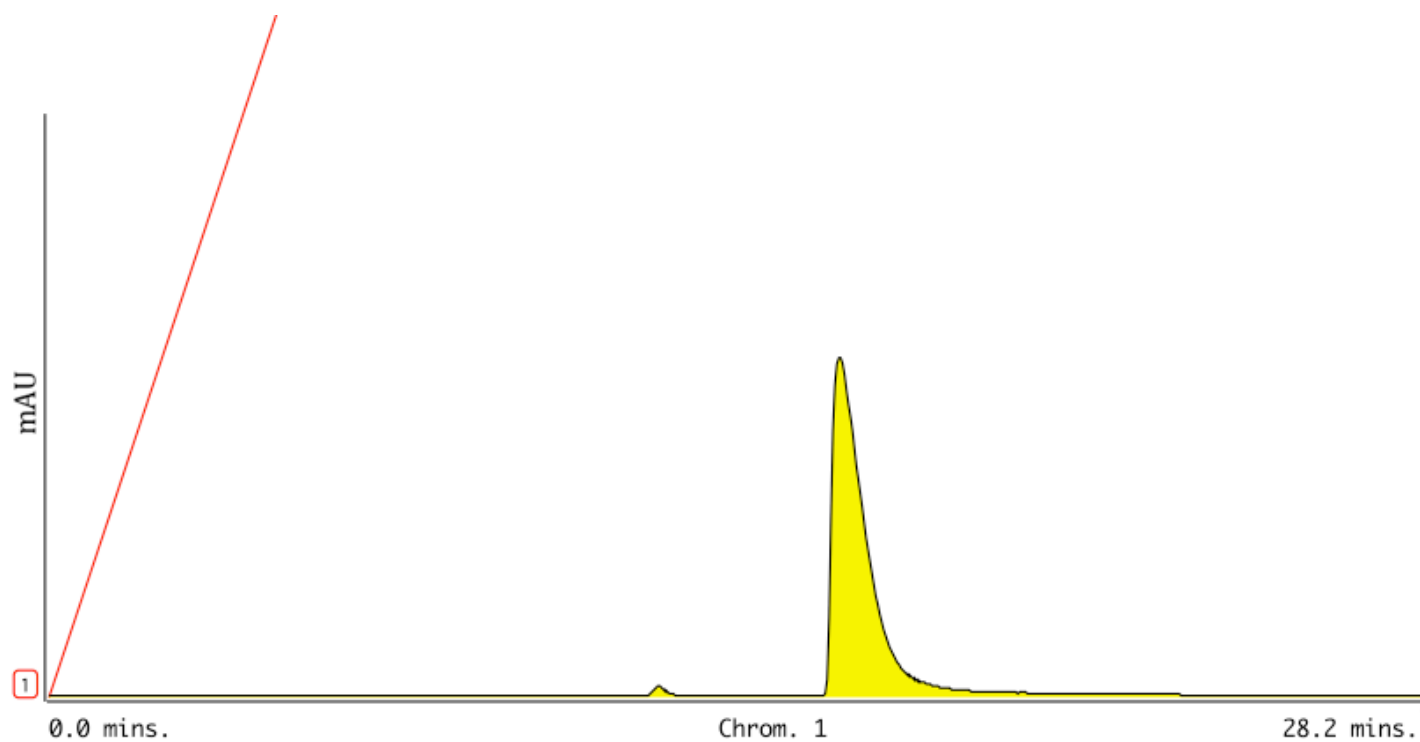

**Figure S43.**  $^{31}\text{P}\{^1\text{H}\}$  of *t*-BuOK-induced decomposition of **2**.

In cold THF ( $\text{CDCl}_3$ ; 202.5 MHz), to **12** (literature value:  $^{31}\text{P}$  -23.1)<sup>3</sup> and **13**.<sup>4</sup> Diisopropyl phosphate ( $\delta$  1.313) probably arises from hydrolysis of **12**. **13** assignment based on  $^{31}\text{P}$  NMR and MS (not shown).

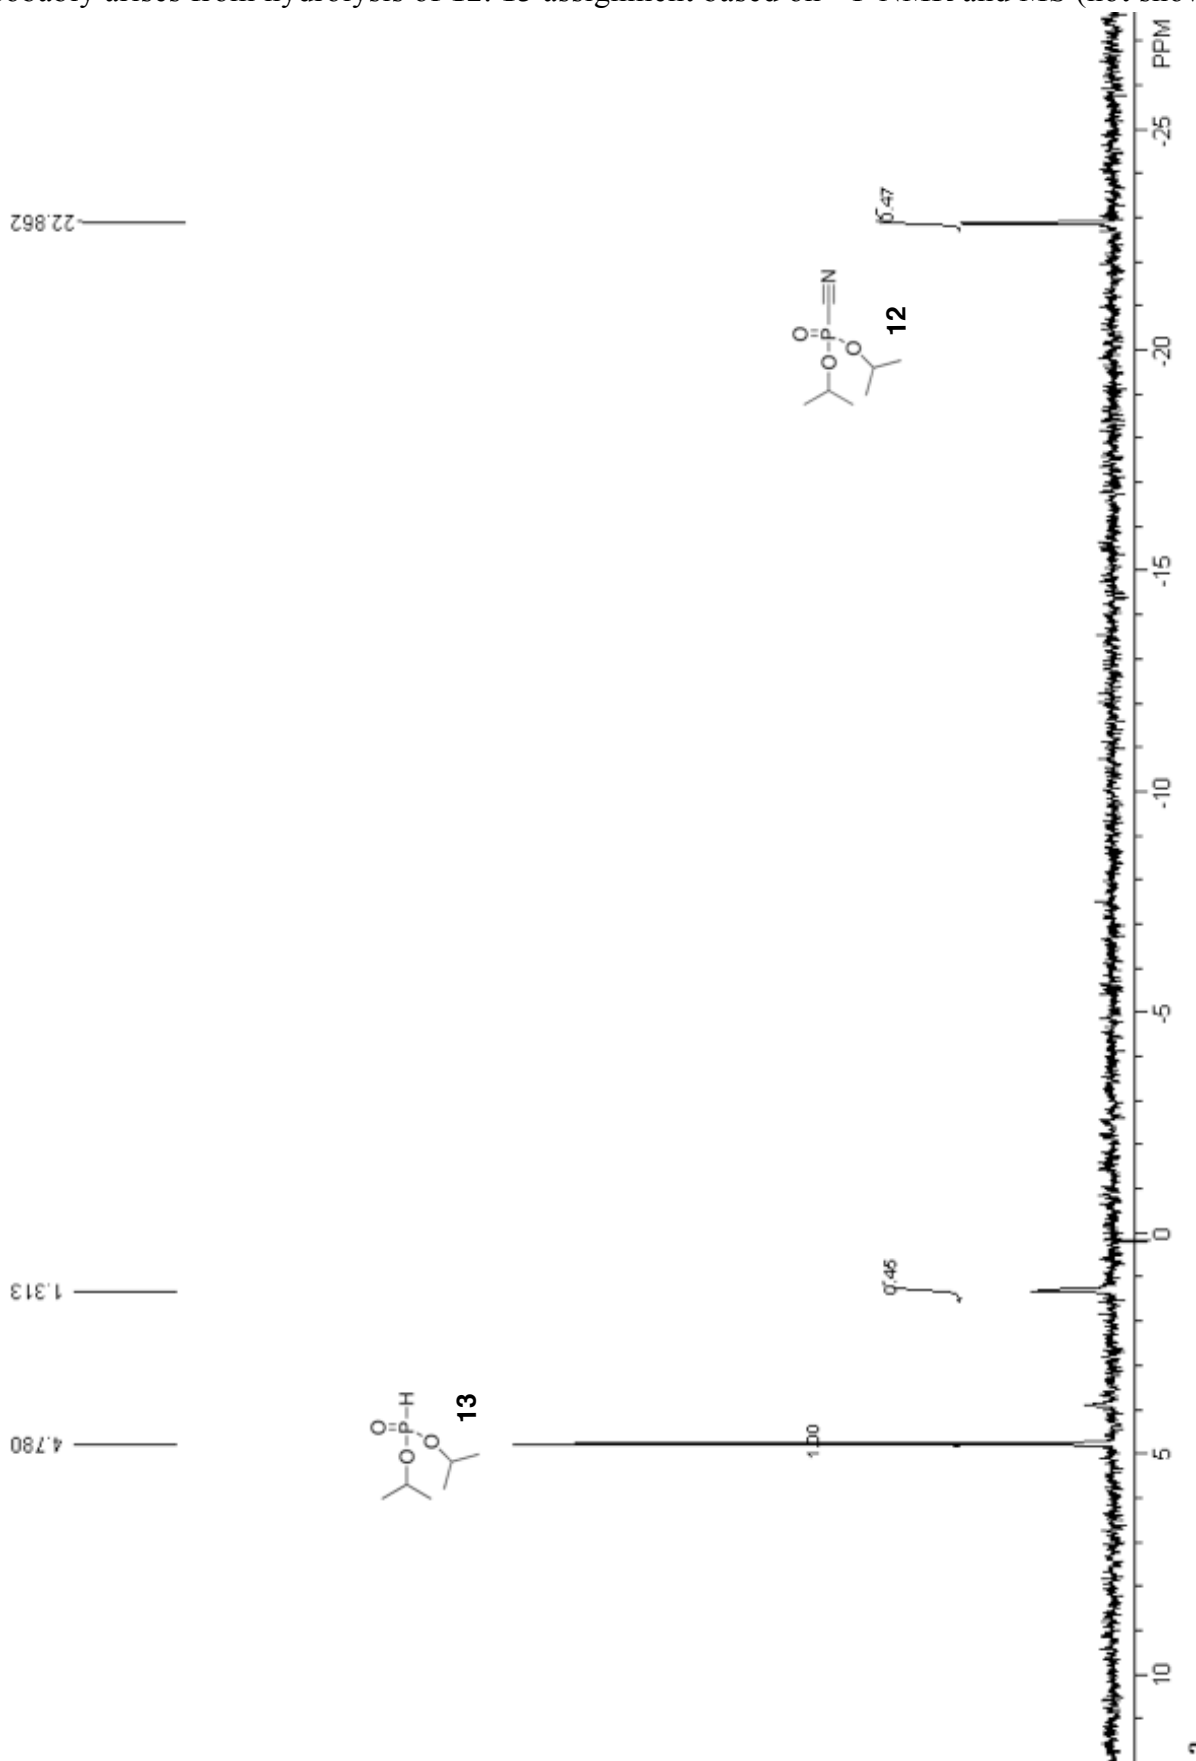

**Figure S44.**  $^{31}\text{P}$  NMR spectrum (DMF; 202.5 MHz) of reaction mixture obtained by procedure for synthesis of “azido” product ref. 5.

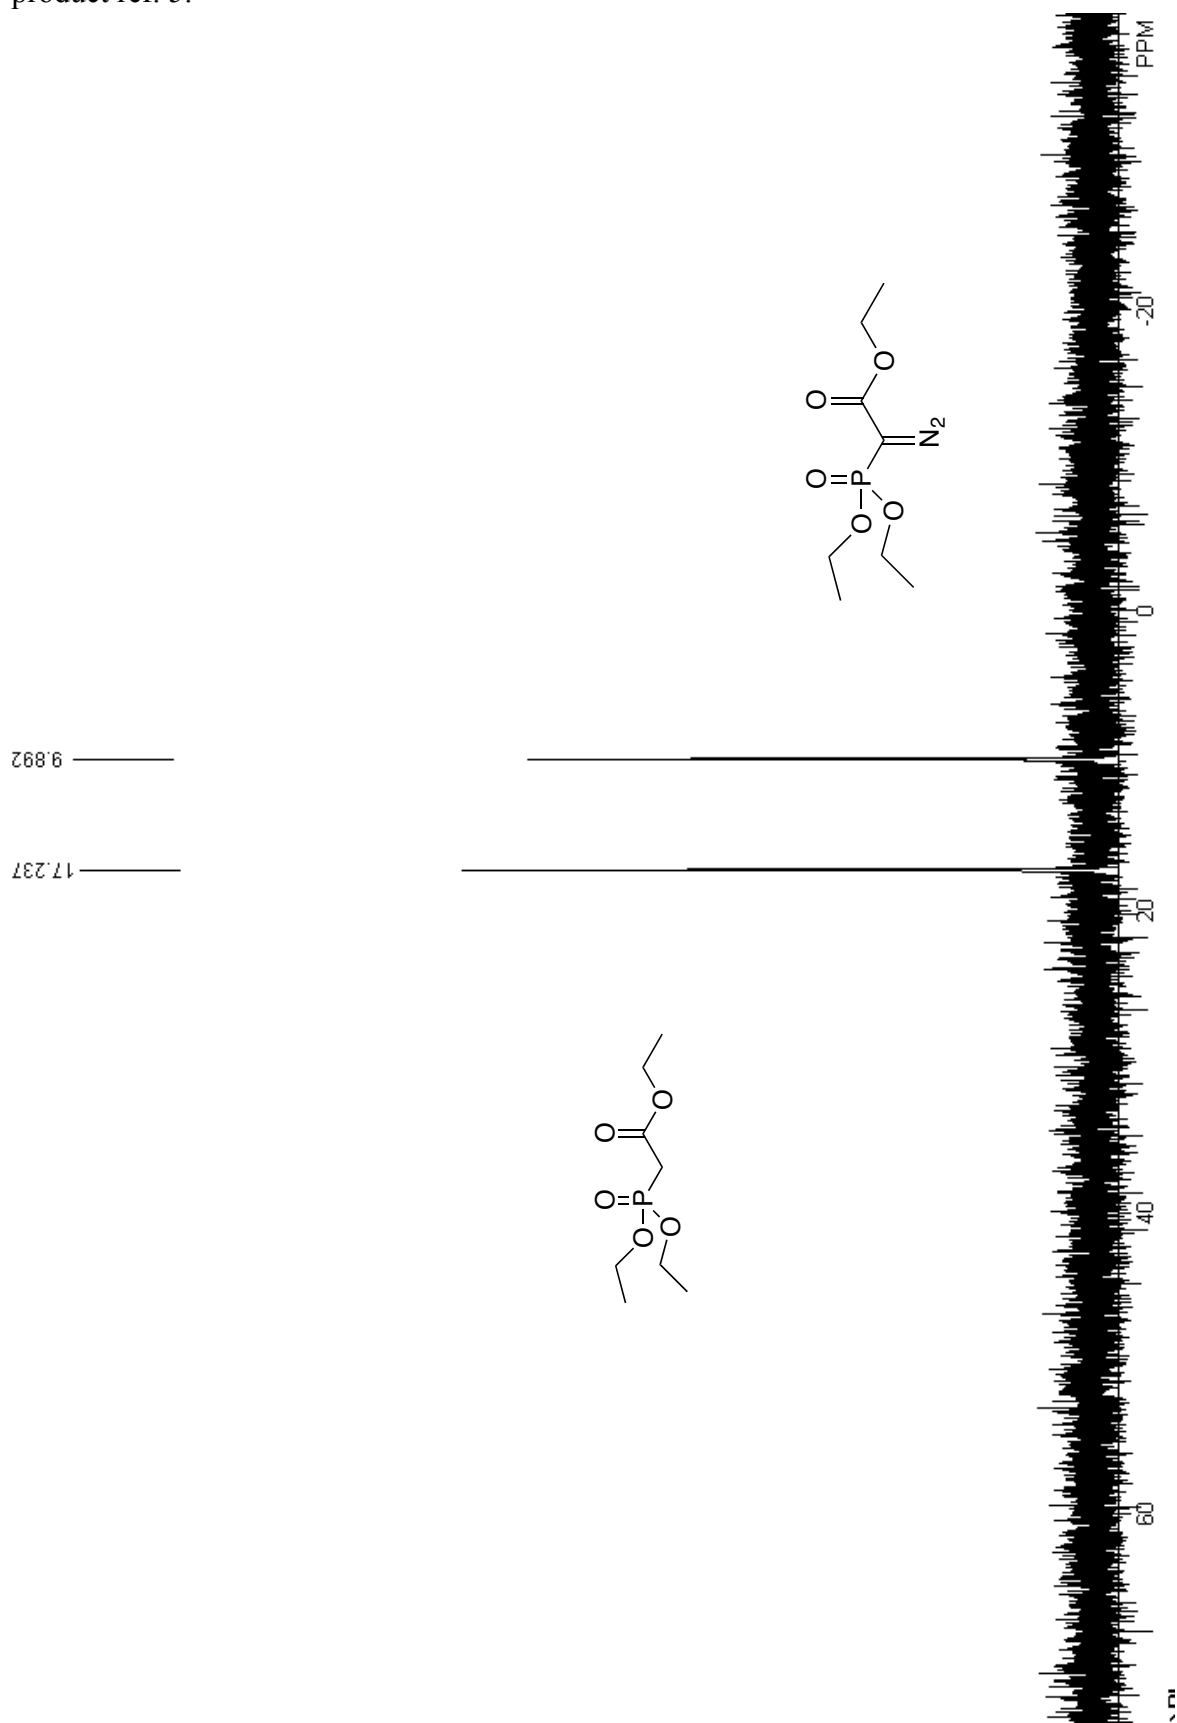

**Figure S45.**  $^{31}\text{P}$  NMR spectrum ( $\text{CDCl}_3$ ; 202.5 MHz) of triethyl diazophosphonoacetate obtained using procedure from ref. 5.

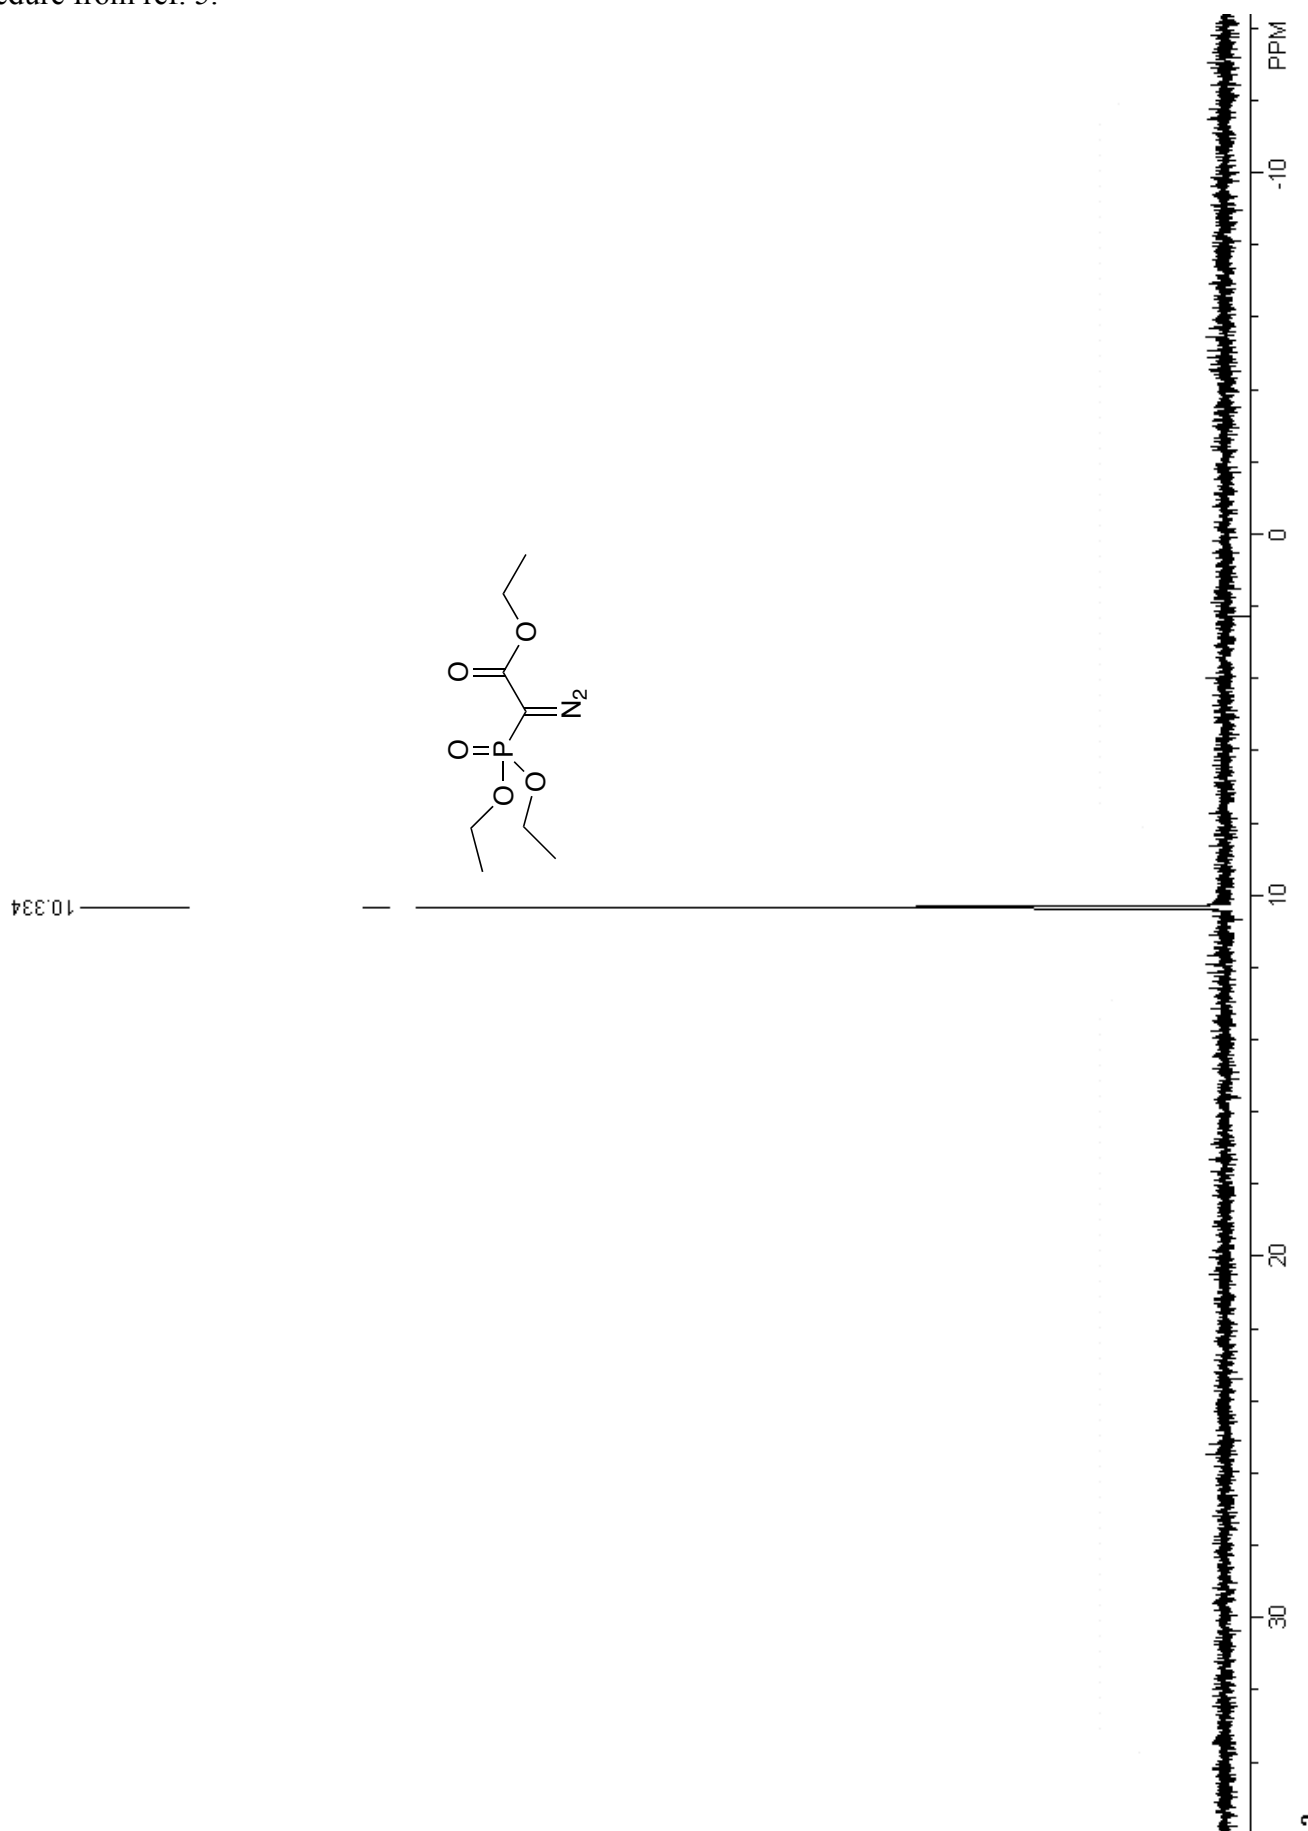

**Figure S46.**  $^1\text{H}$  NMR spectrum ( $\text{CDCl}_3$ ; 400.2 MHz) of triethyl diazophosphonoacetate obtained using procedure from ref. 5.

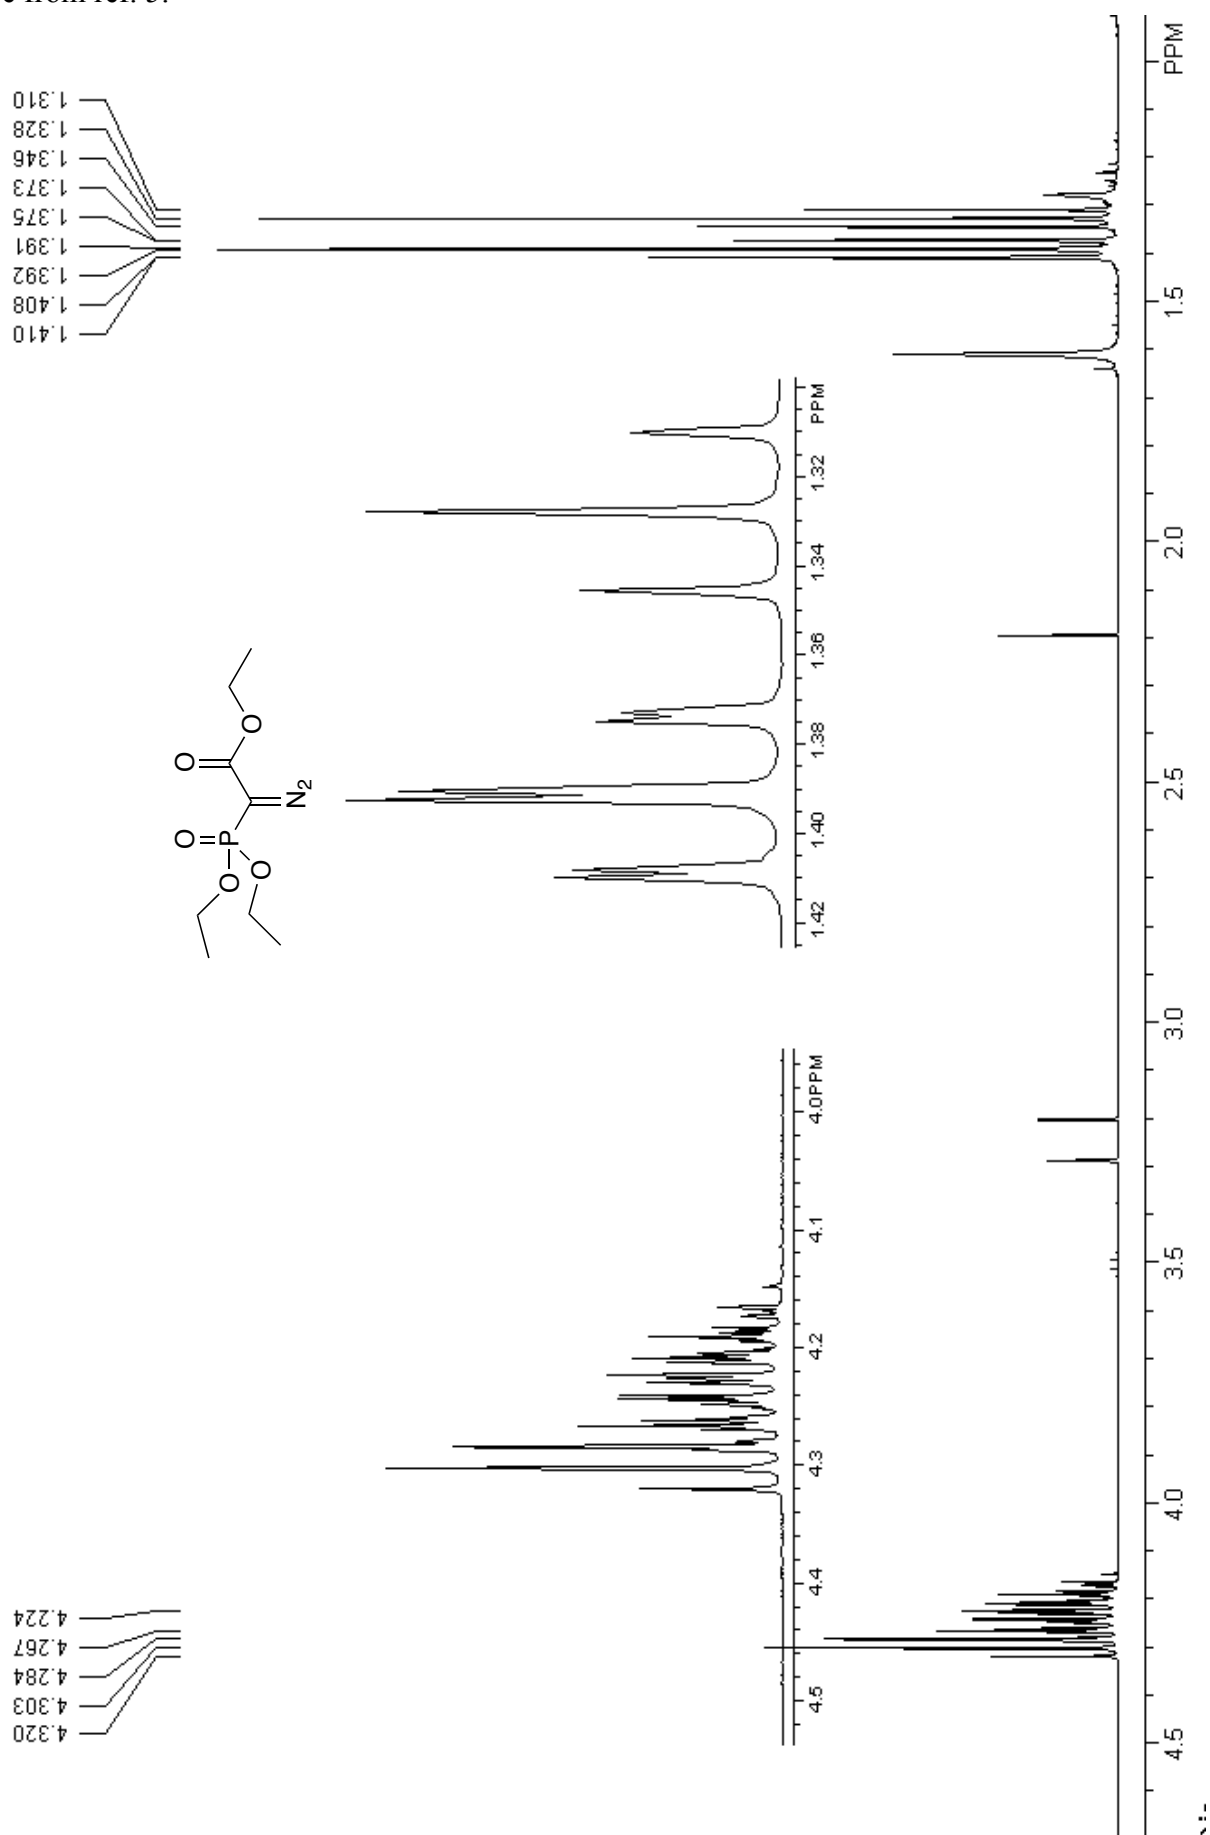



Figure S47. MS (ACPi) [M+1]<sup>+</sup> spectrum of reaction mixture obtained using procedure from ref. 5.

LCQ Instrument Control 23 Mar 2011 03:21 PM

S#: 6708 IT: 0.25 ST: 0.30 #A: 10

NL: 2.01e+009

X 2

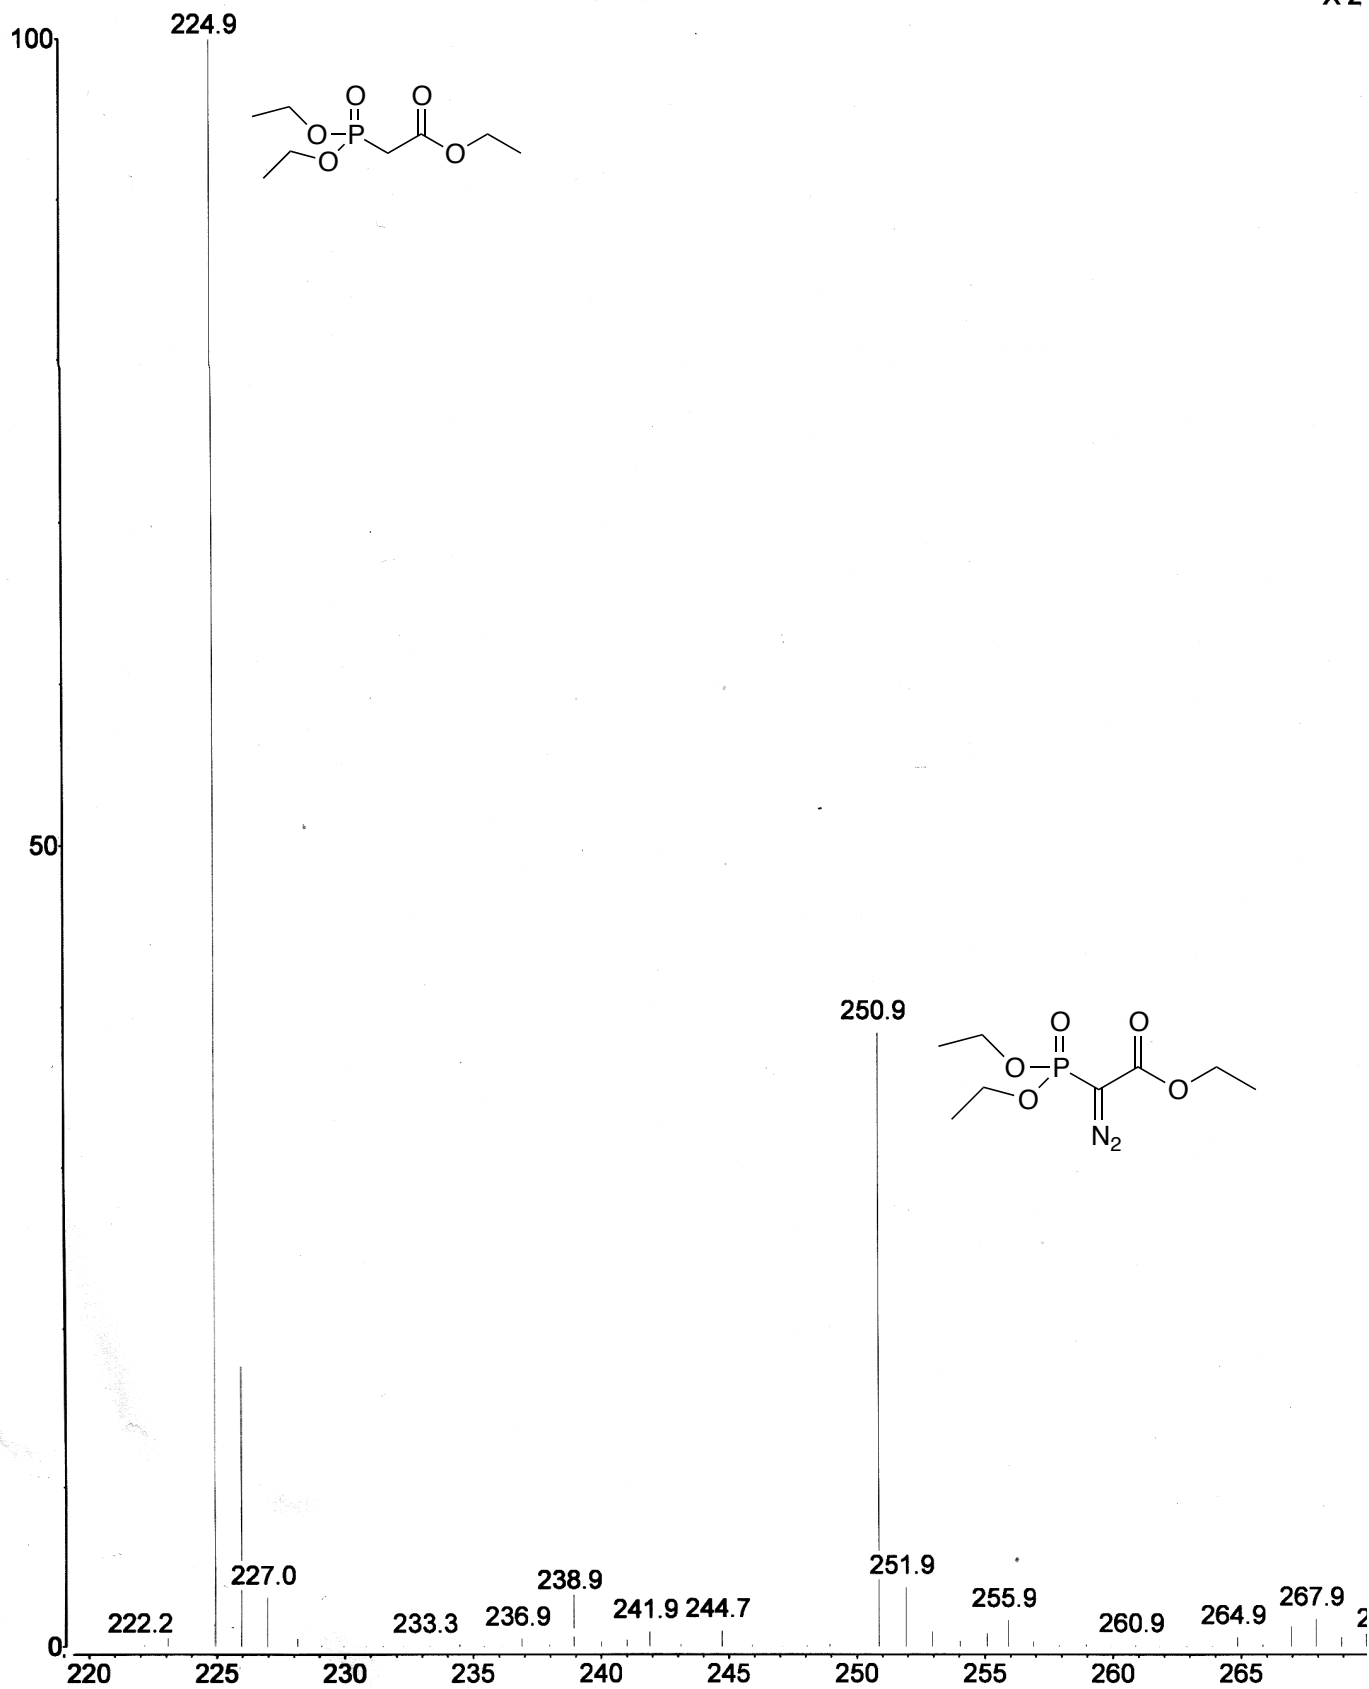

Figure S48. MS/MS spectrum of m/z 251.

LCQ Instrument Control 23 Mar 2011 03:28 PM

S#: 759 IT: 1.55 ST: 0.35 #A: 10

NL: 4.62e+007

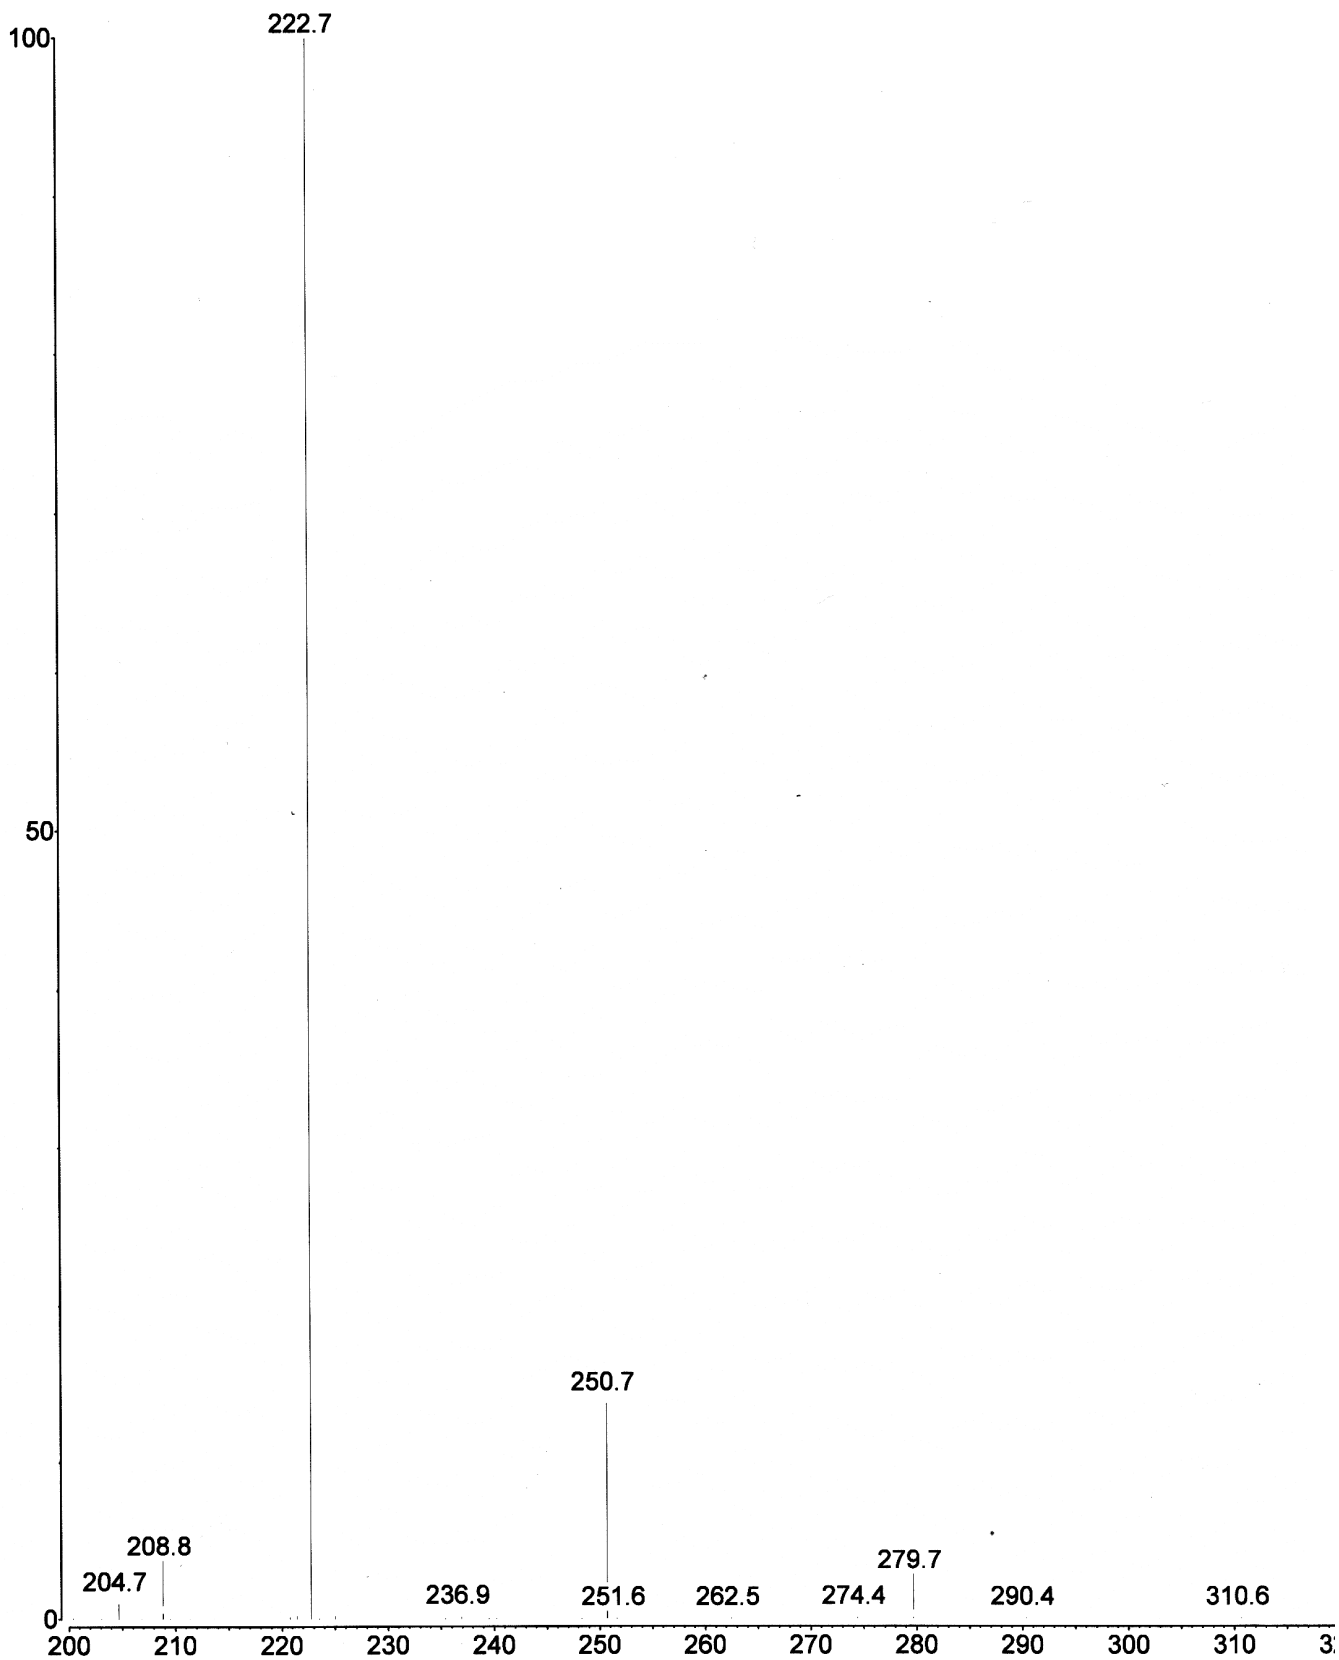

## References

1. Mintz, M.J., Walding, C.; *Org. Synth.*, **1969**, 49, 9.
2. Dawson, R.M.C.; *Data for Biochemical Research*, 3rd ed. Oxford University Press, **1986**.
3. Sun, D., et al.; *Phosphorus Sulfur Silicon., Relat. Elem.*, **2005**, 180, 2155-2161.
4. Chen, Y., Zhao, Y.-F., Yin, Y.-W., Yang, X.-Q.; *Phosphorus Sulfur Silicon., Relat. Elem.*, **1991**, 61, 31-39.
5. Hakimelahi, G. H.; Just, G. *Synth. Commun.* **1980**, 10, 429.
